# Supplementary material for: Single-Cell RNA-seq Identification of the Cellular Molecular Characteristics of Sporadic Bilateral Clear Cell Renal Cell Carcinoma
Source: Front Oncol. 2021 Jun 8;11:659251. doi: 10.3389/fonc.2021.659251 (PMC8217644; doi:10.3389/fonc.2021.659251)
Supplement: Supplementary file 2 [file DataSheet_2.xlsx]

## Sheet: Table S2
Table S2 The DEGs of each cell type in ccRCC2
p_val	avg_logFC	pct.1	pct.2	p_val_adj	cluster	gene
1.6578e-274	1.67977	0.823	0.207	3.01936e-270	CD4+ T cells	IL7R
8.76645e-226	1.54433	0.824	0.272	1.59663e-221	CD4+ T cells	LTB
1.20842e-128	0.85283	0.776	0.298	2.2009e-124	CD4+ T cells	TRAC
1.39576e-118	0.877827	0.618	0.199	2.54209e-114	CD4+ T cells	GPR183
4.59335e-115	0.657332	0.382	0.064	8.36587e-111	CD4+ T cells	TNFRSF25
2.18322e-106	0.56215	0.98	0.976	3.97631e-102	CD4+ T cells	RPS12
5.53636e-106	0.537043	0.97	0.979	1.00834e-101	CD4+ T cells	RPS18
9.81985e-105	0.780243	0.828	0.427	1.78849e-100	CD4+ T cells	CD52
6.36588e-103	0.624993	0.251	0.024	1.15942e-98	CD4+ T cells	CCR6
2.34205e-101	0.622581	0.352	0.063	4.26558e-97	CD4+ T cells	AQP3
5.25546e-100	0.609182	0.386	0.078	9.57177e-96	CD4+ T cells	RCAN3
3.33264e-98	0.514287	0.951	0.96	6.06973e-94	CD4+ T cells	RPL32
1.06413e-96	0.470912	0.276	0.035	1.93811e-92	CD4+ T cells	FLT3LG
3.08454e-96	0.486792	0.965	0.962	5.61788e-92	CD4+ T cells	RPL30
1.60604e-92	0.451787	0.953	0.964	2.92508e-88	CD4+ T cells	RPL11
5.17025e-92	0.505047	0.967	0.959	9.41657e-88	CD4+ T cells	RPS27
8.92145e-90	0.575397	0.908	0.842	1.62486e-85	CD4+ T cells	RPSA
3.11545e-89	0.724531	0.733	0.384	5.67417e-85	CD4+ T cells	FXYD5
3.4953e-88	0.642036	0.322	0.061	6.36599e-84	CD4+ T cells	CCR7
1.30076e-86	0.497284	0.945	0.949	2.36907e-82	CD4+ T cells	RPS3
2.95319e-86	0.47879	0.927	0.927	5.37864e-82	CD4+ T cells	RPL39
2.44276e-85	0.845018	0.87	0.649	4.449e-81	CD4+ T cells	ZFP36L2
2.91167e-85	0.395924	0.987	0.995	5.30302e-81	CD4+ T cells	RPL13
6.98842e-85	0.443009	0.956	0.955	1.2728e-80	CD4+ T cells	RPL34
1.2495e-82	0.469555	0.953	0.958	2.27571e-78	CD4+ T cells	RPS3A
2.63472e-81	0.576865	0.641	0.258	4.79862e-77	CD4+ T cells	SPOCK2
2.41004e-80	0.419546	0.967	0.967	4.3894e-76	CD4+ T cells	RPS2
2.0825e-79	0.666911	0.871	0.607	3.79286e-75	CD4+ T cells	S100A4
4.38948e-79	0.502663	0.901	0.872	7.99456e-75	CD4+ T cells	RPL10A
1.57998e-77	0.426664	0.932	0.942	2.87762e-73	CD4+ T cells	RPS4X
1.64971e-77	0.410618	0.98	0.986	3.00461e-73	CD4+ T cells	RPL10
5.53854e-77	0.610352	0.732	0.333	1.00873e-72	CD4+ T cells	CD2
8.67806e-77	0.414171	0.97	0.967	1.58054e-72	CD4+ T cells	RPS14
3.02328e-76	0.503147	0.265	0.045	5.5063e-72	CD4+ T cells	LINC02273
1.65182e-75	0.652335	0.687	0.31	3.00846e-71	CD4+ T cells	ACAP1
2.38648e-75	0.416075	0.948	0.938	4.34649e-71	CD4+ T cells	RPL18A
1.7681e-72	0.514753	0.724	0.317	3.22025e-68	CD4+ T cells	CD3E
2.63831e-72	0.41018	0.935	0.921	4.80516e-68	CD4+ T cells	RPLP2
8.41612e-72	0.405594	0.925	0.929	1.53283e-67	CD4+ T cells	RPS15A
2.86004e-71	0.418835	0.914	0.909	5.20898e-67	CD4+ T cells	RPL14
2.95758e-71	0.380125	0.977	0.975	5.38665e-67	CD4+ T cells	RPS27A
2.00164e-70	0.653825	0.616	0.269	3.64558e-66	CD4+ T cells	IKZF1
1.8838e-69	0.375294	0.965	0.969	3.43097e-65	CD4+ T cells	RPL28
2.71419e-69	0.402494	0.944	0.927	4.94335e-65	CD4+ T cells	RPS29
3.7516e-68	0.447947	0.918	0.928	6.83279e-64	CD4+ T cells	RPS8
4.2908e-68	0.561975	0.541	0.216	7.81484e-64	CD4+ T cells	PLP2
4.35549e-67	0.391137	0.98	0.989	7.93266e-63	CD4+ T cells	RPLP1
6.1771e-67	0.58192	0.693	0.334	1.12503e-62	CD4+ T cells	TRBC2
1.83013e-66	0.34636	0.97	0.977	3.33321e-62	CD4+ T cells	RPL41
5.2508e-66	0.528499	0.443	0.15	9.56329e-62	CD4+ T cells	PTGER4
4.9735e-65	0.39414	0.908	0.915	9.05824e-61	CD4+ T cells	RPL6
8.77818e-64	0.526522	0.941	0.81	1.59877e-59	CD4+ T cells	BTG1
5.04559e-63	0.37852	0.918	0.905	9.18954e-59	CD4+ T cells	RPS25
5.43205e-63	0.367157	0.936	0.943	9.89339e-59	CD4+ T cells	RPL18
8.7779e-63	0.371206	0.941	0.949	1.59872e-58	CD4+ T cells	RPL9
5.09826e-62	0.342598	0.947	0.969	9.28546e-58	CD4+ T cells	RPL19
5.17648e-62	0.552415	0.277	0.066	9.42792e-58	CD4+ T cells	SELL
6.15294e-62	0.609586	0.453	0.169	1.12064e-57	CD4+ T cells	SOCS1
7.73645e-61	0.368786	0.923	0.922	1.40904e-56	CD4+ T cells	RPS16
1.40237e-60	0.382075	0.964	0.97	2.55414e-56	CD4+ T cells	RPS19
2.22254e-60	0.53495	0.454	0.168	4.04791e-56	CD4+ T cells	PBXIP1
2.87761e-60	0.411855	0.905	0.901	5.24098e-56	CD4+ T cells	RPL5
5.80073e-60	0.406189	0.672	0.292	1.05649e-55	CD4+ T cells	CD3G
1.39485e-59	0.381469	0.914	0.907	2.54044e-55	CD4+ T cells	RPL35A
6.43114e-59	0.436506	0.329	0.092	1.1713e-54	CD4+ T cells	TCF7
1.19655e-58	0.517159	0.837	0.629	2.17928e-54	CD4+ T cells	SARAF
4.36486e-58	0.506294	0.749	0.437	7.94971e-54	CD4+ T cells	CD48
6.4204e-58	0.390997	0.918	0.906	1.16935e-53	CD4+ T cells	RPS13
9.17791e-58	0.388071	0.904	0.826	1.67157e-53	CD4+ T cells	RPS21
2.88911e-57	0.590546	0.762	0.466	5.26194e-53	CD4+ T cells	SF1
3.29098e-57	0.572993	0.581	0.266	5.99386e-53	CD4+ T cells	RORA
1.54416e-56	0.32685	0.979	0.956	2.81237e-52	CD4+ T cells	RPL13A
8.13199e-56	0.475862	0.678	0.334	1.48108e-51	CD4+ T cells	FYB1
9.01302e-56	0.360538	0.736	0.338	1.64154e-51	CD4+ T cells	CD3D
9.69162e-56	0.436359	0.254	0.06	1.76513e-51	CD4+ T cells	THEM4
1.6644e-55	0.524377	0.469	0.187	3.03138e-51	CD4+ T cells	PIK3IP1
1.49206e-54	0.549765	0.306	0.09	2.71748e-50	CD4+ T cells	AP3M2
2.49254e-53	0.502779	0.75	0.46	4.53966e-49	CD4+ T cells	ANKRD12
3.46169e-53	0.333216	0.921	0.913	6.30477e-49	CD4+ T cells	RPL36
1.03366e-52	0.484881	0.644	0.346	1.8826e-48	CD4+ T cells	LEPROTL1
1.17536e-52	0.475963	0.775	0.448	2.14068e-48	CD4+ T cells	STK4
1.34962e-51	0.538611	0.342	0.114	2.45806e-47	CD4+ T cells	PRMT9
3.4253e-51	0.47405	0.277	0.077	6.2385e-47	CD4+ T cells	GATA3
1.12491e-50	0.338271	0.925	0.891	2.0488e-46	CD4+ T cells	RPL27A
2.65648e-50	0.415395	0.319	0.099	4.83825e-46	CD4+ T cells	OXNAD1
3.08033e-50	0.443842	0.42	0.161	5.6102e-46	CD4+ T cells	ARHGAP15
8.84523e-50	0.438373	0.267	0.072	1.61098e-45	CD4+ T cells	ICOS
1.11309e-49	0.290468	0.961	0.969	2.02728e-45	CD4+ T cells	RPS23
1.36289e-49	0.324359	0.961	0.96	2.48223e-45	CD4+ T cells	RPL21
6.72327e-49	0.375499	0.876	0.509	1.22451e-44	CD4+ T cells	PTPRC
9.874e-49	0.45278	0.528	0.235	1.79835e-44	CD4+ T cells	TRAF3IP3
1.0845e-48	0.384532	0.291	0.085	1.97519e-44	CD4+ T cells	P2RY10
1.2627e-48	0.45192	0.844	0.64	2.29975e-44	CD4+ T cells	PABPC1
1.37918e-48	0.314608	0.923	0.934	2.5119e-44	CD4+ T cells	RPL29
5.35396e-48	0.41395	0.775	0.436	9.75117e-44	CD4+ T cells	ARL4C
5.55557e-48	0.4641	0.581	0.278	1.01184e-43	CD4+ T cells	CLEC2D
9.07007e-47	0.426802	0.286	0.086	1.65193e-42	CD4+ T cells	AC008105.3
2.16701e-46	0.346358	0.644	0.338	3.94678e-42	CD4+ T cells	BIRC3
6.22765e-46	0.429798	0.693	0.378	1.13424e-41	CD4+ T cells	EVL
3.70912e-45	0.377968	0.324	0.108	6.75543e-41	CD4+ T cells	TTC39C
1.45154e-44	0.33265	0.889	0.866	2.64369e-40	CD4+ T cells	RPS5
2.14168e-44	0.496283	1	0.993	3.90065e-40	CD4+ T cells	MALAT1
5.97118e-44	0.594824	0.359	0.136	1.08753e-39	CD4+ T cells	AC058791.1
1.07348e-43	0.45881	0.856	0.589	1.95512e-39	CD4+ T cells	SRSF7
1.09765e-43	0.510244	0.646	0.361	1.99914e-39	CD4+ T cells	YPEL5
2.33746e-43	0.406152	0.324	0.112	4.25721e-39	CD4+ T cells	BCL11B
2.47809e-43	0.273913	0.939	0.939	4.51335e-39	CD4+ T cells	RPS9
7.31675e-43	0.280988	0.943	0.94	1.3326e-38	CD4+ T cells	RPL37
1.6068e-42	0.2711	0.936	0.939	2.92646e-38	CD4+ T cells	RPL8
4.42833e-42	0.449484	0.492	0.231	8.06532e-38	CD4+ T cells	CYLD
7.2172e-41	0.528537	0.723	0.462	1.31447e-36	CD4+ T cells	TNFAIP3
1.3161e-40	0.422783	0.698	0.398	2.39701e-36	CD4+ T cells	CD44
1.6738e-40	0.317773	0.293	0.097	3.0485e-36	CD4+ T cells	MCUB
2.65361e-40	0.41611	0.272	0.087	4.83301e-36	CD4+ T cells	SC5D
3.87045e-40	0.259869	0.943	0.933	7.04925e-36	CD4+ T cells	RPS7
7.16486e-40	0.396548	0.651	0.359	1.30494e-35	CD4+ T cells	LIMD2
1.05766e-39	0.392622	0.711	0.493	1.92632e-35	CD4+ T cells	LDHB
1.24619e-39	0.275532	0.965	0.964	2.26968e-35	CD4+ T cells	RPS6
2.34592e-39	0.261465	0.936	0.95	4.27263e-35	CD4+ T cells	RPS15
2.36919e-39	0.386742	0.321	0.117	4.31501e-35	CD4+ T cells	TC2N
2.84056e-39	0.27644	0.927	0.928	5.17351e-35	CD4+ T cells	RPL23A
3.6547e-39	0.336707	0.879	0.862	6.6563e-35	CD4+ T cells	RPL22
3.80193e-39	0.375853	0.614	0.334	6.92446e-35	CD4+ T cells	GPSM3
4.00092e-39	0.417976	0.575	0.303	7.28687e-35	CD4+ T cells	CYTIP
4.31492e-39	0.395976	0.841	0.573	7.85877e-35	CD4+ T cells	CXCR4
6.71065e-39	0.320966	0.772	0.447	1.22221e-34	CD4+ T cells	CORO1A
1.07399e-38	0.421532	0.434	0.194	1.95605e-34	CD4+ T cells	EMB
1.09246e-38	0.48798	0.309	0.115	1.9897e-34	CD4+ T cells	AC016831.5
1.205e-38	0.499969	0.718	0.477	2.19466e-34	CD4+ T cells	TSC22D3
6.20501e-38	0.412342	0.61	0.326	1.13012e-33	CD4+ T cells	STK17B
1.22473e-37	0.290938	0.278	0.092	2.23061e-33	CD4+ T cells	INPP4B
3.90246e-37	0.481225	0.871	0.804	7.10755e-33	CD4+ T cells	JUNB
4.7192e-37	0.252372	0.918	0.906	8.59507e-33	CD4+ T cells	FAU
5.37616e-37	0.479534	0.689	0.434	9.79161e-33	CD4+ T cells	SLC2A3
7.81515e-37	0.478239	0.506	0.261	1.42337e-32	CD4+ T cells	EML4
1.14905e-36	0.366659	0.51	0.253	2.09276e-32	CD4+ T cells	TNFAIP8
6.353e-36	0.38696	0.281	0.101	1.15707e-31	CD4+ T cells	CDC14A
6.44148e-36	0.356444	0.328	0.128	1.17319e-31	CD4+ T cells	PAG1
1.10025e-35	0.290062	0.296	0.106	2.00389e-31	CD4+ T cells	TRAT1
1.71259e-35	0.371051	0.791	0.643	3.11915e-31	CD4+ T cells	RPS10
3.181e-35	0.280248	0.891	0.855	5.79355e-31	CD4+ T cells	RPL38
8.69451e-35	0.361675	0.563	0.308	1.58353e-30	CD4+ T cells	ICAM3
1.93837e-34	0.251605	0.918	0.916	3.53036e-30	CD4+ T cells	RPL26
5.05434e-34	0.401843	0.468	0.239	9.20548e-30	CD4+ T cells	CDKN1B
5.29212e-34	0.401582	0.767	0.505	9.63853e-30	CD4+ T cells	RSRP1
1.68608e-33	0.265388	0.912	0.872	3.07086e-29	CD4+ T cells	RPL7
8.01103e-33	0.395259	0.397	0.187	1.45905e-28	CD4+ T cells	CD55
2.56247e-32	0.273067	0.884	0.859	4.66703e-28	CD4+ T cells	RPL27
3.59465e-32	0.266392	0.886	0.86	6.54694e-28	CD4+ T cells	RPS26
6.95312e-32	0.386102	0.739	0.486	1.26637e-27	CD4+ T cells	PNISR
1.42113e-31	0.357292	0.544	0.29	2.58831e-27	CD4+ T cells	IL2RG
1.94215e-31	0.499953	0.73	0.551	3.53724e-27	CD4+ T cells	KLF2
1.2226e-30	0.277637	0.897	0.85	2.22673e-26	CD4+ T cells	RPLP0
4.85118e-30	0.372582	0.434	0.224	8.83545e-26	CD4+ T cells	RIPOR2
4.8766e-30	0.329734	0.395	0.181	8.88176e-26	CD4+ T cells	RHOH
5.80568e-30	0.303028	0.537	0.278	1.05739e-25	CD4+ T cells	LCK
2.17702e-29	0.274891	0.831	0.668	3.965e-25	CD4+ T cells	NOP53
2.29143e-29	0.499543	0.46	0.249	4.17339e-25	CD4+ T cells	TRBC1
3.20548e-29	0.35553	0.538	0.305	5.83815e-25	CD4+ T cells	NSD3
3.26379e-29	0.351602	0.463	0.24	5.94434e-25	CD4+ T cells	2021-09-06
6.00193e-29	0.327076	0.289	0.118	1.09313e-24	CD4+ T cells	USP36
6.08404e-29	0.344943	0.394	0.194	1.10809e-24	CD4+ T cells	ARL4A
1.12641e-28	0.336245	0.642	0.414	2.05153e-24	CD4+ T cells	GSTK1
1.61256e-28	0.381802	0.505	0.276	2.93695e-24	CD4+ T cells	AAK1
2.35726e-28	0.369461	0.586	0.356	4.29328e-24	CD4+ T cells	STAT3
6.11147e-28	0.323588	0.514	0.277	1.11308e-23	CD4+ T cells	STK17A
6.11757e-28	0.275298	0.281	0.114	1.11419e-23	CD4+ T cells	DEF6
6.31927e-28	0.323942	0.771	0.582	1.15093e-23	CD4+ T cells	ANXA1
1.86902e-27	0.355615	0.836	0.629	3.40405e-23	CD4+ T cells	IL32
4.41509e-27	0.283523	0.841	0.75	8.0412e-23	CD4+ T cells	RPL4
5.19393e-27	0.358589	0.493	0.274	9.4597e-23	CD4+ T cells	SAMSN1
7.6258e-27	0.26977	0.398	0.192	1.38889e-22	CD4+ T cells	LAT
9.22183e-27	0.370092	0.437	0.226	1.67957e-22	CD4+ T cells	TENT5C
1.28271e-26	0.317347	0.57	0.336	2.3362e-22	CD4+ T cells	PDCD4
1.86017e-26	0.262205	0.874	0.811	3.38793e-22	CD4+ T cells	EEF1D
4.62261e-26	0.424022	0.368	0.192	8.41915e-22	CD4+ T cells	NOSIP
1.55104e-25	0.347701	0.423	0.221	2.82491e-21	CD4+ T cells	FOXP1
6.78923e-25	0.335811	0.393	0.203	1.23652e-20	CD4+ T cells	CCND2
1.23883e-24	0.318235	0.743	0.524	2.25627e-20	CD4+ T cells	BTG2
1.2742e-24	0.375157	0.752	0.524	2.32071e-20	CD4+ T cells	N4BP2L2
1.36859e-24	0.303432	0.33	0.154	2.49261e-20	CD4+ T cells	EPB41
1.98551e-24	0.279607	0.378	0.187	3.6162e-20	CD4+ T cells	UBALD2
4.89718e-24	0.307693	0.466	0.261	8.91923e-20	CD4+ T cells	PSIP1
8.40444e-24	0.281969	0.294	0.134	1.5307e-19	CD4+ T cells	MDFIC
1.76798e-23	0.293789	0.397	0.206	3.22003e-19	CD4+ T cells	IL10RA
1.8416e-23	0.299122	0.337	0.165	3.35411e-19	CD4+ T cells	PLK3
2.49335e-23	0.412067	0.41	0.223	4.54114e-19	CD4+ T cells	KLRB1
2.76834e-23	0.285109	0.469	0.262	5.04198e-19	CD4+ T cells	MBP
4.41031e-23	0.317224	0.481	0.282	8.03251e-19	CD4+ T cells	G3BP2
5.56998e-23	0.285754	0.33	0.16	1.01446e-18	CD4+ T cells	S1PR4
6.32008e-23	0.302338	0.52	0.313	1.15108e-18	CD4+ T cells	FAM107B
1.51766e-22	0.332566	0.293	0.137	2.76411e-18	CD4+ T cells	NABP1
2.73039e-22	0.313813	0.261	0.115	4.97286e-18	CD4+ T cells	TMC8
5.65408e-22	0.316283	0.546	0.335	1.02978e-17	CD4+ T cells	CCNL1
1.52692e-21	0.302067	0.255	0.114	2.78098e-17	CD4+ T cells	BCL2
1.84289e-21	0.252048	0.268	0.12	3.35646e-17	CD4+ T cells	EVI2A
3.98021e-21	0.305949	0.289	0.136	7.24916e-17	CD4+ T cells	RASGRP1
9.99311e-21	0.341096	0.364	0.196	1.82005e-16	CD4+ T cells	TRABD
1.03225e-20	0.318122	0.514	0.313	1.88003e-16	CD4+ T cells	FAM118A
2.04885e-20	0.326378	0.463	0.279	3.73157e-16	CD4+ T cells	SMCHD1
1.34928e-19	0.310914	0.442	0.262	2.45744e-15	CD4+ T cells	POLR2J3.1
1.45819e-19	0.311274	0.485	0.292	2.6558e-15	CD4+ T cells	FMNL1
2.22191e-19	0.251463	0.332	0.171	4.04677e-15	CD4+ T cells	EVI2B
3.53843e-19	0.273703	0.302	0.153	6.44453e-15	CD4+ T cells	NCK2
6.14312e-19	0.257194	0.835	0.71	1.11885e-14	CD4+ T cells	SH3BGRL3
8.08205e-19	0.302779	0.313	0.164	1.47198e-14	CD4+ T cells	MTERF4
1.62991e-18	0.360179	0.273	0.137	2.96856e-14	CD4+ T cells	SORL1
3.35885e-18	0.318082	0.506	0.318	6.11747e-14	CD4+ T cells	NKTR
3.54697e-18	0.374833	0.531	0.351	6.4601e-14	CD4+ T cells	IDS
4.70888e-18	0.278014	0.307	0.157	8.57628e-14	CD4+ T cells	RNF125
4.75561e-18	0.255437	0.545	0.345	8.66139e-14	CD4+ T cells	CDC42SE2
1.18685e-17	0.317617	0.352	0.2	2.16162e-13	CD4+ T cells	ODF2L
1.94292e-17	0.294164	0.303	0.16	3.53864e-13	CD4+ T cells	CYTH1
2.83372e-17	0.251269	0.495	0.311	5.16106e-13	CD4+ T cells	KIAA1551
2.87745e-17	0.274115	0.492	0.306	5.2407e-13	CD4+ T cells	PIK3R1
8.55008e-17	0.258674	0.342	0.191	1.55723e-12	CD4+ T cells	ANKRD13D
8.88437e-17	0.256047	0.375	0.215	1.61811e-12	CD4+ T cells	CHD2
8.88565e-17	0.250777	0.464	0.297	1.61834e-12	CD4+ T cells	RPL17
2.77324e-15	0.260937	0.532	0.358	5.05089e-11	CD4+ T cells	RBM25
3.37632e-15	0.258095	0.724	0.546	6.14929e-11	CD4+ T cells	FUS
2.57913e-14	0.250037	0.337	0.194	4.69736e-10	CD4+ T cells	ZC3HAV1
2.68198e-14	0.299112	0.419	0.261	4.88469e-10	CD4+ T cells	ATM
4.77267e-14	0.252492	0.441	0.283	8.69246e-10	CD4+ T cells	TNRC6B
1.35613e-13	0.27595	0.505	0.341	2.46991e-09	CD4+ T cells	GPBP1
9.63927e-12	0.255736	0.337	0.215	1.7556e-07	CD4+ T cells	ITGA4
1.51377e-11	0.269765	0.566	0.414	2.75703e-07	CD4+ T cells	MPHOSPH8
3.85555e-10	0.272998	0.414	0.288	7.02212e-06	CD4+ T cells	GOLGB1
1.43539e-08	0.250043	0.303	0.202	0.000261428	CD4+ T cells	TUT4
0.00131715	0.26567	0.462	0.382	1	CD4+ T cells	AC020916.1
0	2.50504	0.91	0.11	0	CD8+ T cells	GZMK
7.86241e-270	1.5684	0.981	0.351	1.43198e-265	CD8+ T cells	CCL5
1.06829e-265	1.43202	0.958	0.272	1.94567e-261	CD8+ T cells	GZMA
1.43092e-245	1.42291	0.708	0.125	2.60613e-241	CD8+ T cells	CD8A
2.29521e-220	1.1663	0.926	0.279	4.18026e-216	CD8+ T cells	CST7
3.91871e-198	1.13493	0.901	0.318	7.13714e-194	CD8+ T cells	CD3D
9.46273e-169	1.07113	0.53	0.095	1.72345e-164	CD8+ T cells	CD27
1.7455e-160	1.11438	0.739	0.249	3.17909e-156	CD8+ T cells	APOBEC3G
2.45264e-160	0.966842	0.974	0.503	4.46699e-156	CD8+ T cells	PTPRC
1.12341e-157	0.565517	0.896	0.277	2.04607e-153	CD8+ T cells	NKG7
4.34684e-156	0.982525	0.853	0.301	7.91689e-152	CD8+ T cells	TRAC
7.73806e-156	1.18397	0.89	0.438	1.40933e-151	CD8+ T cells	DUSP2
6.50021e-154	0.951864	0.858	0.322	1.18388e-149	CD8+ T cells	CD2
2.72451e-152	1.0573	0.491	0.083	4.96215e-148	CD8+ T cells	CD8B
9.01092e-152	0.921004	0.808	0.278	1.64116e-147	CD8+ T cells	CD3G
1.25343e-151	0.926032	0.909	0.397	2.28287e-147	CD8+ T cells	HCST
1.47516e-150	0.931235	0.839	0.309	2.68672e-146	CD8+ T cells	CD3E
3.19959e-141	1.03684	0.813	0.323	5.82742e-137	CD8+ T cells	TRBC2
1.21068e-140	1.05799	0.924	0.566	2.20501e-136	CD8+ T cells	CXCR4
4.69517e-120	0.58418	0.998	0.84	8.55132e-116	CD8+ T cells	HLA-C
3.10078e-119	0.818024	0.895	0.433	5.64746e-115	CD8+ T cells	CORO1A
3.73631e-117	0.846654	0.72	0.273	6.80494e-113	CD8+ T cells	GZMM
1.80196e-115	0.551525	0.997	0.876	3.28191e-111	CD8+ T cells	HLA-A
6.80003e-114	1.27132	0.849	0.412	1.23849e-109	CD8+ T cells	CCL4
2.97053e-105	0.798809	0.342	0.054	5.41022e-101	CD8+ T cells	TNFSF9
6.81178e-101	0.46593	0.995	0.962	1.24063e-96	CD8+ T cells	RPL28
1.07059e-100	0.70362	0.947	0.613	1.94986e-96	CD8+ T cells	IL32
2.0588e-100	0.82119	0.512	0.147	3.7497e-96	CD8+ T cells	KLRG1
3.74324e-100	0.706015	0.742	0.314	6.81756e-96	CD8+ T cells	ACAP1
4.97475e-99	0.71888	0.402	0.088	9.06051e-95	CD8+ T cells	SH2D1A
7.80026e-98	0.822594	0.689	0.297	1.42066e-93	CD8+ T cells	ITM2A
2.4908e-97	0.689704	0.66	0.261	4.53649e-93	CD8+ T cells	LCK
2.99319e-96	0.9121	0.374	0.077	5.4515e-92	CD8+ T cells	DUSP4
1.60957e-95	0.727766	0.779	0.391	2.93151e-91	CD8+ T cells	RARRES3
5.07452e-87	0.842761	0.456	0.131	9.24222e-83	CD8+ T cells	ITM2C
1.17724e-86	0.477358	0.994	0.954	2.14412e-82	CD8+ T cells	RPS27
3.84623e-86	0.775573	0.377	0.086	7.00514e-82	CD8+ T cells	TRGC2
1.48357e-84	0.617731	0.985	0.806	2.70203e-80	CD8+ T cells	BTG1
1.4491e-82	0.667233	0.824	0.451	2.63925e-78	CD8+ T cells	STK4
5.60065e-82	0.382383	1	0.988	1.02005e-77	CD8+ T cells	B2M
4.75456e-78	0.603382	0.777	0.37	8.65947e-74	CD8+ T cells	ITGB2
1.87521e-77	0.664202	0.359	0.089	3.41532e-73	CD8+ T cells	BICDL1
4.11714e-77	0.636417	0.708	0.341	7.49854e-73	CD8+ T cells	FYB1
2.8585e-76	0.596919	0.853	0.508	5.20619e-72	CD8+ T cells	HLA-F
4.09517e-75	0.429853	0.985	0.916	7.45853e-71	CD8+ T cells	RPS15A
1.68354e-73	0.74856	0.515	0.193	3.06623e-69	CD8+ T cells	SLA
8.0285e-73	0.594464	0.892	0.592	1.46223e-68	CD8+ T cells	SRSF7
8.24375e-73	0.910555	0.6	0.264	1.50143e-68	CD8+ T cells	RGS1
3.37923e-71	0.55013	0.76	0.397	6.15459e-67	CD8+ T cells	CD44
5.28175e-71	0.655033	0.342	0.085	9.61966e-67	CD8+ T cells	TIGIT
2.28038e-70	0.609108	0.363	0.099	4.15326e-66	CD8+ T cells	TRAT1
6.24759e-69	0.529175	0.949	0.69	1.13787e-64	CD8+ T cells	SH3BGRL3
3.40943e-68	0.863238	0.495	0.199	6.20959e-64	CD8+ T cells	CMC1
3.91611e-68	0.565962	0.747	0.392	7.13241e-64	CD8+ T cells	PPP2R5C
1.00242e-67	0.615734	0.535	0.21	1.82571e-63	CD8+ T cells	PTPN7
5.3301e-67	0.583878	0.856	0.438	9.70772e-63	CD8+ T cells	CD52
2.91845e-66	0.657712	0.793	0.475	5.31537e-62	CD8+ T cells	IRF1
9.29826e-66	0.395716	0.995	0.874	1.69349e-61	CD8+ T cells	HLA-B
2.47112e-65	0.633525	0.694	0.361	4.50066e-61	CD8+ T cells	LIMD2
2.58073e-65	0.564967	0.683	0.345	4.70029e-61	CD8+ T cells	CLEC2B
3.92378e-65	0.588988	0.654	0.328	7.14639e-61	CD8+ T cells	STK17B
4.73302e-65	0.333526	1	0.982	8.62026e-61	CD8+ T cells	TMSB4X
6.93887e-65	0.597848	0.428	0.146	1.26378e-60	CD8+ T cells	CD96
5.0276e-64	0.596423	0.663	0.338	9.15676e-60	CD8+ T cells	CYTOR
6.50835e-63	0.595983	0.481	0.186	1.18537e-58	CD8+ T cells	LYAR
8.80872e-63	0.654564	0.527	0.233	1.60433e-58	CD8+ T cells	RNF19A
1.94445e-61	0.803648	0.607	0.316	3.54143e-57	CD8+ T cells	TUBA4A
1.24425e-60	0.540047	0.713	0.387	2.26615e-56	CD8+ T cells	EVL
4.68688e-60	0.570605	0.371	0.118	8.53621e-56	CD8+ T cells	SAMD3
5.21395e-60	0.596055	0.774	0.414	9.49617e-56	CD8+ T cells	CD69
2.11473e-58	0.530236	0.75	0.454	3.85155e-54	CD8+ T cells	PSMB9
9.00164e-58	0.540507	0.713	0.387	1.63947e-53	CD8+ T cells	LCP1
9.40354e-58	0.522746	0.798	0.439	1.71267e-53	CD8+ T cells	CD48
3.10587e-57	0.513605	0.713	0.388	5.65673e-53	CD8+ T cells	RAC2
3.06257e-56	0.350184	1	0.993	5.57785e-52	CD8+ T cells	MALAT1
4.48155e-56	0.547342	0.668	0.368	8.16224e-52	CD8+ T cells	YPEL5
5.72957e-56	0.312514	0.955	0.653	1.04353e-51	CD8+ T cells	SRGN
9.20117e-56	0.566581	0.41	0.145	1.67581e-51	CD8+ T cells	PYHIN1
1.16743e-55	0.583386	0.589	0.289	2.12624e-51	CD8+ T cells	CLEC2D
1.58847e-55	0.534043	0.363	0.119	2.89308e-51	CD8+ T cells	ARAP2
6.29957e-55	0.515639	0.346	0.112	1.14734e-50	CD8+ T cells	PSTPIP1
7.93317e-55	0.549947	0.564	0.276	1.44487e-50	CD8+ T cells	STK17A
8.53165e-55	0.495353	0.465	0.162	1.55387e-50	CD8+ T cells	GZMH
2.24967e-54	0.353644	0.985	0.94	4.09733e-50	CD8+ T cells	RPS3
7.29172e-52	0.577183	0.348	0.117	1.32804e-47	CD8+ T cells	LYST
4.80061e-51	0.518233	0.459	0.198	8.74336e-47	CD8+ T cells	2021-09-01
9.34008e-51	0.408523	0.937	0.743	1.70111e-46	CD8+ T cells	PFN1
1.31337e-50	0.34823	0.986	0.919	2.39204e-46	CD8+ T cells	RPS29
2.23164e-50	0.557989	0.403	0.162	4.06449e-46	CD8+ T cells	APOBEC3C
3.05498e-50	0.489741	0.584	0.292	5.56404e-46	CD8+ T cells	IL2RG
3.18816e-50	0.523535	0.504	0.234	5.80659e-46	CD8+ T cells	TBC1D10C
5.30841e-50	0.527531	0.77	0.462	9.6682e-46	CD8+ T cells	TNFAIP3
1.23675e-49	0.498726	0.688	0.407	2.25249e-45	CD8+ T cells	RNF213
1.99759e-49	0.545236	0.643	0.358	3.63822e-45	CD8+ T cells	LEPROTL1
5.25981e-49	0.596987	0.45	0.196	9.57968e-45	CD8+ T cells	CEMIP2
2.12011e-48	0.441003	0.907	0.65	3.86136e-44	CD8+ T cells	ZFP36L2
5.45864e-48	0.488151	0.376	0.138	9.94183e-44	CD8+ T cells	MATK
6.20017e-48	0.659995	0.561	0.299	1.12924e-43	CD8+ T cells	PIK3R1
7.56313e-48	0.298411	0.994	0.971	1.37747e-43	CD8+ T cells	RPL41
8.77508e-48	0.532302	0.648	0.376	1.5982e-43	CD8+ T cells	COTL1
8.32198e-47	0.939858	0.578	0.302	1.51568e-42	CD8+ T cells	CCL4L2
1.34776e-46	0.441915	0.796	0.446	2.45467e-42	CD8+ T cells	ARL4C
2.21916e-46	0.465483	0.552	0.287	4.04176e-42	CD8+ T cells	WIPF1
3.13292e-46	0.514367	0.495	0.236	5.70598e-42	CD8+ T cells	SKAP1
5.2671e-46	0.454007	0.355	0.133	9.59298e-42	CD8+ T cells	RAB27A
6.55241e-46	0.488319	0.592	0.31	1.19339e-41	CD8+ T cells	CYTIP
6.96602e-46	0.508052	0.473	0.215	1.26872e-41	CD8+ T cells	AKNA
1.12404e-45	0.458913	0.631	0.342	2.04721e-41	CD8+ T cells	GPSM3
1.20839e-45	0.474805	0.575	0.293	2.20084e-41	CD8+ T cells	IKZF1
4.19546e-45	0.505777	0.447	0.196	7.64119e-41	CD8+ T cells	ITGA4
1.20691e-44	0.329412	0.957	0.682	2.19814e-40	CD8+ T cells	CYBA
1.20776e-44	0.460098	0.425	0.185	2.1997e-40	CD8+ T cells	SLC38A1
1.86057e-44	0.510899	0.479	0.225	3.38866e-40	CD8+ T cells	TENT5C
4.23399e-44	0.48593	0.278	0.088	7.71136e-40	CD8+ T cells	SIT1
4.61907e-44	0.482921	0.272	0.083	8.4127e-40	CD8+ T cells	GPR171
3.10244e-43	0.50354	0.332	0.123	5.65047e-39	CD8+ T cells	TC2N
4.43851e-43	0.281876	0.989	0.946	8.08385e-39	CD8+ T cells	RPS24
7.06134e-43	0.49496	0.595	0.341	1.28608e-38	CD8+ T cells	PDCD4
8.52821e-43	0.651464	0.442	0.214	1.55324e-38	CD8+ T cells	CLDND1
1.16557e-42	0.431847	0.748	0.493	2.12286e-38	CD8+ T cells	CD99
4.04386e-42	0.379386	0.686	0.399	7.36509e-38	CD8+ T cells	CD37
7.73837e-42	0.299849	0.971	0.894	1.40939e-37	CD8+ T cells	RPS25
2.1015e-41	0.488366	0.457	0.214	3.82747e-37	CD8+ T cells	RUNX3
2.8474e-41	0.430445	0.57	0.303	5.18597e-37	CD8+ T cells	LSP1
1.17476e-40	0.426105	0.856	0.613	2.1396e-36	CD8+ T cells	ARHGDIB
2.13363e-40	0.295622	1	0.971	3.88599e-36	CD8+ T cells	MT-CO1
2.25958e-40	0.723424	0.499	0.249	4.11538e-36	CD8+ T cells	TRBC1
9.41183e-40	0.450859	0.337	0.13	1.71418e-35	CD8+ T cells	CD84
1.20489e-39	0.403122	0.79	0.511	2.19446e-35	CD8+ T cells	RSRP1
1.25053e-39	0.477921	0.379	0.161	2.2776e-35	CD8+ T cells	IKZF3
1.86918e-39	0.411449	0.767	0.514	3.40433e-35	CD8+ T cells	GMFG
2.02626e-39	0.443208	0.425	0.194	3.69043e-35	CD8+ T cells	LAT
4.41999e-39	0.512734	0.444	0.22	8.05012e-35	CD8+ T cells	ORAI1
1.80701e-38	0.355003	0.855	0.67	3.2911e-34	CD8+ T cells	TMA7
8.47396e-38	0.451373	0.578	0.346	1.54336e-33	CD8+ T cells	CDC42SE2
9.77791e-38	0.364789	0.862	0.633	1.78085e-33	CD8+ T cells	SARAF
1.18556e-37	0.41538	0.536	0.289	2.15927e-33	CD8+ T cells	FMNL1
1.41806e-37	0.448263	0.397	0.181	2.58272e-33	CD8+ T cells	CCSER2
3.7773e-37	0.440777	0.679	0.438	6.8796e-33	CD8+ T cells	VAMP2
4.72288e-37	0.433862	0.581	0.333	8.60179e-33	CD8+ T cells	CD53
7.75585e-37	0.430108	0.329	0.134	1.41257e-32	CD8+ T cells	RASGRP1
1.37712e-35	0.251687	0.98	0.893	2.50814e-31	CD8+ T cells	FAU
1.71086e-35	0.463142	0.261	0.091	3.116e-31	CD8+ T cells	GBP5
1.88451e-35	0.404078	0.448	0.228	3.43225e-31	CD8+ T cells	DOCK8
5.43679e-35	0.45431	0.34	0.143	9.90203e-31	CD8+ T cells	ITGAL
6.50991e-35	0.264761	0.977	0.912	1.18565e-30	CD8+ T cells	RPLP2
8.12814e-35	0.432911	0.535	0.31	1.48038e-30	CD8+ T cells	KIAA1551
1.61387e-34	0.394237	0.563	0.318	2.93935e-30	CD8+ T cells	ICAM3
2.97048e-34	0.418539	0.303	0.122	5.41014e-30	CD8+ T cells	TTC39C
1.75794e-33	0.449589	0.529	0.299	3.20174e-29	CD8+ T cells	SPOCK2
2.61853e-33	0.434631	0.457	0.247	4.76912e-29	CD8+ T cells	APBB1IP
4.37642e-33	0.347065	0.609	0.377	7.97078e-29	CD8+ T cells	GYPC
5.21956e-33	0.406799	0.465	0.249	9.50638e-29	CD8+ T cells	2021-09-06
7.11682e-33	0.394441	0.411	0.209	1.29619e-28	CD8+ T cells	EMB
1.49444e-32	0.363205	0.27	0.099	2.72183e-28	CD8+ T cells	ARHGAP9
1.58825e-32	0.336195	0.961	0.854	2.89269e-28	CD8+ T cells	JUND
1.92511e-32	0.515924	0.487	0.26	3.50621e-28	CD8+ T cells	ZNF331
4.11953e-32	0.265202	0.975	0.917	7.50289e-28	CD8+ T cells	RPL23A
5.10758e-32	0.404761	0.573	0.349	9.30244e-28	CD8+ T cells	IDS
8.66399e-32	0.43856	0.447	0.241	1.57797e-27	CD8+ T cells	HMGB2
1.39972e-31	0.293889	0.96	0.844	2.5493e-27	CD8+ T cells	RPS26
6.24138e-31	0.449369	0.318	0.139	1.13674e-26	CD8+ T cells	PTPN22
1.06047e-30	0.302782	0.606	0.366	1.93144e-26	CD8+ T cells	CTSC
2.92303e-30	0.378213	0.476	0.262	5.32371e-26	CD8+ T cells	C12orf75
2.97934e-30	0.377607	0.624	0.416	5.42628e-26	CD8+ T cells	SRSF2
4.50699e-30	0.388312	0.28	0.113	8.20859e-26	CD8+ T cells	PARP8
5.62775e-30	0.418382	0.471	0.27	1.02498e-25	CD8+ T cells	BTN3A2
6.42541e-30	0.389075	0.459	0.248	1.17026e-25	CD8+ T cells	PLP2
8.23388e-30	0.445989	0.382	0.193	1.49964e-25	CD8+ T cells	RHOH
1.17411e-29	0.387025	0.461	0.258	2.13841e-25	CD8+ T cells	UBE2S
3.8803e-29	0.294431	0.699	0.45	7.06719e-25	CD8+ T cells	LAPTM5
5.15838e-29	0.359453	0.457	0.253	9.39496e-25	CD8+ T cells	CKLF
5.76767e-29	0.450257	0.567	0.376	1.05047e-24	CD8+ T cells	TERF2IP
7.51598e-29	0.429939	0.402	0.207	1.36889e-24	CD8+ T cells	TAGAP
8.91658e-29	0.409307	0.436	0.238	1.62398e-24	CD8+ T cells	CELF2
1.14292e-28	0.393078	0.328	0.155	2.08161e-24	CD8+ T cells	GRK6
4.85284e-28	0.41699	0.431	0.24	8.83848e-24	CD8+ T cells	CNOT6L
5.71878e-28	0.339595	0.598	0.373	1.04156e-23	CD8+ T cells	REL
7.88808e-28	0.400148	0.334	0.158	1.43666e-23	CD8+ T cells	RASAL3
2.72482e-27	0.307576	0.745	0.535	4.96272e-23	CD8+ T cells	N4BP2L2
3.60531e-27	0.369169	0.563	0.352	6.56635e-23	CD8+ T cells	DNAJB1
5.54559e-27	0.390842	0.501	0.307	1.01002e-22	CD8+ T cells	PPP1R2
6.60807e-27	0.35269	0.318	0.148	1.20353e-22	CD8+ T cells	RABGAP1L
6.67031e-27	0.342851	0.586	0.384	1.21486e-22	CD8+ T cells	ELF1
1.81414e-26	0.351346	0.403	0.213	3.3041e-22	CD8+ T cells	IL10RA
2.45454e-26	0.364606	0.399	0.22	4.47045e-22	CD8+ T cells	WNK1
6.05603e-26	0.308182	0.674	0.489	1.10298e-21	CD8+ T cells	DDX24
6.74015e-26	0.417662	0.708	0.489	1.22758e-21	CD8+ T cells	TSC22D3
1.0887e-25	0.418898	0.371	0.197	1.98285e-21	CD8+ T cells	ADGRE5
1.71984e-25	0.39329	0.427	0.235	3.13235e-21	CD8+ T cells	ALOX5AP
1.77423e-25	0.313233	0.55	0.344	3.2314e-21	CD8+ T cells	FYN
2.99291e-25	0.350663	0.413	0.237	5.45099e-21	CD8+ T cells	BUB3
3.36605e-25	0.302274	0.491	0.288	6.13059e-21	CD8+ T cells	AAK1
4.28872e-25	0.290028	0.609	0.416	7.81104e-21	CD8+ T cells	DRAP1
6.45656e-25	0.34338	0.467	0.28	1.17593e-20	CD8+ T cells	EML4
2.06272e-24	0.330032	0.301	0.14	3.75682e-20	CD8+ T cells	SH2D2A
3.02078e-24	0.28981	0.719	0.519	5.50175e-20	CD8+ T cells	YWHAZ
3.25003e-24	0.351779	0.343	0.178	5.91928e-20	CD8+ T cells	ARHGAP30
4.88847e-24	0.318437	0.264	0.114	8.90337e-20	CD8+ T cells	IL2RB
5.31891e-24	0.327524	0.393	0.216	9.68733e-20	CD8+ T cells	PIK3IP1
1.29291e-23	0.336028	0.329	0.169	2.35477e-19	CD8+ T cells	CNN2
1.59938e-23	0.276022	0.617	0.424	2.91294e-19	CD8+ T cells	HNRNPH1
2.31444e-23	0.33343	0.292	0.139	4.21529e-19	CD8+ T cells	GLIPR2
2.6727e-23	0.337415	0.522	0.348	4.8678e-19	CD8+ T cells	RSRC2
3.00057e-23	0.309067	0.345	0.177	5.46493e-19	CD8+ T cells	GNG2
3.00321e-23	0.320744	0.311	0.153	5.46975e-19	CD8+ T cells	ATF7IP
3.84663e-23	0.334385	0.391	0.225	7.00588e-19	CD8+ T cells	CCDC12
3.86101e-23	0.367023	0.391	0.226	7.03206e-19	CD8+ T cells	SH3KBP1
4.64097e-23	0.344889	0.28	0.13	8.45261e-19	CD8+ T cells	BCL11B
4.934e-23	0.296356	0.464	0.281	8.9863e-19	CD8+ T cells	HCLS1
7.0261e-23	0.330895	0.45	0.264	1.27966e-18	CD8+ T cells	TRAF3IP3
1.12634e-22	0.316986	0.28	0.129	2.05141e-18	CD8+ T cells	RBM38
1.26525e-22	0.308431	0.275	0.126	2.3044e-18	CD8+ T cells	NCF1
1.32455e-22	0.317222	0.328	0.165	2.4124e-18	CD8+ T cells	APMAP
1.73666e-22	0.347326	0.306	0.152	3.16298e-18	CD8+ T cells	MYO1G
2.49559e-22	0.264584	0.716	0.537	4.54521e-18	CD8+ T cells	PSME1
7.21719e-22	0.37512	0.453	0.278	1.31447e-17	CD8+ T cells	ISG20
8.56269e-22	0.316447	0.598	0.428	1.55952e-17	CD8+ T cells	GCC2
9.91078e-22	0.2612	0.467	0.284	1.80505e-17	CD8+ T cells	DNAJC1
9.98911e-22	0.329933	0.365	0.199	1.81932e-17	CD8+ T cells	PBXIP1
1.01804e-21	0.272884	0.515	0.333	1.85416e-17	CD8+ T cells	TAPBP
1.20536e-21	0.280483	0.677	0.497	2.19532e-17	CD8+ T cells	SF1
1.28611e-21	0.354582	0.433	0.268	2.3424e-17	CD8+ T cells	ARHGEF1
2.05538e-21	0.332002	0.298	0.151	3.74347e-17	CD8+ T cells	RHOF
2.35205e-21	0.286299	0.549	0.376	4.2838e-17	CD8+ T cells	C9orf16
3.05662e-21	0.325408	0.459	0.287	5.56703e-17	CD8+ T cells	SMCHD1
5.54192e-21	0.293625	0.577	0.4	1.00935e-16	CD8+ T cells	AKAP13
6.18008e-21	0.348214	0.377	0.214	1.12558e-16	CD8+ T cells	CCND2
8.43075e-21	0.304446	0.255	0.118	1.53549e-16	CD8+ T cells	STAT4
1.21115e-20	0.300941	0.447	0.277	2.20587e-16	CD8+ T cells	TNFAIP8
1.2609e-20	0.289563	0.631	0.457	2.29647e-16	CD8+ T cells	KMT2E
2.30251e-20	0.331338	0.448	0.289	4.19355e-16	CD8+ T cells	FNBP1
2.87983e-20	0.318277	0.28	0.141	5.24503e-16	CD8+ T cells	N4BP1
3.46419e-20	0.281901	0.501	0.324	6.30932e-16	CD8+ T cells	FAM118A
4.63982e-20	0.330939	0.312	0.165	8.45051e-16	CD8+ T cells	EPB41
8.77023e-20	0.446631	0.484	0.296	1.59732e-15	CD8+ T cells	MT2A
1.103e-19	0.288331	0.427	0.254	2.00888e-15	CD8+ T cells	SYNE1
1.58903e-19	0.312533	0.379	0.219	2.8941e-15	CD8+ T cells	PDE4B
1.60903e-19	0.36039	0.342	0.198	2.93054e-15	CD8+ T cells	SYNRG
3.36502e-19	0.304942	0.372	0.221	6.12871e-15	CD8+ T cells	KANSL1
4.85571e-19	0.296559	0.27	0.136	8.8437e-15	CD8+ T cells	PDE7A
5.62409e-19	0.29738	0.499	0.334	1.02432e-14	CD8+ T cells	PAXX
5.86659e-19	0.293641	0.505	0.342	1.06848e-14	CD8+ T cells	ARID4B
5.91201e-19	0.302073	0.267	0.135	1.07675e-14	CD8+ T cells	JMJD6
8.03877e-19	0.305872	0.308	0.165	1.4641e-14	CD8+ T cells	PTPN4
8.13977e-19	0.262249	0.44	0.279	1.4825e-14	CD8+ T cells	ABRACL
8.40198e-19	0.278246	0.584	0.423	1.53025e-14	CD8+ T cells	ERP29
9.06652e-19	0.282476	0.315	0.167	1.65129e-14	CD8+ T cells	SYTL3
9.65412e-19	0.32966	0.457	0.307	1.75831e-14	CD8+ T cells	NCOR1
1.1714e-18	0.27183	0.44	0.279	2.13348e-14	CD8+ T cells	EPC1
1.91309e-18	0.348441	0.607	0.435	3.48432e-14	CD8+ T cells	CREM
3.18518e-18	0.314048	0.297	0.159	5.80117e-14	CD8+ T cells	AC058791.1
3.25138e-18	0.32672	0.354	0.209	5.92174e-14	CD8+ T cells	TAP1
5.27452e-18	0.308905	0.32	0.182	9.60649e-14	CD8+ T cells	PPP1R18
6.35844e-18	0.299298	0.334	0.194	1.15806e-13	CD8+ T cells	STK10
1.14211e-17	0.277798	0.301	0.164	2.08012e-13	CD8+ T cells	RNF125
1.44657e-17	0.272732	0.363	0.218	2.63464e-13	CD8+ T cells	AC245297.3
1.56862e-17	0.272189	0.368	0.226	2.85692e-13	CD8+ T cells	CCNDBP1
1.6338e-17	0.353548	0.345	0.204	2.97565e-13	CD8+ T cells	RBL2
1.71299e-17	0.2922	0.59	0.435	3.11987e-13	CD8+ T cells	GSTK1
1.7624e-17	0.303305	0.431	0.28	3.20986e-13	CD8+ T cells	DDX6
1.8008e-17	0.302197	0.255	0.131	3.27979e-13	CD8+ T cells	NAA50
2.01144e-17	0.325256	0.388	0.243	3.66343e-13	CD8+ T cells	TTC14
2.81767e-17	0.305321	0.261	0.135	5.13181e-13	CD8+ T cells	C16orf54
2.94629e-17	0.297759	0.312	0.181	5.36608e-13	CD8+ T cells	RAB8B
3.22501e-17	0.30422	0.32	0.184	5.87372e-13	CD8+ T cells	TMC6
3.67017e-17	0.296164	0.459	0.307	6.68449e-13	CD8+ T cells	ORMDL1
5.22875e-17	0.282875	0.413	0.266	9.52313e-13	CD8+ T cells	SUN2
9.95002e-17	0.472061	0.403	0.27	1.8122e-12	CD8+ T cells	PPP1R14B
1.16668e-16	0.26017	0.512	0.356	2.12487e-12	CD8+ T cells	DDX46
2.24349e-16	0.290336	0.369	0.232	4.08607e-12	CD8+ T cells	CASP4
3.55263e-16	0.25691	0.351	0.212	6.47041e-12	CD8+ T cells	CCNH
3.73004e-16	0.271632	0.413	0.275	6.79352e-12	CD8+ T cells	SIGIRR
3.92428e-16	0.268255	0.383	0.247	7.14729e-12	CD8+ T cells	TMEM160
4.50579e-16	0.327963	0.275	0.149	8.2064e-12	CD8+ T cells	AC004687.1
4.80544e-16	0.265452	0.26	0.139	8.75214e-12	CD8+ T cells	NELFCD
4.81437e-16	0.292487	0.467	0.321	8.76842e-12	CD8+ T cells	MYCBP2
6.56184e-16	0.280859	0.284	0.16	1.19511e-11	CD8+ T cells	TRIM22
8.94183e-16	0.252507	0.519	0.368	1.62858e-11	CD8+ T cells	RBM25
2.76106e-15	0.271258	0.314	0.188	5.02872e-11	CD8+ T cells	OFD1
2.88165e-15	0.290446	0.377	0.245	5.24835e-11	CD8+ T cells	VPS13C
3.12669e-15	0.26292	0.292	0.17	5.69464e-11	CD8+ T cells	MFSD10
3.29729e-15	0.277347	0.461	0.327	6.00535e-11	CD8+ T cells	TAF1D
4.2797e-15	0.254589	0.41	0.262	7.79463e-11	CD8+ T cells	BIN2
4.36179e-15	0.262827	0.306	0.182	7.94413e-11	CD8+ T cells	FERMT3
4.49336e-15	0.282485	0.372	0.237	8.18376e-11	CD8+ T cells	NSMCE3
5.80993e-15	0.254497	0.406	0.271	1.05816e-10	CD8+ T cells	ANXA6
1.02105e-14	0.279402	0.351	0.217	1.85963e-10	CD8+ T cells	MYO1F
1.13608e-14	0.265219	0.287	0.168	2.06914e-10	CD8+ T cells	ARHGAP45
1.26203e-14	0.255043	0.321	0.199	2.29853e-10	CD8+ T cells	SS18L2
1.35937e-14	0.264851	0.252	0.136	2.47583e-10	CD8+ T cells	AC016831.5
1.55263e-14	0.304666	0.329	0.201	2.82781e-10	CD8+ T cells	CHST12
2.12459e-14	0.276896	0.306	0.184	3.86951e-10	CD8+ T cells	EVI2B
3.66405e-14	0.260103	0.411	0.284	6.67333e-10	CD8+ T cells	LSM8
4.03409e-14	0.267568	0.326	0.2	7.34729e-10	CD8+ T cells	ANKRD13D
9.32972e-14	0.258772	0.266	0.151	1.69922e-09	CD8+ T cells	CCDC88C
1.32265e-13	0.258	0.485	0.356	2.40893e-09	CD8+ T cells	MBNL1
1.46707e-13	0.250157	0.252	0.142	2.67198e-09	CD8+ T cells	IL16
1.96029e-13	0.279539	0.365	0.242	3.57028e-09	CD8+ T cells	GRK2
2.53466e-13	0.271955	0.297	0.181	4.61638e-09	CD8+ T cells	OGT
2.86588e-13	0.251868	0.286	0.171	5.21963e-09	CD8+ T cells	PRKCH
5.25333e-13	0.271536	0.263	0.153	9.56789e-09	CD8+ T cells	PRKCB
7.59473e-13	0.256251	0.274	0.164	1.38323e-08	CD8+ T cells	PPP1R35
9.3679e-13	0.259501	0.289	0.178	1.70618e-08	CD8+ T cells	CSK
6.32737e-12	0.259794	0.38	0.263	1.1524e-07	CD8+ T cells	PCSK7
6.78747e-12	0.264948	0.283	0.176	1.2362e-07	CD8+ T cells	GABARAPL1
1.56565e-11	0.261218	0.342	0.231	2.85153e-07	CD8+ T cells	FAM89B
0	2.75386	0.891	0.177	0	Tumor cells 1	GSTA1
0	2.27464	0.862	0.113	0	Tumor cells 1	CMBL
0	2.2658	0.954	0.236	0	Tumor cells 1	NDUFA4L2
0	2.19485	0.812	0.093	0	Tumor cells 1	BBOX1
0	2.06635	0.799	0.102	0	Tumor cells 1	EGLN3
0	2.06389	0.688	0.05	0	Tumor cells 1	GSTA2
0	2.01654	0.782	0.088	0	Tumor cells 1	BHMT
0	1.94716	0.76	0.072	0	Tumor cells 1	ADSSL1
1.17116e-306	2.45087	0.878	0.169	2.13303e-302	Tumor cells 1	MIOX
3.2433e-297	2.34446	0.856	0.159	5.90703e-293	Tumor cells 1	CRYAB
3.91459e-291	1.79157	0.694	0.069	7.12964e-287	Tumor cells 1	KRT18
4.27657e-279	1.57998	0.594	0.041	7.78891e-275	Tumor cells 1	PDZK1
1.48724e-278	1.99774	0.795	0.129	2.70872e-274	Tumor cells 1	PDZK1IP1
9.53171e-277	1.65191	0.635	0.056	1.73601e-272	Tumor cells 1	RIDA
4.1769e-267	1.7366	0.723	0.094	7.60739e-263	Tumor cells 1	LGALS2
6.68098e-264	1.6692	0.622	0.056	1.21681e-259	Tumor cells 1	KRT8
2.48464e-262	2.16643	0.838	0.189	4.52527e-258	Tumor cells 1	ANXA4
3.79863e-260	1.57528	0.555	0.038	6.91845e-256	Tumor cells 1	AKR7A3
7.41776e-256	1.57713	0.655	0.073	1.351e-251	Tumor cells 1	IMPA2
7.69568e-256	1.70839	0.655	0.074	1.40161e-251	Tumor cells 1	SLC7A7
3.04931e-255	1.43108	0.585	0.048	5.55371e-251	Tumor cells 1	FXYD2
7.7383e-249	2.30337	0.904	0.305	1.40938e-244	Tumor cells 1	CYB5A
2.41847e-245	2.25065	0.945	0.39	4.40476e-241	Tumor cells 1	PLIN2
5.81914e-245	1.59027	0.609	0.059	1.05984e-240	Tumor cells 1	CXCL14
6.05762e-243	1.59942	0.624	0.067	1.10327e-238	Tumor cells 1	GATM
2.41764e-242	1.93091	0.777	0.16	4.40325e-238	Tumor cells 1	BNIP3
2.49105e-241	1.39663	0.502	0.03	4.53696e-237	Tumor cells 1	EGFR-AS1
1.14848e-239	1.35224	0.566	0.048	2.09173e-235	Tumor cells 1	TST
1.48452e-234	1.83424	0.777	0.154	2.70375e-230	Tumor cells 1	CD24
1.50718e-233	1.96555	0.679	0.099	2.74503e-229	Tumor cells 1	NAT8
1.56848e-233	1.8351	0.989	0.874	2.85667e-229	Tumor cells 1	GAPDH
1.41368e-232	2.08564	0.773	0.152	2.57474e-228	Tumor cells 1	RBP4
9.27433e-232	1.56132	0.6	0.064	1.68913e-227	Tumor cells 1	SLC6A13
3.26641e-227	1.54444	0.614	0.07	5.94911e-223	Tumor cells 1	NUPR1
8.66554e-224	1.51478	0.659	0.09	1.57825e-219	Tumor cells 1	ALDH1A1
1.30695e-220	1.26747	0.555	0.054	2.38034e-216	Tumor cells 1	BHMT2
5.69869e-220	1.64782	0.609	0.076	1.0379e-215	Tumor cells 1	EGFR
3.30129e-219	1.437	0.596	0.068	6.01263e-215	Tumor cells 1	MGST1
7.26014e-219	2.26104	0.803	0.204	1.32229e-214	Tumor cells 1	PCK1
6.47098e-216	1.13974	1	0.998	1.17856e-211	Tumor cells 1	TPT1
5.41761e-215	1.65831	0.812	0.214	9.86708e-211	Tumor cells 1	CNDP2
2.14167e-214	1.20535	0.456	0.028	3.90061e-210	Tumor cells 1	FBXO17
4.40151e-214	1.4851	0.675	0.108	8.01648e-210	Tumor cells 1	CAMK2N1
1.2317e-213	1.21728	0.472	0.032	2.2433e-209	Tumor cells 1	PPP1R16A
3.2995e-213	1.63713	0.642	0.091	6.00938e-209	Tumor cells 1	SERPINA1
1.56979e-212	1.49765	0.627	0.085	2.85905e-208	Tumor cells 1	TMEM176A
4.68892e-208	1.57574	0.692	0.129	8.53993e-204	Tumor cells 1	CRYL1
1.01838e-206	2.0724	0.62	0.093	1.85478e-202	Tumor cells 1	FABP1
1.65571e-206	1.41004	0.611	0.086	3.01555e-202	Tumor cells 1	ISOC2
4.15971e-205	1.35254	0.568	0.065	7.57607e-201	Tumor cells 1	ANPEP
3.09104e-201	1.68506	0.729	0.163	5.62971e-197	Tumor cells 1	SH3YL1
1.30231e-199	1.82516	0.88	0.384	2.3719e-195	Tumor cells 1	MIF
2.31291e-199	1.11182	0.404	0.021	4.21249e-195	Tumor cells 1	LINC02274
7.49967e-198	1.03853	0.4	0.021	1.36592e-193	Tumor cells 1	DDC
4.25231e-196	1.88074	0.915	0.541	7.74472e-192	Tumor cells 1	ENO1
1.21515e-195	1.31482	0.526	0.057	2.21316e-191	Tumor cells 1	PTGR1
1.185e-193	1.95071	0.873	0.318	2.15823e-189	Tumor cells 1	GPX3
3.02696e-187	1.41133	0.546	0.071	5.51299e-183	Tumor cells 1	ALDH6A1
7.33558e-187	1.17853	0.421	0.029	1.33603e-182	Tumor cells 1	AOX1
3.55512e-186	1.00217	0.393	0.022	6.47494e-182	Tumor cells 1	ACMSD
1.66969e-185	1.49024	0.878	0.299	3.041e-181	Tumor cells 1	CCND1
3.70268e-185	0.93032	0.998	0.975	6.74369e-181	Tumor cells 1	RPL3
7.08333e-184	1.70043	0.913	0.532	1.29009e-179	Tumor cells 1	PEBP1
9.87084e-183	1.71272	0.836	0.332	1.79778e-178	Tumor cells 1	CHCHD10
1.01575e-182	1.0955	0.496	0.052	1.84999e-178	Tumor cells 1	RAB11FIP3
1.81091e-178	0.872806	0.334	0.013	3.2982e-174	Tumor cells 1	CRYM
3.87561e-177	0.794567	1	0.993	7.05865e-173	Tumor cells 1	EEF1A1
1.77767e-176	0.910883	0.367	0.02	3.23767e-172	Tumor cells 1	RAB17
4.06634e-175	0.924983	0.36	0.019	7.40603e-171	Tumor cells 1	CDK18
7.57465e-175	1.39565	0.731	0.176	1.37957e-170	Tumor cells 1	DAB2
5.02846e-174	0.882124	0.317	0.011	9.15833e-170	Tumor cells 1	HAO2
9.48434e-174	1.13619	0.507	0.062	1.72738e-169	Tumor cells 1	FAHD1
4.93226e-173	1.66486	0.845	0.374	8.98312e-169	Tumor cells 1	PKM
5.23652e-173	1.42263	0.934	0.706	9.53727e-169	Tumor cells 1	EEF2
3.10205e-172	1.50882	0.705	0.18	5.64977e-168	Tumor cells 1	ACAA2
3.54394e-172	1.62591	0.902	0.525	6.45458e-168	Tumor cells 1	TXN
1.04275e-171	1.2513	0.517	0.066	1.89916e-167	Tumor cells 1	GAL3ST1
1.93693e-171	2.72977	0.834	0.351	3.52773e-167	Tumor cells 1	ALDOB
1.10848e-170	1.52459	0.675	0.15	2.01887e-166	Tumor cells 1	KHK
1.86895e-170	1.01544	0.36	0.021	3.40391e-166	Tumor cells 1	LINC02294
4.01646e-170	0.829301	0.325	0.013	7.31518e-166	Tumor cells 1	ECHDC3
6.67044e-170	1.09242	0.386	0.027	1.21489e-165	Tumor cells 1	SLC22A12
1.08837e-167	0.859764	0.334	0.016	1.98224e-163	Tumor cells 1	TYMS
3.25221e-167	1.26617	0.585	0.1	5.92325e-163	Tumor cells 1	C11orf54
5.00727e-167	1.18973	0.448	0.045	9.11974e-163	Tumor cells 1	AK4
1.64194e-166	1.24045	0.491	0.061	2.99046e-162	Tumor cells 1	FBP1
5.57517e-166	1.54825	0.913	0.61	1.01541e-161	Tumor cells 1	LDHA
7.55452e-164	1.70887	0.725	0.222	1.3759e-159	Tumor cells 1	PEPD
3.61012e-162	1.38749	0.6	0.118	6.57512e-158	Tumor cells 1	DHRS4L2
7.92141e-162	1.3382	0.555	0.088	1.44273e-157	Tumor cells 1	AMN
5.16974e-161	1.60005	0.834	0.396	9.41565e-157	Tumor cells 1	DDT
1.06533e-160	1.08418	0.454	0.052	1.94029e-156	Tumor cells 1	MSRB1
1.84808e-160	1.04799	0.443	0.046	3.36591e-156	Tumor cells 1	ACSM2A
1.38217e-159	1.08686	0.5	0.067	2.51734e-155	Tumor cells 1	AKR1C3
4.00332e-159	0.939074	0.33	0.018	7.29124e-155	Tumor cells 1	GLYATL1
3.8658e-156	0.764951	0.319	0.016	7.04078e-152	Tumor cells 1	CDCA2
1.72395e-155	1.51071	0.871	0.533	3.13983e-151	Tumor cells 1	TPI1
5.43422e-154	0.969269	0.33	0.019	9.89734e-150	Tumor cells 1	GPD1
1.41793e-153	0.7886	0.293	0.012	2.58248e-149	Tumor cells 1	CYS1
1.48006e-152	1.05643	0.697	0.168	2.69563e-148	Tumor cells 1	HMOX1
3.37279e-151	0.9489	0.391	0.036	6.14286e-147	Tumor cells 1	LINC01116
7.08876e-150	0.931391	0.404	0.039	1.29108e-145	Tumor cells 1	FAH
4.03475e-149	0.771096	0.301	0.014	7.34849e-145	Tumor cells 1	TMEM139
1.7175e-148	0.716946	0.262	0.007	3.12809e-144	Tumor cells 1	ACY3
2.21409e-148	1.11541	0.513	0.082	4.03253e-144	Tumor cells 1	GCSH
2.58201e-148	1.09798	0.461	0.059	4.70261e-144	Tumor cells 1	TMEM37
2.87913e-148	0.854226	0.354	0.026	5.24375e-144	Tumor cells 1	HSD17B14
1.76921e-146	0.330116	0.996	0.994	3.22226e-142	Tumor cells 1	FTL
4.42924e-146	0.780523	0.303	0.016	8.06698e-142	Tumor cells 1	MAPT
2.16108e-144	1.03565	0.41	0.045	3.93597e-140	Tumor cells 1	SORD
2.25394e-144	1.01727	0.456	0.062	4.1051e-140	Tumor cells 1	TEDC1
2.26434e-144	1.02741	0.395	0.041	4.12404e-140	Tumor cells 1	SHMT1
4.41153e-143	0.94836	0.365	0.032	8.03472e-139	Tumor cells 1	CLEC18A
4.55603e-143	1.37642	0.897	0.657	8.2979e-139	Tumor cells 1	GPX4
1.35852e-142	0.877205	0.297	0.016	2.47426e-138	Tumor cells 1	AC087482.1
1.40392e-142	0.918445	0.365	0.032	2.55697e-138	Tumor cells 1	TP53I3
7.36447e-142	0.969689	0.382	0.038	1.34129e-137	Tumor cells 1	EHHADH
8.03605e-142	0.753979	0.277	0.012	1.46361e-137	Tumor cells 1	GLYAT
7.79804e-140	0.911968	0.317	0.021	1.42026e-135	Tumor cells 1	TMEM174
1.22746e-138	1.4389	0.76	0.321	2.23556e-134	Tumor cells 1	ECH1
4.78047e-136	0.888454	0.328	0.025	8.70668e-132	Tumor cells 1	HPN
5.89248e-136	1.47418	0.751	0.304	1.0732e-131	Tumor cells 1	ETFB
7.01837e-136	1.01495	0.496	0.084	1.27826e-131	Tumor cells 1	MPST
1.74342e-135	0.780707	0.29	0.017	3.17529e-131	Tumor cells 1	AGMAT
4.12907e-135	1.32944	0.697	0.214	7.52028e-131	Tumor cells 1	NDRG1
1.48557e-133	0.828284	0.31	0.021	2.70567e-129	Tumor cells 1	SMIM24
7.5878e-133	0.817602	0.972	0.902	1.38197e-128	Tumor cells 1	RACK1
9.22001e-133	1.35996	0.795	0.371	1.67924e-128	Tumor cells 1	ST13
5.96532e-132	0.883369	0.356	0.034	1.08646e-127	Tumor cells 1	ASRGL1
6.14458e-132	1.34883	0.624	0.153	1.11911e-127	Tumor cells 1	TMEM176B
9.65098e-130	1.10977	0.465	0.077	1.75773e-125	Tumor cells 1	ALDH3A2
1.3356e-129	0.842992	0.321	0.026	2.43253e-125	Tumor cells 1	AGXT2
1.90753e-128	0.797633	0.288	0.018	3.47418e-124	Tumor cells 1	DPYS
3.35187e-128	1.1471	0.579	0.134	6.10476e-124	Tumor cells 1	CYSTM1
8.36764e-128	1.42192	0.801	0.414	1.524e-123	Tumor cells 1	PRDX2
3.76874e-127	0.672235	0.273	0.015	6.86401e-123	Tumor cells 1	LINC01320
4.58363e-127	0.687548	0.286	0.018	8.34817e-123	Tumor cells 1	PRODH2
2.54126e-126	0.906817	0.354	0.037	4.6284e-122	Tumor cells 1	QPRT
6.31559e-125	0.721368	0.258	0.013	1.15026e-120	Tumor cells 1	FTCD
1.57929e-122	1.10726	0.893	0.751	2.87636e-118	Tumor cells 1	HINT1
6.9657e-122	0.796707	0.277	0.018	1.26866e-117	Tumor cells 1	A1CF
1.50531e-121	1.3318	0.784	0.382	2.74161e-117	Tumor cells 1	HSPD1
2.04811e-121	0.710876	0.303	0.024	3.73022e-117	Tumor cells 1	SPAG4
5.59114e-121	0.796234	0.286	0.021	1.01831e-116	Tumor cells 1	C19orf33
2.76763e-120	0.887649	0.323	0.031	5.04068e-116	Tumor cells 1	HRH2
9.91221e-119	1.14049	0.721	0.24	1.80531e-114	Tumor cells 1	ADIRF
1.26196e-118	1.16733	0.55	0.134	2.29841e-114	Tumor cells 1	SEPHS2
1.62293e-118	0.692873	0.266	0.017	2.95584e-114	Tumor cells 1	CLDN10
3.95923e-118	0.945537	0.91	0.743	7.21094e-114	Tumor cells 1	COX7C
1.54602e-117	0.843918	0.362	0.045	2.81576e-113	Tumor cells 1	BPHL
6.98742e-117	0.995024	0.439	0.074	1.27262e-112	Tumor cells 1	HSDL2
1.15689e-116	0.948963	0.393	0.055	2.10704e-112	Tumor cells 1	KCNMA1
1.16744e-116	1.08066	0.4	0.057	2.12626e-112	Tumor cells 1	ANGPTL4
7.93146e-116	1.00605	0.627	0.175	1.44456e-111	Tumor cells 1	BLVRB
1.46464e-115	0.739137	0.319	0.031	2.66754e-111	Tumor cells 1	NOL3
1.02859e-114	0.789423	0.288	0.023	1.87337e-110	Tumor cells 1	SLC28A1
2.04748e-114	0.880089	0.332	0.036	3.72908e-110	Tumor cells 1	CA9
1.17309e-113	0.632175	0.985	0.961	2.13654e-109	Tumor cells 1	RPS6
5.4406e-113	1.30608	0.797	0.468	9.90897e-109	Tumor cells 1	PGK1
8.2539e-113	1.29907	0.701	0.285	1.50328e-108	Tumor cells 1	GLRX
1.30368e-112	0.977448	0.463	0.088	2.3744e-108	Tumor cells 1	CBR1
1.33668e-112	0.996656	0.485	0.099	2.43449e-108	Tumor cells 1	GAMT
1.52918e-112	0.996361	0.38	0.053	2.7851e-108	Tumor cells 1	HILPDA
6.04948e-112	1.17019	0.509	0.115	1.10179e-107	Tumor cells 1	HCFC1R1
5.58679e-111	1.17256	0.819	0.478	1.01752e-106	Tumor cells 1	HSPE1
8.33135e-110	1.25563	0.572	0.166	1.51739e-105	Tumor cells 1	AKR7A2
1.03878e-109	0.749681	0.297	0.028	1.89193e-105	Tumor cells 1	PBLD
1.28693e-109	1.185	0.592	0.18	2.34389e-105	Tumor cells 1	DNPH1
4.45269e-109	1.20494	0.657	0.237	8.10968e-105	Tumor cells 1	AKR1A1
7.6151e-109	1.01014	0.478	0.1	1.38694e-104	Tumor cells 1	SLC25A1
8.73698e-109	0.744934	0.954	0.846	1.59127e-104	Tumor cells 1	RPLP0
1.46762e-108	0.922992	0.941	0.829	2.67297e-104	Tumor cells 1	EEF1B2
1.79462e-108	0.764088	0.297	0.029	3.26855e-104	Tumor cells 1	DECR2
6.99073e-108	0.87177	0.919	0.855	1.27322e-103	Tumor cells 1	RPL23
9.55485e-108	1.10158	0.541	0.131	1.74023e-103	Tumor cells 1	MGLL
6.3164e-107	1.22838	0.594	0.183	1.15041e-102	Tumor cells 1	ACAA1
6.52864e-107	1.0651	0.404	0.067	1.18906e-102	Tumor cells 1	APOM
1.87947e-106	0.815147	0.369	0.052	3.42307e-102	Tumor cells 1	HNMT
2.45145e-106	0.678306	0.264	0.021	4.46483e-102	Tumor cells 1	CCDC198
3.65415e-106	0.921093	0.421	0.076	6.65531e-102	Tumor cells 1	QDPR
6.7682e-106	0.893894	0.317	0.037	1.23269e-101	Tumor cells 1	CRYZ
1.77987e-105	1.11171	0.821	0.545	3.24168e-101	Tumor cells 1	ATP5F1D
6.08665e-105	0.995561	0.544	0.144	1.10856e-100	Tumor cells 1	COA3
1.25459e-104	0.925179	0.445	0.088	2.28499e-100	Tumor cells 1	PMM1
2.59376e-103	1.07437	0.788	0.426	4.72402e-99	Tumor cells 1	BRI3
2.883e-103	0.970856	0.476	0.106	5.25081e-99	Tumor cells 1	NIT2
4.34018e-103	1.10095	0.823	0.584	7.90477e-99	Tumor cells 1	SOD1
1.57524e-101	1.01302	0.397	0.068	2.86898e-97	Tumor cells 1	SLC3A1
4.45138e-101	0.689561	0.258	0.021	8.1073e-97	Tumor cells 1	AP003716.1
1.37301e-100	0.856131	0.463	0.094	2.50067e-96	Tumor cells 1	RBP5
2.19145e-100	0.817462	0.299	0.033	3.99129e-96	Tumor cells 1	DDAH1
5.53262e-100	1.1657	0.721	0.339	1.00766e-95	Tumor cells 1	PGAM1
3.025e-99	0.90531	0.347	0.05	5.50943e-95	Tumor cells 1	UGT2B7
1.92116e-98	0.910615	0.417	0.079	3.499e-94	Tumor cells 1	GUCD1
1.84093e-97	0.646993	0.286	0.031	3.35289e-93	Tumor cells 1	MORN2
5.34454e-97	1.04244	0.557	0.165	9.734e-93	Tumor cells 1	GPI
9.20693e-97	0.957325	0.474	0.112	1.67686e-92	Tumor cells 1	ACAT1
1.05881e-96	0.562352	0.991	0.964	1.92841e-92	Tumor cells 1	RPS28
2.93915e-96	0.665416	0.264	0.025	5.35307e-92	Tumor cells 1	SLC22A2
3.05704e-95	1.13834	0.662	0.288	5.56778e-91	Tumor cells 1	VDAC1
6.90173e-95	1.18544	0.675	0.294	1.25701e-90	Tumor cells 1	PLA2G16
1.03167e-94	1.19884	0.369	0.064	1.87898e-90	Tumor cells 1	NNMT
2.25752e-93	0.685297	0.284	0.032	4.11162e-89	Tumor cells 1	SLC37A4
5.09315e-92	0.746098	0.345	0.054	9.27615e-88	Tumor cells 1	SNHG19
6.09883e-92	0.715768	0.288	0.035	1.11078e-87	Tumor cells 1	MVK
2.50187e-91	1.14978	0.679	0.302	4.55665e-87	Tumor cells 1	PHPT1
2.61944e-91	0.912679	0.459	0.108	4.77078e-87	Tumor cells 1	NUDT14
3.03637e-91	0.807522	0.386	0.072	5.53014e-87	Tumor cells 1	PHYH
3.65884e-91	0.931123	0.4	0.08	6.66384e-87	Tumor cells 1	NAPRT
4.9345e-91	0.951577	0.478	0.124	8.98721e-87	Tumor cells 1	GRHPR
5.04555e-91	0.84153	0.253	0.025	9.18946e-87	Tumor cells 1	PCSK1N
7.16665e-91	1.07278	0.59	0.205	1.30526e-86	Tumor cells 1	HADHB
3.35938e-90	0.851296	0.323	0.048	6.11844e-86	Tumor cells 1	LEAP2
1.01511e-89	0.57408	0.255	0.025	1.84882e-85	Tumor cells 1	MAOB
1.02822e-89	0.903062	0.434	0.099	1.87271e-85	Tumor cells 1	PCBD1
2.03582e-89	0.733358	0.279	0.034	3.70784e-85	Tumor cells 1	SMPDL3A
6.89213e-89	0.787797	0.345	0.057	1.25526e-84	Tumor cells 1	FARP1
8.42386e-87	0.632155	0.271	0.032	1.53424e-82	Tumor cells 1	NR2F6
1.37005e-85	0.89382	0.415	0.094	2.49527e-81	Tumor cells 1	PFKP
2.4026e-84	1.10098	0.747	0.469	4.37585e-80	Tumor cells 1	PRELID1
3.18848e-84	0.381754	0.996	0.988	5.80719e-80	Tumor cells 1	FTH1
4.70919e-84	1.04922	0.762	0.493	8.57684e-80	Tumor cells 1	ATP5MC3
1.76155e-83	0.751278	0.299	0.044	3.20831e-79	Tumor cells 1	HIBADH
6.09874e-83	1.03447	0.452	0.114	1.11076e-78	Tumor cells 1	ATP1B1
4.50568e-82	1.00445	0.598	0.224	8.20619e-78	Tumor cells 1	BNIP3L
2.50859e-81	0.807346	0.347	0.064	4.56889e-77	Tumor cells 1	DHRS4-AS1
5.1306e-81	1.03472	0.668	0.321	9.34437e-77	Tumor cells 1	HMGN3
5.20186e-81	0.689585	0.321	0.053	9.47414e-77	Tumor cells 1	MLYCD
1.12767e-79	1.20362	0.718	0.365	2.05382e-75	Tumor cells 1	LGALS3
2.30201e-79	1.24526	0.485	0.139	4.19265e-75	Tumor cells 1	SPP1
3.07994e-79	0.883242	0.4	0.093	5.6095e-75	Tumor cells 1	MSRA
3.84776e-79	0.823275	0.413	0.099	7.00793e-75	Tumor cells 1	AP1S1
8.02794e-79	0.712058	0.362	0.072	1.46213e-74	Tumor cells 1	MCRIP2
2.20108e-78	1.01297	0.692	0.358	4.00884e-74	Tumor cells 1	LAMTOR5
6.33583e-78	0.534057	0.959	0.926	1.15395e-73	Tumor cells 1	RPL37A
6.5122e-78	0.717071	0.258	0.034	1.18607e-73	Tumor cells 1	TKFC
8.0624e-78	0.629103	0.275	0.039	1.4684e-73	Tumor cells 1	TRIP6
4.61953e-77	0.748788	0.867	0.776	8.41356e-73	Tumor cells 1	RPL36AL
9.26118e-77	0.548787	0.969	0.944	1.68674e-72	Tumor cells 1	RPL12
1.91523e-76	0.693347	0.282	0.042	3.48821e-72	Tumor cells 1	ACO1
2.80085e-76	0.790876	0.537	0.166	5.10119e-72	Tumor cells 1	TPM1
1.28186e-75	0.895501	0.541	0.194	2.33465e-71	Tumor cells 1	ESD
2.01924e-75	0.882896	0.819	0.623	3.67765e-71	Tumor cells 1	PPDPF
2.07338e-75	0.595873	0.303	0.051	3.77625e-71	Tumor cells 1	NEK6
2.15867e-75	0.898145	0.465	0.137	3.93159e-71	Tumor cells 1	ECI2
2.28561e-75	0.990753	0.546	0.203	4.16278e-71	Tumor cells 1	ECHS1
4.18688e-75	0.91997	0.413	0.102	7.62557e-71	Tumor cells 1	CES2
2.49438e-74	0.690936	0.251	0.033	4.54301e-70	Tumor cells 1	SLC16A4
1.39318e-73	0.710993	0.299	0.052	2.53741e-69	Tumor cells 1	EPS8L2
2.52426e-73	0.830783	0.45	0.127	4.59744e-69	Tumor cells 1	CCNG1
3.11592e-73	0.776913	0.865	0.735	5.67503e-69	Tumor cells 1	NPM1
3.75784e-73	0.765638	0.367	0.082	6.84416e-69	Tumor cells 1	TPMT
3.81628e-73	0.927379	0.603	0.259	6.95059e-69	Tumor cells 1	NDUFC1
6.26299e-73	0.738719	0.286	0.047	1.14068e-68	Tumor cells 1	TMCC1
7.51685e-73	0.877014	0.303	0.053	1.36904e-68	Tumor cells 1	GDF15
1.08156e-72	0.614751	0.253	0.035	1.96984e-68	Tumor cells 1	FAM13A
1.47063e-72	0.908349	0.441	0.124	2.67846e-68	Tumor cells 1	ACO2
1.98689e-72	0.606361	0.282	0.044	3.61872e-68	Tumor cells 1	CSRP2
5.55637e-72	0.855574	0.391	0.094	1.01198e-67	Tumor cells 1	CXXC5
8.01625e-72	0.990693	0.742	0.5	1.46e-67	Tumor cells 1	C4orf3
2.72966e-71	0.711035	0.277	0.045	4.97152e-67	Tumor cells 1	LACTB2
3.60081e-71	0.766122	0.469	0.141	6.55816e-67	Tumor cells 1	ECI1
6.03767e-71	0.827823	0.836	0.718	1.09964e-66	Tumor cells 1	RPS4Y1
1.01488e-70	0.962334	0.378	0.094	1.8484e-66	Tumor cells 1	HIST1H1C
1.33626e-70	0.980673	0.303	0.057	2.43373e-66	Tumor cells 1	AOC1
3.29257e-70	1.02907	0.55	0.221	5.99677e-66	Tumor cells 1	TXNDC17
2.04708e-69	1.03837	0.672	0.38	3.72834e-65	Tumor cells 1	SIVA1
8.3073e-69	0.63037	0.275	0.046	1.51301e-64	Tumor cells 1	PRR34-AS1
1.59975e-68	0.966949	0.742	0.517	2.91362e-64	Tumor cells 1	ATP5PF
7.0752e-68	0.784672	0.825	0.652	1.28861e-63	Tumor cells 1	RPL31
8.67393e-68	0.95794	0.528	0.201	1.57978e-63	Tumor cells 1	CFDP1
1.81407e-67	1.02209	0.653	0.353	3.30396e-63	Tumor cells 1	UQCRQ
1.9234e-67	0.876574	0.483	0.159	3.50309e-63	Tumor cells 1	ADI1
2.4668e-67	0.49926	0.974	0.936	4.49279e-63	Tumor cells 1	RPL37
5.29874e-67	0.400321	1	0.993	9.6506e-63	Tumor cells 1	RPL13
3.40561e-66	0.701106	0.29	0.055	6.20264e-62	Tumor cells 1	TRAP1
3.66227e-66	0.677484	0.286	0.053	6.6701e-62	Tumor cells 1	MTHFS
1.3277e-65	1.00354	0.838	0.713	2.41813e-61	Tumor cells 1	S100A10
3.47448e-64	0.842083	0.659	0.319	6.32807e-60	Tumor cells 1	HSPB1
4.8014e-64	0.871379	0.502	0.184	8.7448e-60	Tumor cells 1	SUCLG1
7.20759e-64	1.00327	0.622	0.316	1.31272e-59	Tumor cells 1	PDCD6
1.02225e-63	0.846523	0.557	0.225	1.86182e-59	Tumor cells 1	SLC9A3R1
1.40227e-63	0.903991	0.677	0.406	2.55396e-59	Tumor cells 1	PRDX5
5.63081e-63	0.660976	0.332	0.076	1.02554e-58	Tumor cells 1	DERA
7.31444e-63	0.841306	0.474	0.166	1.33218e-58	Tumor cells 1	TMEM141
8.13211e-63	0.65832	0.251	0.041	1.4811e-58	Tumor cells 1	KSR1
9.28351e-63	0.880531	0.749	0.509	1.69081e-58	Tumor cells 1	LDHB
3.38021e-62	0.869208	0.478	0.17	6.15638e-58	Tumor cells 1	MVP
6.9537e-62	0.947669	0.271	0.05	1.26648e-57	Tumor cells 1	LRP2
1.04789e-61	0.521087	0.924	0.903	1.90852e-57	Tumor cells 1	RPL35
1.21074e-61	0.508808	0.941	0.911	2.20512e-57	Tumor cells 1	RPS11
2.84507e-61	0.870147	0.734	0.48	5.18173e-57	Tumor cells 1	SELENOW
7.29637e-61	0.791404	0.428	0.14	1.32889e-56	Tumor cells 1	MRPL40
8.42437e-61	0.693597	0.282	0.055	1.53433e-56	Tumor cells 1	ACSL1
1.23819e-60	0.598802	0.31	0.067	2.25512e-56	Tumor cells 1	NIPSNAP1
5.66345e-60	0.843416	0.465	0.167	1.03148e-55	Tumor cells 1	TIMM13
1.14445e-59	0.872723	0.513	0.205	2.08438e-55	Tumor cells 1	EIF6
1.29565e-59	0.717224	0.417	0.13	2.35976e-55	Tumor cells 1	HINT2
3.08339e-59	0.607536	0.306	0.068	5.61579e-55	Tumor cells 1	SHMT2
4.71082e-59	0.657574	0.323	0.075	8.57981e-55	Tumor cells 1	GNPDA1
1.50409e-58	0.899681	0.563	0.266	2.73939e-54	Tumor cells 1	MDH1
1.99891e-58	0.414631	0.98	0.965	3.64062e-54	Tumor cells 1	RPS23
2.21052e-58	0.454984	0.987	0.947	4.02602e-54	Tumor cells 1	RPL7A
6.35982e-58	0.801495	0.749	0.522	1.15831e-53	Tumor cells 1	RPS27L
2.4955e-57	0.643909	0.867	0.786	4.54505e-53	Tumor cells 1	PPIA
1.34901e-56	0.621063	0.332	0.084	2.45695e-52	Tumor cells 1	TIMM9
1.4085e-56	0.824	0.443	0.156	2.5653e-52	Tumor cells 1	CAT
1.56668e-56	0.791884	0.491	0.191	2.85339e-52	Tumor cells 1	PRDX3
2.26696e-56	0.706759	0.795	0.676	4.12882e-52	Tumor cells 1	SLC25A6
2.33639e-56	0.768454	0.4	0.124	4.25527e-52	Tumor cells 1	ACADM
5.58105e-56	0.576244	0.913	0.865	1.01648e-51	Tumor cells 1	RPS5
1.38048e-55	0.815617	0.668	0.403	2.51427e-51	Tumor cells 1	ATP5PD
2.68923e-55	0.696111	0.358	0.099	4.89789e-51	Tumor cells 1	SPATS2L
5.3855e-55	0.777339	0.725	0.528	9.8086e-51	Tumor cells 1	MZT2B
1.01067e-54	0.779672	0.528	0.207	1.84074e-50	Tumor cells 1	RHOB
1.06535e-54	0.978932	0.511	0.202	1.94032e-50	Tumor cells 1	HIPK2
2.12261e-54	0.85044	0.659	0.402	3.86592e-50	Tumor cells 1	SEC61G
4.70366e-54	0.667762	0.657	0.336	8.56677e-50	Tumor cells 1	NPC2
9.32923e-54	0.70674	0.487	0.185	1.69913e-49	Tumor cells 1	PSMB5
1.43211e-53	0.654537	0.349	0.096	2.6083e-49	Tumor cells 1	ALDH2
1.6241e-53	0.86652	0.697	0.472	2.95797e-49	Tumor cells 1	UQCR10
1.68396e-53	0.550994	0.928	0.897	3.067e-49	Tumor cells 1	CALM1
4.21454e-53	0.83554	0.515	0.226	7.67594e-49	Tumor cells 1	FAM162A
1.33873e-52	0.681746	0.393	0.126	2.43823e-48	Tumor cells 1	GMPR2
5.61164e-52	0.491953	0.906	0.895	1.02205e-47	Tumor cells 1	SERF2
2.40142e-51	0.740407	0.644	0.365	4.37371e-47	Tumor cells 1	CLTA
2.91812e-51	0.80494	0.493	0.209	5.31478e-47	Tumor cells 1	POLR2E
3.6187e-51	0.672742	0.314	0.083	6.59074e-47	Tumor cells 1	CISD1
4.04891e-51	0.97833	0.631	0.371	7.37427e-47	Tumor cells 1	TUBB4B
6.61418e-51	0.852939	0.6	0.321	1.20464e-46	Tumor cells 1	OCIAD2
2.0767e-50	0.726146	0.45	0.167	3.78229e-46	Tumor cells 1	SMS
6.82695e-50	0.750288	0.561	0.278	1.24339e-45	Tumor cells 1	METTL9
1.36882e-49	0.651907	0.443	0.163	2.49304e-45	Tumor cells 1	MRPL27
3.21333e-49	0.568021	0.279	0.067	5.85243e-45	Tumor cells 1	POLD2
3.92489e-49	0.774059	0.627	0.349	7.14841e-45	Tumor cells 1	NSA2
8.89086e-49	0.84335	0.677	0.45	1.61929e-44	Tumor cells 1	SLC25A5
2.17054e-48	0.846981	0.362	0.115	3.95321e-44	Tumor cells 1	SPINT2
3.86255e-48	0.596669	0.299	0.079	7.03486e-44	Tumor cells 1	MRPL12
5.48903e-48	0.805966	0.662	0.441	9.99717e-44	Tumor cells 1	TBCA
1.15586e-47	0.834578	0.472	0.202	2.10517e-43	Tumor cells 1	METTL26
1.89423e-47	0.744148	0.452	0.18	3.44995e-43	Tumor cells 1	SLIRP
3.07042e-47	0.72223	0.736	0.553	5.59216e-43	Tumor cells 1	SEC61B
3.14727e-47	0.663692	0.404	0.149	5.73212e-43	Tumor cells 1	STOML2
4.28227e-47	0.881672	0.537	0.266	7.7993e-43	Tumor cells 1	ATP5MC1
6.47754e-47	0.622044	0.269	0.066	1.17975e-42	Tumor cells 1	PACSIN2
8.72466e-47	0.765928	0.465	0.194	1.58902e-42	Tumor cells 1	SAT2
8.88594e-47	0.777715	0.526	0.247	1.6184e-42	Tumor cells 1	IDH2
3.75173e-46	0.646058	0.819	0.686	6.83303e-42	Tumor cells 1	NOP53
5.11084e-46	0.619236	0.421	0.148	9.30836e-42	Tumor cells 1	PDLIM1
5.15683e-46	0.687281	0.338	0.104	9.39213e-42	Tumor cells 1	ACLY
2.0515e-45	0.741113	0.642	0.403	3.73639e-41	Tumor cells 1	ATP6V1F
3.33163e-45	0.764259	0.469	0.2	6.06789e-41	Tumor cells 1	DARS
4.94748e-45	0.634934	0.264	0.066	9.01085e-41	Tumor cells 1	C11orf1
6.46035e-45	0.743884	0.581	0.322	1.17662e-40	Tumor cells 1	GADD45GIP1
1.87855e-44	0.538915	0.397	0.135	3.42141e-40	Tumor cells 1	TCEAL4
4.37154e-44	0.442057	0.906	0.876	7.96189e-40	Tumor cells 1	RPL7
5.52076e-44	0.777853	0.448	0.19	1.0055e-39	Tumor cells 1	SDHA
5.63153e-44	0.724794	0.352	0.111	1.02567e-39	Tumor cells 1	CLU
9.94591e-44	0.748777	0.472	0.203	1.81145e-39	Tumor cells 1	MMP24OS
1.38789e-43	0.6832	0.389	0.143	2.52776e-39	Tumor cells 1	OLA1
2.20521e-43	0.697492	0.448	0.191	4.01635e-39	Tumor cells 1	MPC1
3.84939e-43	0.602631	0.29	0.082	7.01089e-39	Tumor cells 1	BDH2
1.95727e-42	0.681633	0.29	0.081	3.56478e-38	Tumor cells 1	RCAN1
2.61896e-42	0.728904	0.59	0.33	4.76991e-38	Tumor cells 1	PRDX6
3.16238e-42	0.368596	0.983	0.958	5.75964e-38	Tumor cells 1	RPL13A
4.53633e-42	0.695841	0.736	0.593	8.26201e-38	Tumor cells 1	COX6B1
5.65613e-42	0.42752	0.352	0.108	1.03015e-37	Tumor cells 1	S100A16
7.04477e-42	0.759033	0.437	0.188	1.28306e-37	Tumor cells 1	RPA3
9.54127e-42	0.623618	0.31	0.095	1.73775e-37	Tumor cells 1	SNX10
1.11492e-41	0.433794	0.919	0.884	2.0306e-37	Tumor cells 1	RPS20
1.57019e-41	0.686991	0.507	0.244	2.85978e-37	Tumor cells 1	ADH5
1.6479e-41	0.689471	0.474	0.216	3.00132e-37	Tumor cells 1	MRPL34
2.25345e-41	0.510665	0.253	0.064	4.10422e-37	Tumor cells 1	OAS1
4.96412e-41	0.650952	0.764	0.681	9.04114e-37	Tumor cells 1	EDF1
5.34438e-41	0.589077	0.29	0.084	9.73372e-37	Tumor cells 1	SETD3
1.0578e-40	0.666839	0.432	0.177	1.92657e-36	Tumor cells 1	RAB1A
1.46537e-40	0.570661	0.275	0.074	2.66888e-36	Tumor cells 1	ACOT7
1.51679e-40	0.566066	0.369	0.13	2.76253e-36	Tumor cells 1	NQO2
1.60175e-40	0.726535	0.535	0.283	2.91726e-36	Tumor cells 1	MPC2
3.88903e-40	0.670626	0.347	0.121	7.08309e-36	Tumor cells 1	GCHFR
8.27319e-40	0.373193	0.961	0.936	1.5068e-35	Tumor cells 1	RPS9
1.09888e-39	0.527551	0.371	0.129	2.00139e-35	Tumor cells 1	VEGFA
1.14636e-39	0.688093	0.461	0.206	2.08786e-35	Tumor cells 1	SDHC
2.23848e-39	0.500091	0.288	0.086	4.07694e-35	Tumor cells 1	NME1
4.36289e-39	0.648477	0.437	0.189	7.94613e-35	Tumor cells 1	APEX1
9.81038e-39	0.580307	0.524	0.243	1.78676e-34	Tumor cells 1	CEBPD
2.68933e-38	0.475773	0.854	0.792	4.89807e-34	Tumor cells 1	COX4I1
4.97145e-38	0.463438	0.271	0.078	9.05451e-34	Tumor cells 1	COPRS
6.73162e-38	0.728352	0.509	0.271	1.22603e-33	Tumor cells 1	NDUFA5
6.97963e-38	0.365399	0.956	0.928	1.2712e-33	Tumor cells 1	RPL29
8.65425e-38	0.686037	0.48	0.241	1.5762e-33	Tumor cells 1	PSMB7
1.43926e-37	0.641562	0.456	0.207	2.62132e-33	Tumor cells 1	TRAPPC2L
3.6953e-37	0.619325	0.321	0.111	6.73024e-33	Tumor cells 1	ACOT13
3.98834e-37	0.322966	0.978	0.943	7.26397e-33	Tumor cells 1	RPS15
9.6843e-37	0.485557	0.823	0.777	1.7638e-32	Tumor cells 1	BTF3
1.05374e-36	0.557817	0.306	0.1	1.91918e-32	Tumor cells 1	AK3
1.66904e-36	0.659016	0.541	0.296	3.03983e-32	Tumor cells 1	MRPL57
1.88028e-36	0.259373	0.513	0.224	3.42455e-32	Tumor cells 1	CALD1
2.55882e-36	0.558935	0.295	0.095	4.66038e-32	Tumor cells 1	AK2
5.06742e-36	0.676046	0.456	0.223	9.22929e-32	Tumor cells 1	IGBP1
7.23385e-36	0.586275	0.432	0.177	1.3175e-31	Tumor cells 1	ETS2
7.28962e-36	0.409501	0.908	0.898	1.32766e-31	Tumor cells 1	UBC
1.05172e-35	0.706953	0.555	0.327	1.91549e-31	Tumor cells 1	SCP2
1.98794e-35	0.658121	0.59	0.363	3.62063e-31	Tumor cells 1	GSTO1
2.15518e-35	0.611669	0.358	0.139	3.92523e-31	Tumor cells 1	PMVK
4.28403e-35	0.561122	0.299	0.1	7.80251e-31	Tumor cells 1	ATP6V1B2
5.96214e-35	0.599153	0.459	0.223	1.08588e-30	Tumor cells 1	GLRX5
6.71757e-35	0.713923	0.539	0.314	1.22347e-30	Tumor cells 1	C19orf70
1.07415e-34	0.662733	0.62	0.417	1.95635e-30	Tumor cells 1	FIS1
1.19836e-34	0.374529	0.362	0.13	2.18257e-30	Tumor cells 1	CD68
1.31203e-34	0.621238	0.428	0.194	2.3896e-30	Tumor cells 1	MRPS36
1.37453e-34	0.561	0.299	0.101	2.50343e-30	Tumor cells 1	MSRB2
1.89167e-34	0.675489	0.611	0.415	3.44531e-30	Tumor cells 1	ATP5MPL
3.54624e-34	0.495003	0.841	0.759	6.45877e-30	Tumor cells 1	RPL4
3.92289e-34	0.573826	0.373	0.15	7.14476e-30	Tumor cells 1	ARPC1A
4.33048e-34	0.535898	0.321	0.116	7.8871e-30	Tumor cells 1	KLHDC2
5.09303e-34	0.540328	0.397	0.169	9.27594e-30	Tumor cells 1	PFKL
5.93388e-34	0.726202	0.566	0.355	1.08074e-29	Tumor cells 1	SCAND1
6.51074e-34	0.363191	0.95	0.918	1.1858e-29	Tumor cells 1	RPS16
9.74434e-34	0.582172	0.378	0.156	1.77474e-29	Tumor cells 1	RRAGA
1.15989e-33	0.658453	0.629	0.436	2.11251e-29	Tumor cells 1	NDUFB7
1.33696e-33	0.664774	0.662	0.473	2.43501e-29	Tumor cells 1	PCBP1
1.57928e-33	0.597937	0.384	0.163	2.87634e-29	Tumor cells 1	PNP
2.20132e-33	0.543923	0.354	0.139	4.00927e-29	Tumor cells 1	RABGGTB
2.75639e-33	0.73026	0.493	0.264	5.02021e-29	Tumor cells 1	HSPA9
2.98174e-33	0.676045	0.452	0.221	5.43064e-29	Tumor cells 1	RNF181
3.63313e-33	0.459749	0.273	0.085	6.61701e-29	Tumor cells 1	RBPMS
4.91759e-33	0.777773	0.633	0.432	8.95641e-29	Tumor cells 1	LY6E
6.68788e-33	0.692718	0.515	0.286	1.21806e-28	Tumor cells 1	NDUFB1
1.84412e-32	0.536616	0.38	0.161	3.3587e-28	Tumor cells 1	ATP6V1D
2.24593e-32	0.567974	0.306	0.11	4.09052e-28	Tumor cells 1	PGRMC1
2.34924e-32	0.621066	0.434	0.21	4.27867e-28	Tumor cells 1	NDUFA10
5.66886e-32	0.520499	0.788	0.722	1.03247e-27	Tumor cells 1	UQCRB
7.01399e-32	0.546933	0.269	0.087	1.27746e-27	Tumor cells 1	BCL2L1
7.96495e-32	0.67215	0.605	0.42	1.45066e-27	Tumor cells 1	ATP5PO
1.0867e-31	0.515996	0.314	0.117	1.97921e-27	Tumor cells 1	COA5
1.1706e-31	0.636168	0.528	0.32	2.132e-27	Tumor cells 1	NDUFAB1
1.4967e-31	0.673806	0.568	0.374	2.72595e-27	Tumor cells 1	SMDT1
1.82836e-31	0.575904	0.266	0.085	3.33e-27	Tumor cells 1	TNS1
2.21041e-31	0.57119	0.413	0.192	4.02581e-27	Tumor cells 1	NDUFB6
2.22237e-31	0.523667	0.253	0.081	4.0476e-27	Tumor cells 1	ENOSF1
3.50978e-31	0.349256	0.913	0.895	6.39237e-27	Tumor cells 1	NACA
3.83531e-31	0.568634	0.463	0.237	6.98525e-27	Tumor cells 1	CHMP2A
7.05821e-31	0.534843	0.596	0.365	1.28551e-26	Tumor cells 1	DSTN
7.24553e-31	0.708193	0.266	0.089	1.31963e-26	Tumor cells 1	AQP1
7.97917e-31	0.590323	0.378	0.165	1.45325e-26	Tumor cells 1	ETFA
8.22262e-31	0.703088	0.563	0.353	1.49759e-26	Tumor cells 1	SNHG8
9.36212e-31	0.417862	0.328	0.118	1.70512e-26	Tumor cells 1	CAVIN3
1.07555e-30	0.571382	0.332	0.132	1.95891e-26	Tumor cells 1	MRPS26
1.52233e-30	0.561966	0.277	0.096	2.77262e-26	Tumor cells 1	AGPAT3
1.94667e-30	0.601258	0.386	0.174	3.54546e-26	Tumor cells 1	COA4
3.33956e-30	0.534115	0.362	0.155	6.08234e-26	Tumor cells 1	VTI1B
3.90028e-30	0.579233	0.264	0.088	7.10358e-26	Tumor cells 1	SCRN2
5.55399e-30	0.53513	0.358	0.154	1.01155e-25	Tumor cells 1	MRPS33
7.71821e-30	0.58903	0.476	0.26	1.40572e-25	Tumor cells 1	NDUFA6
1.09588e-29	0.624228	0.749	0.652	1.99592e-25	Tumor cells 1	CIRBP
1.25549e-29	0.496662	0.255	0.083	2.28662e-25	Tumor cells 1	IVD
1.40425e-29	0.612273	0.369	0.156	2.55756e-25	Tumor cells 1	CTNNA1
1.70879e-29	0.661506	0.524	0.33	3.11222e-25	Tumor cells 1	COX7A2L
2.27672e-29	0.578553	0.463	0.232	4.14658e-25	Tumor cells 1	ATOX1
2.45165e-29	0.68483	0.432	0.227	4.46519e-25	Tumor cells 1	DCXR
2.87754e-29	0.61469	0.614	0.426	5.24086e-25	Tumor cells 1	DYNLRB1
3.00923e-29	0.520632	0.277	0.097	5.48071e-25	Tumor cells 1	TTC38
4.2478e-29	0.613858	0.531	0.324	7.73652e-25	Tumor cells 1	LSM3
4.98985e-29	0.568589	0.314	0.124	9.088e-25	Tumor cells 1	DMAC1
5.29059e-29	0.570767	0.454	0.238	9.63574e-25	Tumor cells 1	GTF3C6
5.72036e-29	0.537914	0.758	0.7	1.04185e-24	Tumor cells 1	ATP5MC2
9.95414e-29	0.5716	0.69	0.581	1.81295e-24	Tumor cells 1	COX5B
1.35741e-28	0.26645	0.303	0.114	2.47226e-24	Tumor cells 1	G0S2
1.67085e-28	0.386125	0.367	0.153	3.04311e-24	Tumor cells 1	BEX3
2.48736e-28	0.566946	0.443	0.231	4.53023e-24	Tumor cells 1	MRPL52
2.63137e-28	0.597501	0.515	0.305	4.79252e-24	Tumor cells 1	RPS19BP1
2.65847e-28	0.570547	0.454	0.241	4.84186e-24	Tumor cells 1	PHB
3.17585e-28	0.55404	0.555	0.349	5.78417e-24	Tumor cells 1	MZT2A
3.51238e-28	0.557206	0.683	0.541	6.3971e-24	Tumor cells 1	EID1
4.31355e-28	0.515973	0.26	0.091	7.85627e-24	Tumor cells 1	IMPDH2
5.80812e-28	0.30899	0.959	0.936	1.05783e-23	Tumor cells 1	RPL8
6.33583e-28	0.596595	0.662	0.506	1.15395e-23	Tumor cells 1	NDUFB2
8.44064e-28	0.465849	0.273	0.098	1.53729e-23	Tumor cells 1	SAMM50
1.36898e-27	0.582293	0.378	0.176	2.49333e-23	Tumor cells 1	C7orf50
3.13117e-27	0.554446	0.463	0.245	5.7028e-23	Tumor cells 1	HSBP1
5.68521e-27	0.507771	0.76	0.709	1.03545e-22	Tumor cells 1	CHCHD2
6.47883e-27	0.287368	0.972	0.944	1.17999e-22	Tumor cells 1	RPL9
6.78851e-27	0.609995	0.622	0.435	1.23639e-22	Tumor cells 1	RTN4
8.44455e-27	0.599051	0.631	0.469	1.53801e-22	Tumor cells 1	VAMP8
1.15168e-26	0.56452	0.312	0.131	2.09756e-22	Tumor cells 1	ISCA2
1.38635e-26	0.54243	0.319	0.133	2.52496e-22	Tumor cells 1	SLC16A3
2.75872e-26	0.573642	0.367	0.169	5.02446e-22	Tumor cells 1	ATP6V1E1
2.76555e-26	0.575473	0.557	0.354	5.0369e-22	Tumor cells 1	SNRPD3
2.94933e-26	0.616708	0.303	0.122	5.37161e-22	Tumor cells 1	NFIA
4.7886e-26	0.577285	0.349	0.159	8.72147e-22	Tumor cells 1	FKBP3
6.96493e-26	0.602014	0.38	0.186	1.26852e-21	Tumor cells 1	TXN2
8.21839e-26	0.474478	0.253	0.091	1.49682e-21	Tumor cells 1	TOLLIP
8.54409e-26	0.603293	0.531	0.343	1.55614e-21	Tumor cells 1	COX5A
1.41947e-25	0.608945	0.441	0.237	2.58529e-21	Tumor cells 1	SNHG7
1.57625e-25	0.565936	0.463	0.259	2.87083e-21	Tumor cells 1	GDI2
2.17347e-25	0.568549	0.365	0.173	3.95854e-21	Tumor cells 1	CISD3
3.24384e-25	0.55971	0.441	0.245	5.908e-21	Tumor cells 1	NDUFAF8
3.63931e-25	0.560691	0.362	0.173	6.62828e-21	Tumor cells 1	FUNDC2
3.96306e-25	0.518787	0.319	0.135	7.21793e-21	Tumor cells 1	CTSH
7.57868e-25	0.608149	0.607	0.443	1.38031e-20	Tumor cells 1	POLR2L
9.10649e-25	0.524442	0.319	0.142	1.65856e-20	Tumor cells 1	RTCB
1.16354e-24	0.612208	0.463	0.266	2.11915e-20	Tumor cells 1	UQCRFS1
1.32172e-24	0.603235	0.557	0.377	2.40725e-20	Tumor cells 1	ATP5F1C
1.96348e-24	0.284297	0.972	0.959	3.57608e-20	Tumor cells 1	RPL21
3.77865e-24	0.546512	0.382	0.19	6.88206e-20	Tumor cells 1	POLR2I
3.99034e-24	0.610965	0.511	0.324	7.26761e-20	Tumor cells 1	MRPL41
4.68099e-24	0.569381	0.373	0.183	8.52548e-20	Tumor cells 1	HDLBP
4.69941e-24	0.536622	0.391	0.196	8.55903e-20	Tumor cells 1	SNX5
5.52396e-24	0.415646	0.273	0.106	1.00608e-19	Tumor cells 1	GALM
6.00137e-24	0.569394	0.614	0.456	1.09303e-19	Tumor cells 1	EIF4B
1.01616e-23	0.602692	0.559	0.399	1.85074e-19	Tumor cells 1	FAM96B
1.26378e-23	0.320967	0.932	0.912	2.30173e-19	Tumor cells 1	RPL36
1.52152e-23	0.533055	0.349	0.168	2.77115e-19	Tumor cells 1	TMEM256
1.76389e-23	0.42511	0.262	0.103	3.21257e-19	Tumor cells 1	MTCH2
1.78379e-23	0.406166	0.31	0.126	3.24881e-19	Tumor cells 1	NFIB
2.28607e-23	0.545458	0.559	0.378	4.16362e-19	Tumor cells 1	ATP5MF
3.41458e-23	0.461857	0.277	0.113	6.21898e-19	Tumor cells 1	MGAT4B
6.77724e-23	0.50113	0.266	0.108	1.23434e-18	Tumor cells 1	OXA1L
8.21697e-23	0.627992	0.478	0.298	1.49656e-18	Tumor cells 1	NDUFS7
1.61682e-22	0.537745	0.402	0.218	2.94472e-18	Tumor cells 1	MRPS34
1.89439e-22	0.56583	0.587	0.44	3.45025e-18	Tumor cells 1	NDUFB10
2.11737e-22	0.564407	0.367	0.182	3.85636e-18	Tumor cells 1	HPCAL1
2.15152e-22	0.405799	0.321	0.144	3.91856e-18	Tumor cells 1	NDUFA8
2.31633e-22	0.485036	0.306	0.134	4.21873e-18	Tumor cells 1	PDXK
3.14116e-22	0.472422	0.729	0.666	5.72099e-18	Tumor cells 1	EIF3K
3.81675e-22	0.523103	0.5	0.317	6.95144e-18	Tumor cells 1	PGLS
5.89527e-22	0.571941	0.657	0.553	1.07371e-17	Tumor cells 1	SAP18
6.22204e-22	0.514328	0.328	0.155	1.13322e-17	Tumor cells 1	CHCHD5
7.67392e-22	0.262194	0.961	0.937	1.39765e-17	Tumor cells 1	RPL18A
8.23076e-22	0.508095	0.638	0.513	1.49907e-17	Tumor cells 1	NEDD8
1.31093e-21	0.610699	0.445	0.266	2.3876e-17	Tumor cells 1	ROMO1
1.39301e-21	0.455674	0.362	0.184	2.5371e-17	Tumor cells 1	TIMM8B
1.98344e-21	0.540699	0.413	0.229	3.61245e-17	Tumor cells 1	CDK2AP2
2.22091e-21	0.523251	0.415	0.237	4.04494e-17	Tumor cells 1	C1orf43
4.06861e-21	0.505142	0.371	0.196	7.41016e-17	Tumor cells 1	KDELR1
4.73061e-21	0.470557	0.279	0.121	8.61585e-17	Tumor cells 1	COA6
6.21475e-21	0.498664	0.413	0.225	1.13189e-16	Tumor cells 1	ACADVL
6.57288e-21	0.543508	0.561	0.403	1.19712e-16	Tumor cells 1	SEC11A
1.08935e-20	0.486049	0.424	0.244	1.98404e-16	Tumor cells 1	SDHD
1.12117e-20	0.492617	0.467	0.288	2.04199e-16	Tumor cells 1	MDH2
1.50148e-20	0.289539	0.939	0.909	2.73464e-16	Tumor cells 1	RPL24
1.70863e-20	0.516527	0.672	0.541	3.11193e-16	Tumor cells 1	APRT
1.78578e-20	0.488059	0.277	0.12	3.25245e-16	Tumor cells 1	NDUFS1
1.96078e-20	0.541508	0.631	0.491	3.57116e-16	Tumor cells 1	ATP5IF1
2.03708e-20	0.405155	0.293	0.131	3.71013e-16	Tumor cells 1	CNIH1
2.08497e-20	0.575806	0.452	0.277	3.79736e-16	Tumor cells 1	HAGH
2.22764e-20	0.4686	0.498	0.316	4.0572e-16	Tumor cells 1	NDUFA2
2.95595e-20	0.514906	0.609	0.47	5.38368e-16	Tumor cells 1	BRK1
3.0264e-20	0.480611	0.376	0.196	5.51199e-16	Tumor cells 1	SLC2A4RG
3.05372e-20	0.344528	0.262	0.108	5.56174e-16	Tumor cells 1	MRPS18B
3.16252e-20	0.459408	0.354	0.182	5.75989e-16	Tumor cells 1	EPB41L4A-AS1
3.17329e-20	0.457041	0.321	0.155	5.77952e-16	Tumor cells 1	FAM200B
9.37859e-20	0.515844	0.472	0.308	1.70812e-15	Tumor cells 1	ATP5F1A
1.37993e-19	0.521349	0.524	0.358	2.51327e-15	Tumor cells 1	NDUFA11
1.40304e-19	0.531662	0.306	0.146	2.55535e-15	Tumor cells 1	TMEM205
1.48806e-19	0.51623	0.301	0.147	2.71021e-15	Tumor cells 1	RNF5
1.91673e-19	0.579511	0.594	0.468	3.49095e-15	Tumor cells 1	ZFAS1
2.15709e-19	0.5527	0.583	0.432	3.92871e-15	Tumor cells 1	ATP5ME
2.47958e-19	0.36685	0.271	0.117	4.51606e-15	Tumor cells 1	EPN1
2.52016e-19	0.6073	0.507	0.344	4.58997e-15	Tumor cells 1	EIF3L
2.52711e-19	0.450201	0.338	0.171	4.60263e-15	Tumor cells 1	VEGFB
3.52312e-19	0.52647	0.428	0.246	6.41667e-15	Tumor cells 1	PTTG1IP
8.36573e-19	0.409714	0.367	0.194	1.52365e-14	Tumor cells 1	BAG1
9.51868e-19	0.537263	0.428	0.264	1.73364e-14	Tumor cells 1	UQCRC2
1.52871e-18	0.403191	0.397	0.215	2.78424e-14	Tumor cells 1	CARHSP1
2.24848e-18	0.470156	0.566	0.41	4.09515e-14	Tumor cells 1	ERH
2.4491e-18	0.433879	0.354	0.19	4.46055e-14	Tumor cells 1	MRPS7
3.41771e-18	0.420277	0.255	0.112	6.22468e-14	Tumor cells 1	TIMM10
3.43188e-18	0.472819	0.62	0.501	6.25049e-14	Tumor cells 1	DBI
6.2438e-18	0.499087	0.441	0.28	1.13718e-13	Tumor cells 1	NDUFB3
6.83391e-18	0.382489	0.282	0.132	1.24466e-13	Tumor cells 1	GRPEL1
8.57022e-18	0.486679	0.343	0.18	1.56089e-13	Tumor cells 1	CYB5R3
1.04533e-17	0.507066	0.277	0.132	1.90386e-13	Tumor cells 1	BOLA3
1.10593e-17	0.490374	0.323	0.167	2.01422e-13	Tumor cells 1	TNIP1
1.42854e-17	0.459562	0.476	0.307	2.6018e-13	Tumor cells 1	ANAPC11
2.31884e-17	0.476826	0.36	0.201	4.22331e-13	Tumor cells 1	ACP1
9.42296e-17	0.472363	0.36	0.206	1.7162e-12	Tumor cells 1	UGP2
1.12885e-16	0.401095	0.297	0.144	2.05598e-12	Tumor cells 1	ABHD14B
1.87422e-16	0.422587	0.646	0.513	3.41352e-12	Tumor cells 1	EIF3E
2.15643e-16	0.341176	0.31	0.16	3.92751e-12	Tumor cells 1	NDUFV1
2.71989e-16	0.36966	0.721	0.657	4.95373e-12	Tumor cells 1	OST4
3.53684e-16	0.398169	0.317	0.162	6.44165e-12	Tumor cells 1	SMIM19
3.73461e-16	0.271714	0.86	0.863	6.80185e-12	Tumor cells 1	RPL38
4.80441e-16	0.484038	0.386	0.239	8.75027e-12	Tumor cells 1	LSM4
5.37725e-16	0.37966	0.336	0.178	9.79359e-12	Tumor cells 1	CHMP3
5.42128e-16	0.443533	0.303	0.157	9.87378e-12	Tumor cells 1	CLPTM1L
6.91034e-16	0.256736	0.251	0.11	1.25858e-11	Tumor cells 1	FAM213A
1.12037e-15	0.443147	0.365	0.214	2.04053e-11	Tumor cells 1	COX20
1.50042e-15	0.414695	0.286	0.144	2.73272e-11	Tumor cells 1	ECHDC1
1.74101e-15	0.273739	0.952	0.948	3.17091e-11	Tumor cells 1	EIF1
1.76308e-15	0.469298	0.312	0.167	3.21109e-11	Tumor cells 1	ARFGAP3
2.14392e-15	0.433774	0.48	0.338	3.90472e-11	Tumor cells 1	UBE2L3
3.9026e-15	0.371894	0.266	0.13	7.1078e-11	Tumor cells 1	SLC25A4
4.04048e-15	0.453951	0.365	0.214	7.35893e-11	Tumor cells 1	IMP3
4.17699e-15	0.439597	0.386	0.235	7.60755e-11	Tumor cells 1	CHMP5
4.35718e-15	0.480742	0.424	0.271	7.93572e-11	Tumor cells 1	RSL1D1
4.44704e-15	0.59409	0.463	0.329	8.09939e-11	Tumor cells 1	P4HB
5.26855e-15	0.48455	0.528	0.406	9.5956e-11	Tumor cells 1	RBX1
5.3869e-15	0.435786	0.659	0.589	9.81116e-11	Tumor cells 1	ELOB
7.23749e-15	0.363116	0.421	0.265	1.31816e-10	Tumor cells 1	CAPZA2
8.08247e-15	0.423757	0.485	0.329	1.47206e-10	Tumor cells 1	YWHAE
9.4687e-15	0.440474	0.352	0.209	1.72454e-10	Tumor cells 1	PPCS
1.03517e-14	0.430704	0.461	0.317	1.88536e-10	Tumor cells 1	VDAC2
1.06281e-14	0.451918	0.491	0.354	1.93569e-10	Tumor cells 1	NDUFV2
1.28048e-14	0.403791	0.286	0.147	2.33214e-10	Tumor cells 1	NFIC
1.45068e-14	0.376287	0.321	0.183	2.64212e-10	Tumor cells 1	EIF2A
1.56248e-14	0.450264	0.356	0.212	2.84575e-10	Tumor cells 1	EIF1AY
1.98662e-14	0.386197	0.338	0.191	3.61824e-10	Tumor cells 1	PSMC1
3.13897e-14	0.262632	0.4	0.226	5.71701e-10	Tumor cells 1	TSC22D1
3.57291e-14	0.464545	0.566	0.446	6.50733e-10	Tumor cells 1	COX7B
6.38975e-14	0.435516	0.332	0.191	1.16376e-09	Tumor cells 1	COPZ1
9.10828e-14	0.411973	0.284	0.15	1.65889e-09	Tumor cells 1	SKAP2
1.08249e-13	0.422643	0.282	0.151	1.97154e-09	Tumor cells 1	MRPL22
1.27454e-13	0.518926	0.456	0.329	2.32132e-09	Tumor cells 1	NDUFA3
1.42985e-13	0.471421	0.552	0.431	2.60419e-09	Tumor cells 1	COPE
1.54674e-13	0.370359	0.36	0.216	2.81708e-09	Tumor cells 1	PDLIM2
1.71134e-13	0.356385	0.301	0.163	3.11686e-09	Tumor cells 1	ALDH9A1
1.8476e-13	0.475092	0.513	0.395	3.36503e-09	Tumor cells 1	NDUFS6
2.13198e-13	0.462222	0.568	0.455	3.88298e-09	Tumor cells 1	C19orf53
2.59958e-13	0.461706	0.489	0.364	4.73461e-09	Tumor cells 1	SF3B6
2.86886e-13	0.35026	0.258	0.133	5.22506e-09	Tumor cells 1	ERCC1
3.45492e-13	0.397575	0.544	0.419	6.29245e-09	Tumor cells 1	MGST3
4.24978e-13	0.480337	0.43	0.299	7.74012e-09	Tumor cells 1	ATP5PB
7.25421e-13	0.501444	0.314	0.186	1.32121e-08	Tumor cells 1	VKORC1
7.47695e-13	0.370833	0.526	0.391	1.36178e-08	Tumor cells 1	SNX3
7.59835e-13	0.385244	0.255	0.136	1.38389e-08	Tumor cells 1	PMPCB
9.17397e-13	0.370104	0.568	0.452	1.67085e-08	Tumor cells 1	CSTB
1.19939e-12	0.365879	0.264	0.138	2.18445e-08	Tumor cells 1	MRPL28
1.2063e-12	0.393366	0.389	0.254	2.19704e-08	Tumor cells 1	ALKBH7
1.25944e-12	0.415732	0.299	0.171	2.29382e-08	Tumor cells 1	PLEKHB2
1.4289e-12	0.377467	0.269	0.15	2.60246e-08	Tumor cells 1	CLPP
1.53816e-12	0.325739	0.459	0.308	2.80145e-08	Tumor cells 1	MRPL54
1.5883e-12	0.428872	0.424	0.291	2.89277e-08	Tumor cells 1	RAB5C
1.86269e-12	0.312696	0.303	0.169	3.39251e-08	Tumor cells 1	NAA20
2.42295e-12	0.406202	0.587	0.491	4.41293e-08	Tumor cells 1	CIB1
2.44926e-12	0.40256	0.306	0.178	4.46084e-08	Tumor cells 1	TRAPPC6A
2.47538e-12	0.318729	0.734	0.675	4.50841e-08	Tumor cells 1	TOMM7
3.20165e-12	0.421757	0.347	0.22	5.83116e-08	Tumor cells 1	SPAG9
3.93945e-12	0.385717	0.336	0.204	7.17493e-08	Tumor cells 1	PPA1
4.13246e-12	0.372297	0.286	0.162	7.52644e-08	Tumor cells 1	ASNA1
4.91979e-12	0.421613	0.432	0.299	8.96041e-08	Tumor cells 1	SMIM26
6.71388e-12	0.385822	0.319	0.189	1.2228e-07	Tumor cells 1	C1D
6.94689e-12	0.370613	0.284	0.16	1.26524e-07	Tumor cells 1	AHSA1
8.94778e-12	0.398963	0.365	0.234	1.62966e-07	Tumor cells 1	RHEB
2.03203e-11	0.460142	0.522	0.418	3.70094e-07	Tumor cells 1	ATP5MD
2.95422e-11	0.389022	0.631	0.58	5.38053e-07	Tumor cells 1	ATP6V1G1
2.96705e-11	0.424705	0.312	0.191	5.40389e-07	Tumor cells 1	DPY30
3.27933e-11	0.43785	0.434	0.306	5.97264e-07	Tumor cells 1	CCT3
3.64984e-11	0.37735	0.314	0.191	6.64745e-07	Tumor cells 1	NDUFS4
4.34271e-11	0.387538	0.469	0.351	7.90938e-07	Tumor cells 1	EIF3D
4.80585e-11	0.341822	0.286	0.166	8.7529e-07	Tumor cells 1	MORF4L2
4.96084e-11	0.320788	0.452	0.321	9.03518e-07	Tumor cells 1	LAMTOR1
5.04296e-11	0.424117	0.452	0.337	9.18475e-07	Tumor cells 1	SRP9
6.29548e-11	0.381282	0.356	0.23	1.1466e-06	Tumor cells 1	TOMM22
7.21208e-11	0.279843	0.253	0.139	1.31354e-06	Tumor cells 1	RNF187
7.43727e-11	0.33384	0.288	0.17	1.35455e-06	Tumor cells 1	SDHB
7.9605e-11	0.401754	0.349	0.226	1.44985e-06	Tumor cells 1	PSMC4
8.92318e-11	0.283738	0.266	0.15	1.62518e-06	Tumor cells 1	COMMD4
9.51911e-11	0.354693	0.5	0.396	1.73372e-06	Tumor cells 1	RTRAF
9.91677e-11	0.312572	0.286	0.167	1.80614e-06	Tumor cells 1	ACTR10
1.24683e-10	0.296823	0.266	0.15	2.27085e-06	Tumor cells 1	HDDC2
2.65496e-10	0.374837	0.262	0.151	4.83549e-06	Tumor cells 1	GLOD4
2.86999e-10	0.350448	0.251	0.142	5.22712e-06	Tumor cells 1	TUBA1C
2.89719e-10	0.370028	0.295	0.178	5.27665e-06	Tumor cells 1	MTIF3
3.14005e-10	0.251567	0.251	0.136	5.71897e-06	Tumor cells 1	MRPL17
4.40981e-10	0.384368	0.434	0.315	8.03159e-06	Tumor cells 1	TMEM230
5.8566e-10	0.402339	0.62	0.576	1.06666e-05	Tumor cells 1	EIF4A2
6.10002e-10	0.398368	0.507	0.405	1.111e-05	Tumor cells 1	SSBP1
6.58424e-10	0.278271	0.266	0.153	1.19919e-05	Tumor cells 1	TMEM238
6.60678e-10	0.332085	0.454	0.332	1.20329e-05	Tumor cells 1	PSMC5
7.44109e-10	0.31764	0.286	0.171	1.35525e-05	Tumor cells 1	MRPS15
1.05354e-09	0.397858	0.509	0.408	1.91881e-05	Tumor cells 1	SEM1
1.1853e-09	0.34132	0.253	0.145	2.1588e-05	Tumor cells 1	EIF2S1
1.23673e-09	0.359618	0.57	0.486	2.25245e-05	Tumor cells 1	TOMM20
1.24267e-09	0.43765	0.45	0.337	2.26328e-05	Tumor cells 1	ATF4
1.40076e-09	0.356752	0.406	0.286	2.5512e-05	Tumor cells 1	CSNK2B
1.54337e-09	0.342041	0.323	0.204	2.81094e-05	Tumor cells 1	LAMTOR2
1.66424e-09	0.318032	0.664	0.629	3.03108e-05	Tumor cells 1	SKP1
1.74474e-09	0.277887	0.59	0.487	3.17769e-05	Tumor cells 1	POMP
1.79827e-09	0.278482	0.64	0.551	3.27519e-05	Tumor cells 1	RAC1
2.00051e-09	0.270016	0.319	0.204	3.64353e-05	Tumor cells 1	DECR1
2.18397e-09	0.412015	0.367	0.255	3.97767e-05	Tumor cells 1	RANBP1
2.98844e-09	0.434805	0.45	0.351	5.44285e-05	Tumor cells 1	MRPL20
3.16747e-09	0.272362	0.764	0.761	5.76892e-05	Tumor cells 1	HSP90AB1
3.24707e-09	0.4227	0.384	0.272	5.91389e-05	Tumor cells 1	CRIP1
3.41308e-09	0.371954	0.258	0.155	6.21625e-05	Tumor cells 1	EIF3B
3.62622e-09	0.400292	0.528	0.441	6.60444e-05	Tumor cells 1	DYNLT1
4.5147e-09	0.324961	0.303	0.193	8.22261e-05	Tumor cells 1	SUGT1
4.79808e-09	0.333803	0.286	0.178	8.73875e-05	Tumor cells 1	HDGF
4.88217e-09	0.28567	0.437	0.318	8.89189e-05	Tumor cells 1	CTSB
5.2719e-09	0.3985	0.408	0.298	9.60172e-05	Tumor cells 1	GLS
5.70539e-09	0.364377	0.33	0.217	0.000103912	Tumor cells 1	BIN1
5.76629e-09	0.380885	0.404	0.297	0.000105021	Tumor cells 1	CMPK1
6.32372e-09	0.323746	0.524	0.43	0.000115174	Tumor cells 1	HIGD2A
6.57064e-09	0.299133	0.279	0.173	0.000119671	Tumor cells 1	UBE2R2
7.22795e-09	0.311836	0.312	0.205	0.000131643	Tumor cells 1	CYC1
7.65224e-09	0.437286	0.415	0.322	0.00013937	Tumor cells 1	ZNHIT1
7.79371e-09	0.329656	0.419	0.304	0.000141947	Tumor cells 1	YWHAH
1.16189e-08	0.30754	0.266	0.164	0.000211615	Tumor cells 1	DGCR6L
1.78326e-08	0.325912	0.43	0.318	0.000324786	Tumor cells 1	TMEM219
2.17892e-08	0.2944	0.325	0.22	0.000396846	Tumor cells 1	SOD2
2.27029e-08	0.316669	0.255	0.154	0.000413488	Tumor cells 1	ERGIC3
2.69631e-08	0.352709	0.345	0.242	0.00049108	Tumor cells 1	ODC1
3.17645e-08	0.292383	0.644	0.599	0.000578527	Tumor cells 1	SLC25A3
3.51172e-08	0.329823	0.295	0.192	0.00063959	Tumor cells 1	STAU1
3.9358e-08	0.318389	0.48	0.382	0.000716827	Tumor cells 1	AURKAIP1
4.45932e-08	0.387113	0.432	0.342	0.000812175	Tumor cells 1	GHITM
7.18794e-08	0.2846	0.275	0.176	0.00130914	Tumor cells 1	ISCA1
7.42439e-08	0.32195	0.461	0.378	0.0013522	Tumor cells 1	SUMO1
9.62194e-08	0.277929	0.275	0.178	0.00175244	Tumor cells 1	COMMD1
1.0206e-07	0.275565	0.251	0.157	0.00185881	Tumor cells 1	REXO2
1.21993e-07	0.304972	0.319	0.217	0.00222186	Tumor cells 1	MRPS6
1.27514e-07	0.316113	0.384	0.289	0.0023224	Tumor cells 1	PHB2
1.36943e-07	0.327326	0.277	0.183	0.00249415	Tumor cells 1	NHP2
2.07584e-07	0.367584	0.358	0.267	0.00378073	Tumor cells 1	CCT6A
2.11477e-07	0.459272	0.33	0.232	0.00385163	Tumor cells 1	MAPK1
2.29149e-07	0.369727	0.395	0.307	0.00417349	Tumor cells 1	MRPS21
2.49496e-07	0.311374	0.328	0.227	0.00454407	Tumor cells 1	PPP1R7
2.67806e-07	0.39492	0.386	0.295	0.00487755	Tumor cells 1	CCT8
3.72652e-07	0.32272	0.306	0.206	0.00678711	Tumor cells 1	CAMTA1
3.8813e-07	0.309207	0.26	0.167	0.00706901	Tumor cells 1	PPP2R1A
3.90022e-07	0.370042	0.491	0.423	0.00710347	Tumor cells 1	ATP5F1B
3.90453e-07	0.367492	0.483	0.396	0.00711132	Tumor cells 1	NDUFB8
4.74004e-07	0.35132	0.408	0.304	0.00863303	Tumor cells 1	HADHA
4.98513e-07	0.347911	0.352	0.262	0.00907942	Tumor cells 1	NDUFS8
5.73356e-07	0.302589	0.297	0.205	0.0104425	Tumor cells 1	LSM5
5.8252e-07	0.310211	0.341	0.25	0.0106094	Tumor cells 1	NDUFB5
7.15565e-07	0.286976	0.334	0.239	0.0130326	Tumor cells 1	HEBP2
8.18503e-07	0.303231	0.439	0.354	0.0149074	Tumor cells 1	COPS9
1.08116e-06	0.31106	0.517	0.453	0.0196912	Tumor cells 1	EIF3H
1.11205e-06	0.334516	0.424	0.334	0.0202537	Tumor cells 1	XRCC6
1.26638e-06	0.267375	0.306	0.212	0.0230645	Tumor cells 1	STMP1
1.91808e-06	0.293593	0.646	0.622	0.034934	Tumor cells 1	COX6C
1.99419e-06	0.294548	0.541	0.49	0.0363202	Tumor cells 1	UQCR11
2.44699e-06	0.334941	0.332	0.241	0.044567	Tumor cells 1	SNF8
2.70934e-06	0.259963	0.279	0.186	0.0493453	Tumor cells 1	C19orf24
3.18643e-06	0.280613	0.456	0.372	0.0580344	Tumor cells 1	NOP10
4.49452e-06	0.352095	0.358	0.274	0.0818586	Tumor cells 1	POLR2J
5.10042e-06	0.303341	0.255	0.174	0.0928939	Tumor cells 1	TRADD
5.28214e-06	0.272682	0.253	0.17	0.0962037	Tumor cells 1	POLR2C
5.50846e-06	0.295966	0.299	0.211	0.100326	Tumor cells 1	NT5C
6.73093e-06	0.339749	0.325	0.237	0.12259	Tumor cells 1	NDUFA13
7.1412e-06	0.261158	0.299	0.215	0.130063	Tumor cells 1	IAH1
7.92832e-06	0.324009	0.255	0.175	0.144399	Tumor cells 1	FAM120A
9.81608e-06	0.318538	0.507	0.444	0.17878	Tumor cells 1	NDUFA1
1.09155e-05	0.312469	0.306	0.222	0.198804	Tumor cells 1	POLE4
1.38675e-05	0.285049	0.415	0.343	0.252569	Tumor cells 1	STUB1
1.4275e-05	0.326087	0.306	0.226	0.25999	Tumor cells 1	ILF2
1.69992e-05	0.289536	0.498	0.44	0.309606	Tumor cells 1	PSMD8
1.85976e-05	0.309073	0.448	0.377	0.338717	Tumor cells 1	CALM3
2.02334e-05	0.271265	0.26	0.184	0.368511	Tumor cells 1	PSMD11
2.29688e-05	0.293409	0.5	0.423	0.418331	Tumor cells 1	EZR
2.6793e-05	0.282733	0.378	0.299	0.487981	Tumor cells 1	SSR3
2.68412e-05	0.298617	0.371	0.292	0.488858	Tumor cells 1	NDUFAF3
2.77941e-05	0.324248	0.456	0.379	0.506213	Tumor cells 1	ENY2
3.69701e-05	0.368537	0.428	0.363	0.673337	Tumor cells 1	RNASET2
3.95078e-05	0.259881	0.378	0.299	0.719556	Tumor cells 1	DCTN3
4.265e-05	0.269341	0.371	0.292	0.776785	Tumor cells 1	VPS29
6.4339e-05	0.285649	0.31	0.233	1	Tumor cells 1	C6orf48
7.69636e-05	0.327282	0.504	0.46	1	Tumor cells 1	SNU13
8.06013e-05	0.254465	0.336	0.258	1	Tumor cells 1	ANP32A
8.36148e-05	0.352967	0.31	0.237	1	Tumor cells 1	AMD1
0.000110555	0.254345	0.255	0.181	1	Tumor cells 1	FAM173A
0.000113562	0.269247	0.537	0.49	1	Tumor cells 1	NUCKS1
0.000117832	0.299772	0.36	0.298	1	Tumor cells 1	OSTC
0.000136179	0.290612	0.539	0.506	1	Tumor cells 1	DAD1
0.000147087	0.349601	0.504	0.466	1	Tumor cells 1	PCBP2
0.000165504	0.26041	0.434	0.372	1	Tumor cells 1	GTF3A
0.000206596	0.264176	0.308	0.239	1	Tumor cells 1	MLEC
0.000222164	0.310457	0.328	0.254	1	Tumor cells 1	SSNA1
0.000259608	0.27565	0.443	0.392	1	Tumor cells 1	NDUFB4
0.000520074	0.266858	0.358	0.298	1	Tumor cells 1	TSTD1
0.000575161	0.31313	0.371	0.317	1	Tumor cells 1	SNRPB2
0.000645059	0.365521	0.384	0.322	1	Tumor cells 1	CANX
0.000837775	0.263172	0.395	0.351	1	Tumor cells 1	POLR1D
0.00204202	0.250287	0.568	0.561	1	Tumor cells 1	HNRNPK
0.00261288	0.303157	0.397	0.358	1	Tumor cells 1	MRPL51
0	3.27812	0.903	0.085	0	NK cells	GNLY
0	2.70431	0.89	0.049	0	NK cells	GZMB
0	2.40192	0.874	0.029	0	NK cells	FGFBP2
0	2.01322	0.847	0.045	0	NK cells	KLRD1
0	1.83405	0.865	0.119	0	NK cells	PRF1
0	1.64157	0.739	0.056	0	NK cells	CTSW
0	1.59584	0.619	0.014	0	NK cells	KLRF1
0	1.54641	0.541	0.017	0	NK cells	TRDC
1.97853e-300	1.90213	0.856	0.126	3.60349e-296	NK cells	GZMH
6.91263e-299	2.36885	0.993	0.303	1.259e-294	NK cells	NKG7
4.52568e-241	1.35679	0.678	0.077	8.24262e-237	NK cells	FCGR3A
6.58782e-234	1.29287	0.714	0.105	1.19984e-229	NK cells	PLAC8
8.41509e-233	1.39042	0.529	0.04	1.53264e-228	NK cells	SPON2
9.31154e-213	0.89221	0.426	0.021	1.69591e-208	NK cells	S1PR5
1.10116e-211	0.985333	0.414	0.019	2.00555e-207	NK cells	CX3CR1
1.53321e-205	1.0223	0.304	0.002	2.79244e-201	NK cells	KLRC2
6.20288e-203	1.3839	0.968	0.315	1.12973e-198	NK cells	CST7
2.60036e-186	1.28466	0.748	0.159	4.73604e-182	NK cells	HOPX
1.77516e-178	1.3582	0.827	0.248	3.23311e-174	NK cells	CD247
5.22965e-177	1.07351	0.741	0.154	9.52476e-173	NK cells	PLEK
8.28985e-176	1.29355	0.865	0.293	1.50983e-171	NK cells	EFHD2
4.80278e-154	1.06621	0.867	0.281	8.74731e-150	NK cells	GZMM
4.01899e-152	1.07003	0.955	0.317	7.31979e-148	NK cells	GZMA
2.12669e-148	1.13147	0.761	0.193	3.87333e-144	NK cells	KLRB1
2.49368e-145	1.29066	0.782	0.247	4.54173e-141	NK cells	METRNL
3.82549e-143	0.981001	0.759	0.199	6.96737e-139	NK cells	ZEB2
1.62553e-141	1.10753	0.962	0.395	2.96057e-137	NK cells	CCL5
9.88354e-130	0.979015	0.905	0.378	1.80009e-125	NK cells	ITGB2
1.32112e-129	0.944956	0.448	0.066	2.40616e-125	NK cells	CLIC3
5.58151e-129	0.893048	0.586	0.123	1.01656e-124	NK cells	MATK
1.53647e-127	0.995688	0.944	0.425	2.79837e-123	NK cells	HCST
7.87556e-127	0.68626	0.315	0.025	1.43438e-122	NK cells	FCRL6
9.50695e-122	0.992828	0.944	0.447	1.7315e-117	NK cells	ARL4C
1.42977e-116	1.08078	0.628	0.169	2.60404e-112	NK cells	CD7
1.12224e-114	0.65197	0.993	0.851	2.04393e-110	NK cells	HLA-C
2.64186e-111	0.8475	0.98	0.697	4.81162e-107	NK cells	CYBA
6.0604e-110	0.919707	0.714	0.22	1.10378e-105	NK cells	TYROBP
3.58651e-108	0.880797	0.93	0.428	6.5321e-104	NK cells	CCL4
2.30461e-104	0.628767	0.329	0.04	4.19739e-100	NK cells	SYNGR1
1.89378e-102	0.486548	1	0.989	3.44914e-98	NK cells	B2M
1.41131e-101	0.834	0.687	0.232	2.57042e-97	NK cells	BIN2
1.65217e-100	0.695812	0.405	0.069	3.0091e-96	NK cells	ADGRG1
1.0982e-99	0.802968	0.628	0.186	2.00015e-95	NK cells	MYO1F
1.12034e-99	0.613482	0.347	0.048	2.04047e-95	NK cells	C1orf21
5.01833e-98	0.645277	0.347	0.05	9.13988e-94	NK cells	NCR3
5.95008e-93	0.828553	0.827	0.396	1.08369e-88	NK cells	ABHD17A
8.15532e-93	0.812899	0.541	0.144	1.48533e-88	NK cells	SYTL3
3.04827e-92	0.686357	0.385	0.069	5.55181e-88	NK cells	LINC01871
1.15006e-91	0.633332	0.34	0.052	2.0946e-87	NK cells	CEP78
5.66675e-91	0.730378	0.975	0.75	1.03209e-86	NK cells	PFN1
1.22696e-87	0.754337	0.685	0.247	2.23467e-83	NK cells	C12orf75
3.34325e-86	0.845341	0.883	0.483	6.08905e-82	NK cells	IRF1
6.08873e-85	0.75545	0.849	0.454	1.10894e-80	NK cells	RAP1B
4.23681e-83	0.721148	0.525	0.146	7.7165e-79	NK cells	PYHIN1
2.1768e-82	0.76848	0.615	0.208	3.9646e-78	NK cells	RUNX3
1.10008e-81	0.679299	0.703	0.237	2.00358e-77	NK cells	TRBC1
9.36965e-80	0.713547	0.619	0.211	1.7065e-75	NK cells	AKNA
1.48791e-79	0.625916	0.354	0.068	2.70993e-75	NK cells	GTF3C1
2.38961e-79	0.709453	0.971	0.62	4.3522e-75	NK cells	S100A4
2.61337e-75	0.75387	0.867	0.5	4.75973e-71	NK cells	IFITM2
5.89783e-75	0.606287	0.428	0.106	1.07417e-70	NK cells	TPST2
1.62206e-74	0.61039	0.466	0.121	2.95426e-70	NK cells	SAMD3
2.65933e-74	0.705038	0.827	0.409	4.84343e-70	NK cells	RARRES3
3.36601e-72	0.55597	0.318	0.059	6.13052e-68	NK cells	CD300A
1.71809e-71	0.620052	0.948	0.72	3.12916e-67	NK cells	ARPC2
1.74787e-71	0.543491	0.255	0.036	3.1834e-67	NK cells	HSH2D
2.99103e-71	0.718229	0.698	0.302	5.44757e-67	NK cells	LSP1
1.13727e-70	0.510244	0.288	0.047	2.07132e-66	NK cells	ADRB2
2.63122e-70	0.674749	0.493	0.152	4.79223e-66	NK cells	APMAP
4.53888e-70	0.696503	0.741	0.342	8.26667e-66	NK cells	LITAF
5.05737e-69	0.712926	0.505	0.164	9.21098e-65	NK cells	DOK2
2.99608e-67	0.676014	0.288	0.05	5.45675e-63	NK cells	XCL2
3.05352e-67	0.55367	0.369	0.084	5.56137e-63	NK cells	TTC38
4.10873e-66	0.570347	0.27	0.046	7.48322e-62	NK cells	GK5
6.18891e-66	0.633134	0.662	0.284	1.12719e-61	NK cells	FAM49B
1.16476e-65	0.664312	0.788	0.398	2.12139e-61	NK cells	RAC2
3.45379e-64	0.538295	0.966	0.798	6.29039e-60	NK cells	MYL12A
1.2495e-63	0.531157	0.971	0.769	2.27572e-59	NK cells	CFL1
1.38599e-63	0.632935	0.5	0.166	2.5243e-59	NK cells	GNG2
4.90745e-63	0.59586	0.955	0.706	8.93793e-59	NK cells	SH3BGRL3
9.14913e-62	0.670568	0.712	0.347	1.66633e-57	NK cells	TGFB1
9.25217e-62	0.624801	0.716	0.345	1.6851e-57	NK cells	FLNA
1.46991e-61	0.604759	0.714	0.33	2.67715e-57	NK cells	CD53
2.95086e-61	0.648486	0.784	0.41	5.37439e-57	NK cells	PPP2R5C
7.26512e-61	0.523957	0.694	0.287	1.3232e-56	NK cells	APOBEC3G
1.20855e-60	0.685894	0.845	0.474	2.20113e-56	NK cells	DUSP2
1.60082e-60	0.514094	0.279	0.053	2.91558e-56	NK cells	AOAH
3.38767e-60	0.438985	1	0.881	6.16996e-56	NK cells	HLA-B
6.25631e-60	0.531131	0.946	0.538	1.13946e-55	NK cells	PTPRC
3.56136e-59	0.415216	1	0.973	6.4863e-55	NK cells	MT-CO1
5.80163e-59	0.502788	0.273	0.052	1.05665e-54	NK cells	RAB37
2.35465e-58	0.607534	0.464	0.152	4.28852e-54	NK cells	PTPN4
8.43029e-58	0.627688	0.444	0.141	1.53541e-53	NK cells	ITGAL
6.02917e-57	0.532498	0.872	0.527	1.09809e-52	NK cells	HLA-F
1.38996e-56	0.668911	0.725	0.366	2.53154e-52	NK cells	DDIT4
1.07061e-55	0.41035	0.998	0.883	1.94991e-51	NK cells	HLA-A
7.7361e-55	0.570145	0.505	0.184	1.40898e-50	NK cells	CHST12
8.33289e-55	0.53648	0.428	0.135	1.51767e-50	NK cells	PTPN22
9.11483e-55	0.473882	0.306	0.071	1.66008e-50	NK cells	LLGL2
2.13539e-54	0.56671	0.869	0.506	3.88918e-50	NK cells	EMP3
3.08774e-54	0.573053	0.529	0.198	5.6237e-50	NK cells	LYAR
3.26415e-54	0.622042	0.444	0.152	5.945e-50	NK cells	SPN
7.97253e-54	0.538069	0.779	0.399	1.45204e-49	NK cells	LCP1
2.2845e-52	0.629744	0.486	0.174	4.16075e-48	NK cells	KLRG1
2.92836e-52	0.516555	0.518	0.192	5.33343e-48	NK cells	GPR65
3.31771e-52	0.540392	0.865	0.467	6.04255e-48	NK cells	CORO1A
5.72872e-52	0.576266	0.414	0.134	1.04337e-47	NK cells	SH2D2A
1.31318e-51	0.604261	0.556	0.229	2.3917e-47	NK cells	ALOX5AP
2.13699e-51	0.626048	0.543	0.231	3.8921e-47	NK cells	CDC42SE1
5.21429e-51	0.500256	0.757	0.382	9.49678e-47	NK cells	ID2
9.27914e-51	0.56802	0.653	0.301	1.69001e-46	NK cells	IL2RG
2.02788e-50	0.552779	0.498	0.19	3.69338e-46	NK cells	ADGRE5
2.26722e-50	0.621041	0.552	0.24	4.1293e-46	NK cells	KLF3
3.14063e-50	0.526657	0.347	0.1	5.72003e-46	NK cells	ZAP70
3.81243e-50	0.505391	0.324	0.084	6.94357e-46	NK cells	MYBL1
3.01005e-49	0.52066	0.581	0.251	5.4822e-45	NK cells	SUN2
1.20209e-48	0.519002	0.565	0.242	2.18937e-44	NK cells	TBC1D10C
1.33041e-48	0.455355	0.286	0.071	2.42308e-44	NK cells	ADAM8
1.72003e-48	0.522663	0.637	0.29	3.13269e-44	NK cells	LCK
3.13144e-48	0.554645	0.646	0.324	5.7033e-44	NK cells	PAXX
8.39225e-48	0.566072	0.563	0.243	1.52848e-43	NK cells	SKAP1
1.7666e-47	0.603715	0.403	0.139	3.2175e-43	NK cells	AC004687.1
9.41363e-47	0.514191	0.586	0.257	1.7145e-42	NK cells	TRAF3IP3
1.28329e-46	0.577317	0.617	0.293	2.33726e-42	NK cells	FMNL1
1.90004e-45	0.47642	0.55	0.229	3.46055e-41	NK cells	RIPOR2
5.2179e-45	0.480685	0.849	0.455	9.50337e-41	NK cells	CD48
1.02734e-44	0.561535	0.536	0.231	1.87109e-40	NK cells	PTPN7
1.06958e-44	0.473325	0.333	0.1	1.94803e-40	NK cells	SELPLG
2.61397e-44	0.441481	0.293	0.079	4.76083e-40	NK cells	SASH3
4.99427e-44	0.50905	0.827	0.486	9.09607e-40	NK cells	TSC22D3
6.50053e-44	0.326331	1	0.977	1.18394e-39	NK cells	MT-CO2
8.15919e-44	0.557619	0.518	0.214	1.48603e-39	NK cells	SLA
2.17787e-43	0.575675	0.347	0.112	3.96655e-39	NK cells	IL2RB
7.5472e-43	0.480953	0.863	0.549	1.37457e-38	NK cells	AES
9.49473e-43	0.524306	0.574	0.269	1.72928e-38	NK cells	MBP
1.70436e-42	0.507342	0.408	0.147	3.10416e-38	NK cells	MYO1G
1.71916e-42	0.531042	0.387	0.137	3.13111e-38	NK cells	GNPTAB
1.69692e-41	0.277607	1	0.983	3.0906e-37	NK cells	TMSB4X
6.70528e-41	0.413975	0.86	0.583	1.22123e-36	NK cells	2021-09-07
2.08343e-40	0.483666	0.338	0.107	3.79455e-36	NK cells	LINC00861
3.671e-40	0.299183	0.971	0.67	6.686e-36	NK cells	SRGN
4.52787e-40	0.433454	0.347	0.114	8.24661e-36	NK cells	STAT4
1.03257e-39	0.505067	0.417	0.163	1.88062e-35	NK cells	RAB29
1.79919e-39	0.423168	0.354	0.118	3.27687e-35	NK cells	ABI3
2.50873e-39	0.484141	0.367	0.133	4.56914e-35	NK cells	SYTL1
4.61482e-39	0.492387	0.559	0.272	8.40498e-35	NK cells	CD47
6.961e-39	0.51112	0.486	0.207	1.26781e-34	NK cells	CEMIP2
9.2595e-39	0.521866	0.45	0.198	1.68643e-34	NK cells	CCND3
1.88433e-38	0.478177	0.721	0.407	3.43193e-34	NK cells	EVL
4.53355e-38	0.486725	0.667	0.369	8.25696e-34	NK cells	CLEC2B
4.61367e-38	0.501607	0.552	0.272	8.40288e-34	NK cells	BTN3A2
8.43213e-38	0.461046	0.595	0.297	1.53574e-33	NK cells	RORA
6.57762e-37	0.415609	0.806	0.501	1.19798e-32	NK cells	CD99
1.83713e-36	0.450401	0.261	0.073	3.34596e-32	NK cells	TRG-AS1
4.21847e-36	0.395746	0.986	0.818	7.6831e-32	NK cells	BTG1
4.2351e-36	0.484008	0.41	0.166	7.71339e-32	NK cells	S1PR4
7.60647e-36	0.441735	0.734	0.446	1.38537e-31	NK cells	VAMP2
1.29845e-35	0.452245	0.428	0.176	2.36488e-31	NK cells	ARHGAP30
1.56889e-35	0.41855	0.705	0.381	2.85742e-31	NK cells	LIMD2
1.97033e-35	0.455354	0.378	0.146	3.58856e-31	NK cells	IFITM1
2.17186e-35	0.444089	0.466	0.208	3.95561e-31	NK cells	DIAPH1
2.51858e-35	0.409773	0.779	0.469	4.58708e-31	NK cells	PSMB9
7.65226e-35	0.418431	0.685	0.376	1.39371e-30	NK cells	REL
9.31944e-35	0.569276	0.329	0.112	1.69735e-30	NK cells	TRGC2
9.39778e-35	0.368249	0.311	0.104	1.71162e-30	NK cells	AGTRAP
2.67904e-34	0.421667	0.329	0.118	4.87934e-30	NK cells	TFDP2
3.0378e-34	0.434034	0.514	0.24	5.53274e-30	NK cells	CELF2
3.25802e-34	0.374076	0.261	0.079	5.93384e-30	NK cells	RASA3
6.28285e-34	0.424215	0.372	0.143	1.1443e-29	NK cells	CCDC88C
7.39011e-34	0.392381	0.297	0.098	1.34596e-29	NK cells	LPCAT1
7.87607e-34	0.357049	0.291	0.093	1.43447e-29	NK cells	TGFBR3
9.81233e-34	0.315976	1	0.941	1.78712e-29	NK cells	RPS3
4.83548e-33	0.378767	0.394	0.161	8.80685e-29	NK cells	SIRT7
5.16576e-33	0.413542	0.331	0.12	9.40839e-29	NK cells	DENND2D
5.8914e-33	0.411918	0.66	0.394	1.073e-28	NK cells	PPP1CA
6.44187e-33	0.401884	0.52	0.25	1.17326e-28	NK cells	UCP2
9.90121e-33	0.446779	0.523	0.263	1.80331e-28	NK cells	ATM
1.98381e-32	0.299838	1	0.961	3.61312e-28	NK cells	ACTB
2.82416e-32	0.419491	0.441	0.195	5.14364e-28	NK cells	GLIPR1
2.83392e-32	0.435954	0.466	0.218	5.16142e-28	NK cells	TNFRSF1B
5.71053e-32	0.40007	0.82	0.525	1.04006e-27	NK cells	RSRP1
7.78093e-32	0.390325	0.527	0.266	1.41714e-27	NK cells	DHRS7
8.46676e-32	0.402937	0.624	0.324	1.54205e-27	NK cells	CYTIP
1.35835e-31	0.405015	0.306	0.11	2.47397e-27	NK cells	RASSF1
3.3442e-31	0.414265	0.351	0.141	6.0908e-27	NK cells	GLIPR2
3.5549e-31	0.38323	0.655	0.387	6.47454e-27	NK cells	TLN1
1.06844e-30	0.399515	0.412	0.178	1.94595e-26	NK cells	PPP1R18
1.09118e-30	0.4263	0.532	0.276	1.98737e-26	NK cells	DDX6
1.16607e-30	0.431612	0.462	0.211	2.12377e-26	NK cells	TAGAP
1.67348e-30	0.394134	0.367	0.153	3.04791e-26	NK cells	SRPK2
7.11035e-30	0.345128	0.358	0.144	1.29501e-25	NK cells	PTPRE
7.92305e-30	0.328988	0.662	0.374	1.44303e-25	NK cells	CTSC
9.72962e-30	0.361527	0.304	0.107	1.77206e-25	NK cells	TIGIT
1.27325e-29	0.405546	0.342	0.14	2.31897e-25	NK cells	TBCC
2.71835e-29	0.3516	0.264	0.087	4.95093e-25	NK cells	TSEN54
4.30422e-29	0.419497	0.331	0.133	7.83928e-25	NK cells	C16orf54
5.86263e-29	0.308209	0.795	0.479	1.06776e-24	NK cells	STK4
7.23549e-29	0.25048	1	0.985	1.3178e-24	NK cells	MT-ATP6
9.05134e-29	0.458288	0.782	0.476	1.64852e-24	NK cells	CD52
1.41204e-28	0.471503	0.7	0.433	2.57175e-24	NK cells	CREM
1.76809e-28	0.398474	0.313	0.12	3.22021e-24	NK cells	ITGB7
3.07112e-28	0.388375	0.59	0.33	5.59344e-24	NK cells	ICAM3
3.16716e-28	0.406437	0.41	0.192	5.76836e-24	NK cells	STK10
3.54194e-28	0.380881	0.833	0.555	6.45093e-24	NK cells	KLF2
3.65888e-28	0.444543	0.338	0.14	6.66391e-24	NK cells	C1orf56
7.07974e-28	0.398531	0.45	0.211	1.28943e-23	NK cells	ITGA4
1.19198e-27	0.376174	0.36	0.154	2.17096e-23	NK cells	CDKN2D
1.46606e-27	0.32362	0.7	0.424	2.67013e-23	NK cells	RNF213
1.82251e-27	0.374181	0.293	0.11	3.31933e-23	NK cells	CD320
3.90505e-27	0.423651	0.369	0.164	7.11226e-23	NK cells	RNF166
4.84865e-27	0.405782	0.486	0.256	8.83084e-23	NK cells	PCSK7
6.34462e-27	0.345194	0.345	0.141	1.15555e-22	NK cells	SORL1
1.21287e-26	0.335136	0.583	0.333	2.209e-22	NK cells	OSTF1
1.6731e-26	0.374475	0.349	0.153	3.04721e-22	NK cells	RNF168
2.67743e-26	0.376757	0.369	0.165	4.87641e-22	NK cells	RASAL3
5.39406e-26	0.344538	0.581	0.335	9.8242e-22	NK cells	DNAJB6
5.41321e-26	0.35639	0.268	0.096	9.85908e-22	NK cells	MAP3K8
5.8883e-26	0.390955	0.568	0.311	1.07244e-21	NK cells	CLEC2D
7.61129e-26	0.363055	0.813	0.582	1.38624e-21	NK cells	NCL
7.95415e-26	0.382364	0.374	0.166	1.44869e-21	NK cells	PRKCH
8.40175e-26	0.351323	0.345	0.15	1.53021e-21	NK cells	RPA2
9.19943e-26	0.350333	0.462	0.232	1.67549e-21	NK cells	ORAI1
9.44461e-26	0.370622	0.489	0.256	1.72015e-21	NK cells	APBB1IP
1.65879e-25	0.557632	0.437	0.226	3.02116e-21	NK cells	CMC1
3.22535e-25	0.415904	0.565	0.337	5.87433e-21	NK cells	ARPC4
3.36711e-25	0.358224	0.619	0.363	6.13251e-21	NK cells	GPSM3
7.51756e-25	0.404776	0.39	0.187	1.36917e-20	NK cells	SAMD9
7.92936e-25	0.330849	0.68	0.439	1.44417e-20	NK cells	CAP1
8.87427e-25	0.385184	0.428	0.22	1.61627e-20	NK cells	PIP4K2A
1.07112e-24	0.312262	0.471	0.238	1.95083e-20	NK cells	SLC9A3R1
3.79372e-24	0.255057	0.709	0.414	6.90951e-20	NK cells	CD37
4.55985e-24	0.384119	0.428	0.218	8.30485e-20	NK cells	AC245297.3
8.96502e-24	0.356339	0.387	0.188	1.6328e-19	NK cells	MIEN1
1.4052e-23	0.303255	0.705	0.456	2.55929e-19	NK cells	MSN
1.66249e-23	0.336425	0.806	0.587	3.02789e-19	NK cells	IER2
1.86351e-23	0.295697	0.712	0.453	3.394e-19	NK cells	SYNE2
1.87189e-23	0.252826	0.631	0.379	3.40928e-19	NK cells	TERF2IP
2.61073e-23	0.324794	0.484	0.266	4.75492e-19	NK cells	PRMT2
2.8536e-23	0.338481	0.372	0.175	5.19727e-19	NK cells	ZBTB1
3.69371e-23	0.343487	0.705	0.492	6.72736e-19	NK cells	CAST
3.853e-23	0.369052	0.356	0.165	7.01747e-19	NK cells	RNF125
4.67469e-23	0.337024	0.646	0.401	8.514e-19	NK cells	AKAP13
4.754e-23	0.319734	0.883	0.625	8.65846e-19	NK cells	ARHGDIB
5.50656e-23	0.310776	0.372	0.174	1.00291e-18	NK cells	RAP2B
5.81074e-23	0.310717	0.707	0.468	1.05831e-18	NK cells	JAK1
6.51652e-23	0.323801	0.266	0.104	1.18685e-18	NK cells	CCDC69
7.64183e-23	0.364021	0.27	0.108	1.39181e-18	NK cells	MAFF
9.41114e-23	0.364628	0.338	0.155	1.71405e-18	NK cells	RHOF
9.58895e-23	0.350107	0.484	0.269	1.74644e-18	NK cells	ANXA6
1.2796e-22	0.340924	0.462	0.248	2.33053e-18	NK cells	CNOT6L
2.19631e-22	0.277988	0.482	0.258	4.00015e-18	NK cells	SYNE1
2.2974e-22	0.38631	0.394	0.199	4.18426e-18	NK cells	VPS37B
2.79202e-22	0.335532	0.374	0.175	5.08511e-18	NK cells	IKZF3
6.80276e-22	0.336536	0.48	0.274	1.23899e-17	NK cells	SIGIRR
7.82556e-22	0.41372	0.833	0.616	1.42527e-17	NK cells	TXNIP
8.22562e-22	0.340307	0.405	0.21	1.49813e-17	NK cells	IDI1
1.12063e-21	0.34265	0.27	0.111	2.041e-17	NK cells	ARHGAP9
1.2453e-21	0.283149	0.619	0.403	2.26806e-17	NK cells	JTB
2.29973e-21	0.362747	0.356	0.171	4.18851e-17	NK cells	CASP8
2.7927e-21	0.285725	0.372	0.18	5.08634e-17	NK cells	FERMT3
3.08204e-21	0.302039	0.518	0.298	5.61331e-17	NK cells	AAK1
4.25045e-21	0.357563	0.372	0.182	7.74135e-17	NK cells	APOBEC3C
4.60439e-21	0.311779	0.586	0.369	8.38597e-17	NK cells	TRAPPC1
9.34499e-21	0.300088	0.295	0.129	1.702e-16	NK cells	TRAPPC10
1.28932e-20	0.325008	0.705	0.499	2.34825e-16	NK cells	TPM3
1.59885e-20	0.305206	0.329	0.151	2.91198e-16	NK cells	RAB27A
2.28714e-20	0.344059	0.385	0.2	4.16557e-16	NK cells	ANKRD13D
3.47075e-20	0.298197	0.304	0.14	6.32128e-16	NK cells	TADA3
3.70674e-20	0.320524	0.437	0.237	6.75108e-16	NK cells	NSMCE3
4.03457e-20	0.300009	0.457	0.253	7.34817e-16	NK cells	HMGB2
7.018e-20	0.302837	0.514	0.309	1.27819e-15	NK cells	ORMDL1
1.32648e-19	0.323829	0.381	0.198	2.41592e-15	NK cells	TAOK3
1.50278e-19	0.328779	0.482	0.281	2.73701e-15	NK cells	THUMPD3-AS1
2.47011e-19	0.320059	0.268	0.114	4.49881e-15	NK cells	SERPINB9
3.55108e-19	0.284622	0.421	0.226	6.46759e-15	NK cells	ARPC5L
4.0833e-19	0.319358	0.358	0.182	7.43692e-15	NK cells	KIF2A
4.77595e-19	0.268511	0.311	0.144	8.69844e-15	NK cells	HDDC2
5.12449e-19	0.286085	0.475	0.273	9.33323e-15	NK cells	ARHGEF1
5.415e-19	0.327192	0.498	0.302	9.86233e-15	NK cells	ARF6
6.19547e-19	0.288448	0.345	0.17	1.12838e-14	NK cells	CCM2
7.46714e-19	0.284714	0.757	0.527	1.35999e-14	NK cells	YWHAZ
1.05329e-18	0.285148	0.342	0.171	1.91836e-14	NK cells	MFSD10
1.63009e-18	0.330521	0.408	0.229	2.96889e-14	NK cells	CCNDBP1
2.51362e-18	0.285923	0.669	0.462	4.57806e-14	NK cells	KMT2E
2.8029e-18	0.299748	0.529	0.32	5.10493e-14	NK cells	PIK3R1
2.85823e-18	0.285716	0.255	0.109	5.2057e-14	NK cells	ZNF276
2.89126e-18	0.309125	0.421	0.239	5.26586e-14	NK cells	SSBP4
3.25162e-18	0.301658	0.495	0.3	5.92218e-14	NK cells	C9orf78
3.82801e-18	0.275631	0.309	0.148	6.97195e-14	NK cells	NFATC3
4.89247e-18	0.275079	0.313	0.151	8.91066e-14	NK cells	RASSF5
5.07773e-18	0.300825	0.387	0.211	9.24807e-14	NK cells	MED10
5.7101e-18	0.292499	0.423	0.233	1.03998e-13	NK cells	CASP4
6.58708e-18	0.261263	0.599	0.38	1.19971e-13	NK cells	C9orf16
2.22753e-17	0.264454	0.676	0.464	4.05699e-13	NK cells	CALR
2.78204e-17	0.272593	0.498	0.31	5.06693e-13	NK cells	CD164
3.27593e-17	0.262321	0.484	0.297	5.96645e-13	NK cells	KLF13
3.94584e-17	0.311393	0.403	0.225	7.18655e-13	NK cells	IL10RA
4.57862e-17	0.2514	0.651	0.444	8.33904e-13	NK cells	ACTR3
4.964e-17	0.269913	0.354	0.187	9.04093e-13	NK cells	SPSB3
5.40317e-17	0.265989	0.291	0.139	9.84079e-13	NK cells	IL27RA
5.41533e-17	0.276985	0.291	0.142	9.86294e-13	NK cells	FKBP11
7.60224e-17	0.279488	0.782	0.57	1.3846e-12	NK cells	TRIR
7.99165e-17	0.27347	0.252	0.114	1.45552e-12	NK cells	LINC00623
8.16245e-17	0.333898	0.795	0.657	1.48663e-12	NK cells	IL32
8.65899e-17	0.264483	0.759	0.542	1.57706e-12	NK cells	PSME1
8.87152e-17	0.295273	0.275	0.129	1.61577e-12	NK cells	WAS
1.13645e-16	0.251845	0.385	0.206	2.06982e-12	NK cells	SLC38A1
1.42242e-16	0.254343	0.971	0.872	2.59065e-12	NK cells	ACTG1
1.65015e-16	0.289242	0.329	0.171	3.00542e-12	NK cells	APOL6
1.94861e-16	0.285641	0.3	0.148	3.549e-12	NK cells	LNPEP
2.01883e-16	0.289946	0.36	0.2	3.6769e-12	NK cells	MGAT4A
2.02791e-16	0.30163	0.502	0.311	3.69343e-12	NK cells	WIPF1
2.31709e-16	0.288172	0.543	0.354	4.22011e-12	NK cells	PTP4A2
2.42815e-16	0.258842	0.284	0.137	4.42239e-12	NK cells	ZNF394
3.03695e-16	0.2582	0.412	0.237	5.53119e-12	NK cells	DGKZ
3.9278e-16	0.263934	0.268	0.126	7.1537e-12	NK cells	MED30
5.25178e-16	0.257174	0.457	0.272	9.56508e-12	NK cells	UBE2S
6.68425e-16	0.278179	0.338	0.179	1.2174e-11	NK cells	CSK
6.85641e-16	0.250064	0.624	0.427	1.24876e-11	NK cells	DRAP1
1.03866e-15	0.306511	0.387	0.215	1.89172e-11	NK cells	LAT
1.11365e-15	0.279079	0.509	0.329	2.02829e-11	NK cells	YPEL3
1.17763e-15	0.259168	0.464	0.286	2.14482e-11	NK cells	EPC1
1.6654e-15	0.263474	0.304	0.154	3.0332e-11	NK cells	PRKCB
3.12206e-15	0.258635	0.273	0.133	5.6862e-11	NK cells	DEF6
3.13489e-15	0.250016	0.583	0.391	5.70957e-11	NK cells	BZW1
3.36951e-15	0.259384	0.498	0.319	6.13689e-11	NK cells	PRPF38B
4.02001e-15	0.289271	0.255	0.121	7.32164e-11	NK cells	SEMA4D
4.71576e-15	0.270161	0.282	0.139	8.58882e-11	NK cells	RBM38
4.76247e-15	0.26581	0.622	0.43	8.67388e-11	NK cells	SRSF2
6.56904e-15	0.321212	0.579	0.38	1.19642e-10	NK cells	CD3E
8.65805e-15	0.282339	0.3	0.155	1.57689e-10	NK cells	PREX1
1.13893e-14	0.270019	0.403	0.238	2.07434e-10	NK cells	IER5
1.28334e-14	0.257635	0.468	0.287	2.33735e-10	NK cells	ISG20
1.81863e-14	0.273014	0.349	0.2	3.31228e-10	NK cells	DNTTIP2
3.07279e-14	0.275924	0.651	0.477	5.59647e-10	NK cells	SRSF3
3.61118e-14	0.289305	0.309	0.168	6.57704e-10	NK cells	LBR
3.75132e-14	0.264415	0.457	0.285	6.83227e-10	NK cells	TSTD1
3.87971e-14	0.254697	0.286	0.146	7.06611e-10	NK cells	ARAP2
5.46735e-14	0.250136	0.446	0.28	9.95768e-10	NK cells	TAF10
9.07877e-14	0.281654	0.333	0.186	1.65352e-09	NK cells	RAB8B
9.4797e-14	0.312813	0.284	0.141	1.72654e-09	NK cells	FCER1G
2.9887e-13	0.282481	0.408	0.258	5.44333e-09	NK cells	RSBN1L
1.27288e-12	0.251565	0.273	0.146	2.31829e-08	NK cells	ATP2B4
1.36428e-12	0.286688	0.264	0.139	2.48477e-08	NK cells	PSTPIP1
6.25168e-11	0.322575	0.563	0.404	1.13862e-06	NK cells	CD3D
7.53227e-11	0.391214	0.495	0.356	1.37185e-06	NK cells	CD3G
3.29447e-10	0.254956	0.401	0.271	6.00022e-06	NK cells	SERPINB1
0	2.74242	0.92	0.095	0	Endothelial cells 1	VWF
0	2.64347	0.972	0.088	0	Endothelial cells 1	HSPG2
0	2.33262	0.972	0.128	0	Endothelial cells 1	FLT1
0	2.32338	0.975	0.106	0	Endothelial cells 1	EGFL7
0	2.14747	0.957	0.129	0	Endothelial cells 1	PLPP3
0	2.14448	0.923	0.106	0	Endothelial cells 1	INSR
0	2.05779	0.926	0.064	0	Endothelial cells 1	KDR
0	2.04288	0.873	0.027	0	Endothelial cells 1	BTNL9
0	1.88909	0.941	0.114	0	Endothelial cells 1	ENG
0	1.87823	0.877	0.045	0	Endothelial cells 1	PTPRB
0	1.87704	0.855	0.031	0	Endothelial cells 1	NOTCH4
0	1.8404	0.941	0.109	0	Endothelial cells 1	TCF4
0	1.82939	0.898	0.072	0	Endothelial cells 1	PODXL
0	1.82185	0.833	0.063	0	Endothelial cells 1	EFNB2
0	1.80681	0.907	0.095	0	Endothelial cells 1	SOX18
0	1.76616	0.87	0.066	0	Endothelial cells 1	VWA1
0	1.76453	0.895	0.078	0	Endothelial cells 1	ARHGAP29
0	1.74287	0.818	0.062	0	Endothelial cells 1	GJA1
0	1.69461	0.852	0.072	0	Endothelial cells 1	UACA
0	1.56161	0.79	0.056	0	Endothelial cells 1	CD93
0	1.54518	0.821	0.061	0	Endothelial cells 1	ADGRF5
0	1.54448	0.793	0.05	0	Endothelial cells 1	ADGRL4
0	1.54047	0.83	0.037	0	Endothelial cells 1	EXOC3L2
0	1.5086	0.756	0.047	0	Endothelial cells 1	MEIS2
0	1.46209	0.781	0.027	0	Endothelial cells 1	SHANK3
0	1.4497	0.744	0.035	0	Endothelial cells 1	GRB10
0	1.44939	0.79	0.044	0	Endothelial cells 1	SLCO2A1
0	1.44401	0.806	0.055	0	Endothelial cells 1	LDB2
0	1.39663	0.775	0.033	0	Endothelial cells 1	MMRN2
0	1.39248	0.698	0.028	0	Endothelial cells 1	CDH5
0	1.35787	0.71	0.037	0	Endothelial cells 1	CD34
0	1.32895	0.716	0.037	0	Endothelial cells 1	LIMCH1
0	1.32711	0.698	0.024	0	Endothelial cells 1	ROBO4
0	1.2557	0.599	0.015	0	Endothelial cells 1	PLXNA2
0	1.25185	0.673	0.028	0	Endothelial cells 1	DOCK6
0	1.17272	0.639	0.025	0	Endothelial cells 1	RASIP1
0	1.16176	0.54	0.012	0	Endothelial cells 1	FLT4
9.14584e-307	1.25464	0.605	0.023	1.66573e-302	Endothelial cells 1	DLL4
1.38318e-303	2.11568	0.963	0.133	2.51919e-299	Endothelial cells 1	PLVAP
7.41528e-302	1.49388	0.784	0.066	1.35055e-297	Endothelial cells 1	PLXND1
1.33697e-298	1.08912	0.559	0.018	2.43503e-294	Endothelial cells 1	SCARF1
6.87647e-297	1.50676	0.725	0.05	1.25241e-292	Endothelial cells 1	LRRC32
1.16724e-294	1.30185	0.645	0.034	2.1259e-290	Endothelial cells 1	PIK3R3
2.40954e-294	1.4129	0.793	0.064	4.3885e-290	Endothelial cells 1	CLEC14A
3.99887e-294	1.77901	0.892	0.102	7.28314e-290	Endothelial cells 1	COL4A1
4.40101e-292	1.50729	0.824	0.076	8.01557e-288	Endothelial cells 1	TM4SF18
5.67334e-292	1.18581	0.627	0.032	1.03329e-287	Endothelial cells 1	TNS2
1.37142e-290	1.54265	0.883	0.092	2.49778e-286	Endothelial cells 1	RAMP3
5.07422e-288	1.12325	0.596	0.026	9.24168e-284	Endothelial cells 1	JCAD
1.12589e-287	1.18423	0.546	0.019	2.05058e-283	Endothelial cells 1	UNC5B
2.13816e-284	1.85876	0.96	0.147	3.89423e-280	Endothelial cells 1	PECAM1
3.84786e-283	1.0668	0.54	0.018	7.0081e-279	Endothelial cells 1	PCDH12
8.05232e-283	1.69551	0.84	0.089	1.46657e-278	Endothelial cells 1	EMCN
2.28418e-282	1.52142	0.79	0.072	4.16017e-278	Endothelial cells 1	COL4A2
3.28678e-282	2.18474	0.944	0.139	5.98622e-278	Endothelial cells 1	ESM1
2.6956e-280	1.42147	0.818	0.08	4.9095e-276	Endothelial cells 1	NRP1
7.36698e-279	1.91611	0.688	0.051	1.34175e-274	Endothelial cells 1	KCNE3
5.50694e-278	1.1491	0.617	0.034	1.00298e-273	Endothelial cells 1	KANK3
6.11626e-278	1.43221	0.559	0.022	1.11395e-273	Endothelial cells 1	INHBB
1.29622e-276	1.06292	0.639	0.036	2.36081e-272	Endothelial cells 1	CYYR1
1.49044e-275	1.10363	0.559	0.023	2.71454e-271	Endothelial cells 1	SIPA1L2
1.36346e-274	1.13293	0.559	0.024	2.48328e-270	Endothelial cells 1	SEMA3F
2.81134e-274	1.02235	0.441	0.007	5.1203e-270	Endothelial cells 1	GABRE
8.33541e-269	1.03517	0.525	0.019	1.51813e-264	Endothelial cells 1	CDH13
7.16688e-268	1.15291	0.627	0.038	1.3053e-263	Endothelial cells 1	CALCRL
1.44404e-267	1.23932	0.741	0.064	2.63003e-263	Endothelial cells 1	NOSTRIN
2.83544e-266	1.30826	0.79	0.079	5.16418e-262	Endothelial cells 1	NPDC1
9.76441e-266	1.13955	0.608	0.035	1.77839e-261	Endothelial cells 1	ACVRL1
2.51751e-265	1.0117	0.478	0.013	4.58515e-261	Endothelial cells 1	RAPGEF4
2.98836e-264	1.31596	0.744	0.068	5.44271e-260	Endothelial cells 1	WWTR1
6.07254e-263	1.6999	0.904	0.128	1.10599e-258	Endothelial cells 1	PLPP1
1.39629e-262	0.937227	0.494	0.016	2.54306e-258	Endothelial cells 1	TIE1
2.29808e-262	1.1459	0.599	0.034	4.18549e-258	Endothelial cells 1	JUP
5.41903e-262	1.36208	0.645	0.044	9.86968e-258	Endothelial cells 1	EMP1
3.11926e-261	1.05688	0.515	0.019	5.68111e-257	Endothelial cells 1	CASKIN2
1.18825e-260	0.933768	0.438	0.009	2.16416e-256	Endothelial cells 1	DCHS1
2.23477e-260	1.82861	0.809	0.094	4.07019e-256	Endothelial cells 1	SPRY1
5.39768e-259	1.33786	0.599	0.035	9.8308e-255	Endothelial cells 1	PCDH17
1.35906e-258	1.20481	0.688	0.054	2.47525e-254	Endothelial cells 1	ESAM
4.2567e-257	1.48752	0.824	0.09	7.75273e-253	Endothelial cells 1	RAMP2
8.21161e-257	1.37417	0.617	0.04	1.49558e-252	Endothelial cells 1	CX3CL1
1.41161e-256	1.69156	0.907	0.132	2.57096e-252	Endothelial cells 1	SLC9A3R2
4.73027e-254	1.12429	0.574	0.031	8.61524e-250	Endothelial cells 1	TMEM150C
9.87217e-254	1.7161	0.787	0.094	1.79802e-249	Endothelial cells 1	APOLD1
1.55182e-253	1.8225	0.972	0.192	2.82633e-249	Endothelial cells 1	APP
3.1404e-253	0.931873	0.5	0.018	5.7196e-249	Endothelial cells 1	SHE
4.54807e-253	0.936863	0.444	0.011	8.2834e-249	Endothelial cells 1	MID1
7.96793e-253	1.07634	0.515	0.022	1.4512e-248	Endothelial cells 1	COL15A1
3.43497e-252	1.85668	0.957	0.177	6.25611e-248	Endothelial cells 1	EPAS1
2.12947e-251	1.42128	0.738	0.07	3.87841e-247	Endothelial cells 1	CAVIN2
2.63121e-251	1.2971	0.75	0.073	4.79223e-247	Endothelial cells 1	HYAL2
1.69793e-248	1.09622	0.633	0.045	3.09244e-244	Endothelial cells 1	LAMB2
2.45472e-248	1.71377	0.812	0.099	4.47077e-244	Endothelial cells 1	RBP7
1.46076e-247	1.04697	0.522	0.023	2.66048e-243	Endothelial cells 1	APLNR
2.50544e-247	0.990959	0.522	0.023	4.56315e-243	Endothelial cells 1	LAMA4
5.65381e-246	1.29774	0.679	0.057	1.02973e-241	Endothelial cells 1	EDNRB
2.79212e-244	1.02483	0.583	0.034	5.08528e-240	Endothelial cells 1	ECSCR
6.3603e-243	1.56187	0.92	0.165	1.1584e-238	Endothelial cells 1	SEC14L1
7.11651e-242	0.952606	0.559	0.031	1.29613e-237	Endothelial cells 1	PALMD
7.31536e-242	1.97627	0.963	0.209	1.33235e-237	Endothelial cells 1	A2M
1.84791e-241	1.17	0.614	0.044	3.3656e-237	Endothelial cells 1	FAM198B
5.44841e-240	0.952673	0.491	0.02	9.92319e-236	Endothelial cells 1	ERG
4.55993e-239	1.1668	0.698	0.063	8.305e-235	Endothelial cells 1	TMEM88
7.68389e-238	1.21982	0.682	0.06	1.39947e-233	Endothelial cells 1	TM4SF1
8.37196e-238	1.03309	0.552	0.031	1.52478e-233	Endothelial cells 1	RAPGEF5
1.13898e-237	1.19783	0.642	0.053	2.07442e-233	Endothelial cells 1	PDGFD
2.33521e-237	1.16541	0.5	0.023	4.25311e-233	Endothelial cells 1	LIFR
6.49002e-237	1.82281	0.954	0.196	1.18203e-232	Endothelial cells 1	GSN
2.55164e-234	1.36523	0.79	0.095	4.64731e-230	Endothelial cells 1	LMO2
3.68225e-234	1.19693	0.75	0.083	6.70648e-230	Endothelial cells 1	PPFIBP1
7.70323e-233	1.11863	0.648	0.055	1.40299e-228	Endothelial cells 1	BCAM
3.15278e-232	0.997511	0.512	0.026	5.74217e-228	Endothelial cells 1	FZD4
1.03227e-231	0.879479	0.531	0.029	1.88007e-227	Endothelial cells 1	IL3RA
1.00798e-230	1.02897	0.531	0.03	1.83583e-226	Endothelial cells 1	FGD5
8.64666e-229	1.03824	0.534	0.032	1.57482e-224	Endothelial cells 1	RASGRP3
2.60207e-228	1.17186	0.491	0.024	4.73915e-224	Endothelial cells 1	CEACAM1
5.42419e-228	1.52652	0.87	0.131	9.87908e-224	Endothelial cells 1	RNASE1
1.26051e-226	0.837759	0.46	0.018	2.29576e-222	Endothelial cells 1	MYCT1
2.52088e-226	1.26539	0.799	0.105	4.59128e-222	Endothelial cells 1	MEF2C
8.50481e-226	1.13545	0.574	0.042	1.54898e-221	Endothelial cells 1	PBX1
7.34653e-225	1.02736	0.534	0.032	1.33802e-220	Endothelial cells 1	PTPRG
1.68785e-224	0.84425	0.41	0.011	3.07408e-220	Endothelial cells 1	BOC
2.64018e-224	0.946134	0.5	0.026	4.80856e-220	Endothelial cells 1	DOCK4
5.23259e-224	1.1683	0.676	0.066	9.53012e-220	Endothelial cells 1	DLC1
1.04367e-223	1.61033	0.929	0.199	1.90083e-219	Endothelial cells 1	SPTBN1
8.66836e-222	0.989939	0.472	0.022	1.57877e-217	Endothelial cells 1	NID1
3.0001e-221	0.844244	0.414	0.013	5.46408e-217	Endothelial cells 1	NOVA2
1.16956e-220	1.22794	0.725	0.082	2.13013e-216	Endothelial cells 1	GAS6
1.75347e-220	1.89488	0.889	0.165	3.19359e-216	Endothelial cells 1	SPARCL1
6.22982e-220	1.99087	0.948	0.216	1.13464e-215	Endothelial cells 1	TIMP3
8.33409e-220	1.85113	0.975	0.247	1.51789e-215	Endothelial cells 1	SPARC
1.83146e-218	0.870871	0.466	0.022	3.33563e-214	Endothelial cells 1	TMEM255B
3.3786e-218	1.22109	0.627	0.059	6.15344e-214	Endothelial cells 1	NOTCH1
5.69306e-218	1.25296	0.691	0.078	1.03688e-213	Endothelial cells 1	BMPR2
4.12263e-217	1.47949	0.92	0.177	7.50855e-213	Endothelial cells 1	GNG11
4.12801e-217	1.39402	0.719	0.086	7.51835e-213	Endothelial cells 1	HEG1
4.45816e-217	1.012	0.537	0.035	8.11964e-213	Endothelial cells 1	TSPAN7
2.57128e-216	1.04676	0.556	0.04	4.68308e-212	Endothelial cells 1	SMTN
6.63105e-216	0.929838	0.506	0.03	1.20771e-211	Endothelial cells 1	LIMS2
7.96806e-216	1.18781	0.731	0.09	1.45122e-211	Endothelial cells 1	TMEM204
1.01927e-215	1.15418	0.657	0.065	1.85639e-211	Endothelial cells 1	ITGA1
1.08512e-214	0.832234	0.417	0.014	1.97632e-210	Endothelial cells 1	PDE2A
4.85568e-214	1.25912	0.525	0.034	8.84365e-210	Endothelial cells 1	CA4
1.88416e-212	1.26095	0.802	0.122	3.43163e-208	Endothelial cells 1	IL6ST
7.61975e-210	1.13532	0.509	0.033	1.38778e-205	Endothelial cells 1	NETO2
3.42687e-208	1.22425	0.657	0.067	6.24137e-204	Endothelial cells 1	FAM167B
1.97633e-207	1.12591	0.506	0.031	3.59949e-203	Endothelial cells 1	CETP
2.3541e-207	1.51879	0.923	0.18	4.28752e-203	Endothelial cells 1	IFI27
3.8741e-207	0.816884	0.404	0.014	7.05589e-203	Endothelial cells 1	PREX2
4.87738e-206	0.865951	0.481	0.028	8.88317e-202	Endothelial cells 1	SORBS2
1.84325e-205	0.81605	0.386	0.012	3.35712e-201	Endothelial cells 1	BCL6B
3.1002e-204	0.772444	0.392	0.013	5.6464e-200	Endothelial cells 1	ARHGEF15
5.56478e-204	0.914347	0.519	0.035	1.01351e-199	Endothelial cells 1	FSCN1
2.43919e-203	1.67585	0.685	0.081	4.44249e-199	Endothelial cells 1	FCN3
3.01056e-203	0.825218	0.392	0.013	5.48314e-199	Endothelial cells 1	AFAP1L1
4.20498e-203	1.07117	0.574	0.05	7.65852e-199	Endothelial cells 1	PPM1F
7.64421e-202	0.794049	0.404	0.015	1.39224e-197	Endothelial cells 1	TEK
2.29441e-201	0.874939	0.448	0.023	4.17882e-197	Endothelial cells 1	SPRY4
2.73592e-201	0.954848	0.605	0.055	4.98293e-197	Endothelial cells 1	EMP2
1.46449e-199	1.59556	0.836	0.143	2.66728e-195	Endothelial cells 1	ID1
5.28926e-199	1.43536	0.889	0.18	9.63333e-195	Endothelial cells 1	IGFBP4
1.73892e-198	1.20471	0.574	0.053	3.16709e-194	Endothelial cells 1	TP53I11
2.24308e-198	1.12946	0.639	0.071	4.08532e-194	Endothelial cells 1	MYO6
7.09264e-196	1.01773	0.63	0.066	1.29178e-191	Endothelial cells 1	HTRA1
1.73227e-195	0.666441	0.34	0.008	3.15498e-191	Endothelial cells 1	HECW2
4.27022e-195	0.793123	0.386	0.014	7.77735e-191	Endothelial cells 1	NPR1
9.17843e-193	0.816786	0.438	0.024	1.67167e-188	Endothelial cells 1	NDST1
1.34592e-191	0.88667	0.488	0.034	2.45132e-187	Endothelial cells 1	RASAL2
6.24796e-191	1.20835	0.741	0.111	1.13794e-186	Endothelial cells 1	EVA1B
1.54593e-190	0.840319	0.395	0.017	2.81561e-186	Endothelial cells 1	GPR4
7.11849e-190	1.07737	0.485	0.033	1.29649e-185	Endothelial cells 1	CLDN5
2.55342e-188	1.24385	0.765	0.131	4.65054e-184	Endothelial cells 1	RFLNB
1.28686e-187	2.36337	0.917	0.268	2.34376e-183	Endothelial cells 1	IGFBP5
1.9248e-187	1.06908	0.611	0.069	3.50564e-183	Endothelial cells 1	ITGA5
2.87367e-187	0.846233	0.377	0.014	5.23382e-183	Endothelial cells 1	KCNN3
6.27093e-185	0.666611	0.346	0.01	1.14212e-180	Endothelial cells 1	SEMA6B
1.16783e-184	1.01081	0.549	0.052	2.12697e-180	Endothelial cells 1	DGKH
4.93241e-184	0.881186	0.519	0.042	8.9834e-180	Endothelial cells 1	EFNA1
7.89744e-184	0.847267	0.435	0.025	1.43836e-179	Endothelial cells 1	SYNPO
5.63373e-182	0.781508	0.343	0.01	1.02607e-177	Endothelial cells 1	PIEZO2
2.2942e-180	1.5639	0.861	0.206	4.17844e-176	Endothelial cells 1	TGFBR2
6.0105e-180	0.919244	0.46	0.032	1.09469e-175	Endothelial cells 1	PDGFB
1.7896e-179	1.14693	0.725	0.117	3.2594e-175	Endothelial cells 1	EHD4
2.10134e-179	0.818226	0.451	0.03	3.82717e-175	Endothelial cells 1	TSPAN13
5.49831e-179	0.745153	0.336	0.01	1.00141e-174	Endothelial cells 1	ADCY4
9.00714e-179	0.832951	0.438	0.028	1.64047e-174	Endothelial cells 1	DYSF
6.09767e-178	0.880215	0.435	0.028	1.11057e-173	Endothelial cells 1	PDIA5
9.05574e-178	0.874534	0.444	0.03	1.64932e-173	Endothelial cells 1	ZNF503
1.23476e-177	0.737834	0.355	0.013	2.24887e-173	Endothelial cells 1	SHC2
4.82799e-177	0.709665	0.309	0.007	8.79323e-173	Endothelial cells 1	ARHGEF10
1.4934e-176	0.770444	0.367	0.016	2.71993e-172	Endothelial cells 1	AGRN
4.31423e-176	0.707665	0.333	0.01	7.85752e-172	Endothelial cells 1	SLC22A23
1.46714e-175	0.987828	0.602	0.073	2.6721e-171	Endothelial cells 1	ECE1
1.71524e-175	1.42842	0.679	0.098	3.12396e-171	Endothelial cells 1	HES1
7.26128e-175	0.690361	0.333	0.011	1.3225e-170	Endothelial cells 1	EXOC3L1
2.20883e-173	0.678456	0.377	0.018	4.02294e-169	Endothelial cells 1	EML1
2.58544e-173	1.09032	0.664	0.095	4.70886e-169	Endothelial cells 1	ITGA6
6.01026e-173	0.895635	0.451	0.033	1.09465e-168	Endothelial cells 1	TNFAIP1
1.92384e-172	0.652902	0.364	0.016	3.50389e-168	Endothelial cells 1	GALNT18
2.66191e-172	0.866636	0.478	0.039	4.84814e-168	Endothelial cells 1	FGFR1
9.93291e-172	0.683464	0.336	0.012	1.80908e-167	Endothelial cells 1	PXDN
6.03637e-171	1.08665	0.731	0.123	1.0994e-166	Endothelial cells 1	LIMA1
2.65193e-170	0.634412	0.315	0.009	4.82996e-166	Endothelial cells 1	RAPGEF3
4.09771e-170	0.82446	0.451	0.033	7.46316e-166	Endothelial cells 1	ITGB5
2.01215e-169	0.970427	0.636	0.081	3.66472e-165	Endothelial cells 1	THY1
2.9842e-167	0.806251	0.395	0.023	5.43513e-163	Endothelial cells 1	RPS6KA2
3.62881e-167	0.784404	0.46	0.037	6.60916e-163	Endothelial cells 1	NECTIN2
1.11442e-166	1.16099	0.802	0.158	2.02969e-162	Endothelial cells 1	CRIP2
3.38516e-166	0.96468	0.503	0.047	6.1654e-162	Endothelial cells 1	TMEM47
3.676e-166	0.65849	0.315	0.01	6.69509e-162	Endothelial cells 1	SHROOM4
4.99737e-166	0.814372	0.466	0.038	9.10172e-162	Endothelial cells 1	TJP1
5.11493e-166	0.706561	0.315	0.01	9.31582e-162	Endothelial cells 1	LRP6
7.54947e-166	0.949798	0.472	0.039	1.37498e-161	Endothelial cells 1	THBD
7.83698e-166	0.611185	0.306	0.009	1.42735e-161	Endothelial cells 1	USHBP1
1.1758e-165	0.715066	0.373	0.019	2.14149e-161	Endothelial cells 1	CXorf36
1.9692e-165	1.46969	0.861	0.235	3.58651e-161	Endothelial cells 1	SH3BP5
3.29514e-165	0.809986	0.475	0.04	6.00144e-161	Endothelial cells 1	GIMAP8
6.09805e-165	0.978525	0.623	0.084	1.11064e-160	Endothelial cells 1	ARHGEF12
1.56532e-164	1.05648	0.694	0.11	2.85092e-160	Endothelial cells 1	RAB13
5.84317e-164	1.05941	0.682	0.106	1.06422e-159	Endothelial cells 1	GRASP
3.79457e-163	0.804422	0.42	0.029	6.91106e-159	Endothelial cells 1	MPZL2
3.02134e-162	0.687304	0.358	0.017	5.50277e-158	Endothelial cells 1	COL8A1
1.09718e-161	0.762336	0.37	0.019	1.99829e-157	Endothelial cells 1	TMEM233
2.12213e-161	0.889691	0.466	0.041	3.86504e-157	Endothelial cells 1	DOCK9
1.30358e-160	0.825125	0.333	0.014	2.37421e-156	Endothelial cells 1	KCNJ2
8.45127e-160	0.68735	0.417	0.029	1.53923e-155	Endothelial cells 1	PCAT19
3.37557e-158	0.643199	0.318	0.012	6.14793e-154	Endothelial cells 1	ARAP3
7.33974e-158	0.99262	0.657	0.099	1.33679e-153	Endothelial cells 1	NFIB
6.58221e-157	0.797706	0.432	0.034	1.19882e-152	Endothelial cells 1	TAOK2
1.01755e-156	0.831195	0.414	0.03	1.85326e-152	Endothelial cells 1	TMTC1
2.80124e-156	1.26707	0.827	0.186	5.1019e-152	Endothelial cells 1	ID3
1.36877e-155	0.940731	0.593	0.08	2.49294e-151	Endothelial cells 1	MYO1C
1.07157e-154	0.761218	0.392	0.026	1.95166e-150	Endothelial cells 1	MRC1
2.49098e-154	0.660472	0.293	0.009	4.53683e-150	Endothelial cells 1	SMAD6
3.67088e-154	0.866248	0.454	0.041	6.68578e-150	Endothelial cells 1	TMCC3
4.21475e-154	0.99978	0.583	0.078	7.67632e-150	Endothelial cells 1	WARS
6.84498e-154	0.824095	0.485	0.048	1.24668e-149	Endothelial cells 1	NCKAP1
8.29726e-154	0.750399	0.38	0.024	1.51118e-149	Endothelial cells 1	HLX
4.476e-153	0.931815	0.71	0.119	8.15214e-149	Endothelial cells 1	CAVIN1
1.06247e-152	0.732802	0.361	0.021	1.93508e-148	Endothelial cells 1	PHLDB1
1.69959e-151	0.778339	0.392	0.027	3.09546e-147	Endothelial cells 1	STAB1
2.53498e-151	0.755444	0.404	0.03	4.61695e-147	Endothelial cells 1	RBMS2
3.11016e-150	1.62367	0.556	0.073	5.66453e-146	Endothelial cells 1	FN1
1.75095e-149	0.688445	0.327	0.015	3.18901e-145	Endothelial cells 1	ITIH5
2.06231e-149	0.704727	0.336	0.017	3.75609e-145	Endothelial cells 1	LAMB1
3.82885e-149	0.712927	0.358	0.021	6.97348e-145	Endothelial cells 1	LAMA5
7.67704e-149	0.975445	0.719	0.128	1.39822e-144	Endothelial cells 1	CNN3
4.11852e-148	0.827181	0.506	0.057	7.50106e-144	Endothelial cells 1	CTNND1
1.70983e-147	0.681527	0.299	0.012	3.11411e-143	Endothelial cells 1	JAG2
1.90545e-147	0.692458	0.343	0.019	3.4704e-143	Endothelial cells 1	BTBD3
3.05088e-147	0.624665	0.312	0.014	5.55656e-143	Endothelial cells 1	SNED1
3.69799e-146	0.674502	0.333	0.018	6.73515e-142	Endothelial cells 1	NAV1
4.58963e-146	0.689214	0.287	0.01	8.35909e-142	Endothelial cells 1	DLL1
7.1074e-146	0.657329	0.34	0.019	1.29447e-141	Endothelial cells 1	CD200
1.93677e-145	0.646042	0.287	0.01	3.52743e-141	Endothelial cells 1	SOX17
2.52497e-145	0.79363	0.454	0.043	4.59872e-141	Endothelial cells 1	FSTL1
6.04677e-145	1.38454	0.994	0.455	1.1013e-140	Endothelial cells 1	IGFBP7
8.00299e-145	1.29269	0.938	0.327	1.45758e-140	Endothelial cells 1	IFITM3
1.02591e-143	0.665652	0.392	0.029	1.86849e-139	Endothelial cells 1	HOXD8
5.48847e-143	1.0658	0.568	0.084	9.99616e-139	Endothelial cells 1	HDAC7
5.94607e-143	0.689489	0.358	0.023	1.08296e-138	Endothelial cells 1	MAP3K6
5.56832e-142	0.842298	0.395	0.032	1.01416e-137	Endothelial cells 1	SLC23A2
6.39769e-142	0.778864	0.478	0.053	1.16521e-137	Endothelial cells 1	ITPRIPL2
2.6124e-141	0.815548	0.497	0.059	4.75796e-137	Endothelial cells 1	AFDN
2.61646e-141	0.859273	0.611	0.097	4.76537e-137	Endothelial cells 1	ELK3
1.50982e-140	0.601996	0.312	0.015	2.74984e-136	Endothelial cells 1	EMID1
2.26202e-140	0.558119	0.269	0.009	4.11982e-136	Endothelial cells 1	CCM2L
5.41467e-139	0.780953	0.358	0.025	9.86174e-135	Endothelial cells 1	RASA4
5.40222e-138	0.917408	0.58	0.09	9.83906e-134	Endothelial cells 1	SLC44A2
6.21103e-138	0.668342	0.309	0.015	1.13121e-133	Endothelial cells 1	COL21A1
3.11491e-137	0.658553	0.343	0.022	5.67318e-133	Endothelial cells 1	RBMS3
6.88341e-137	0.57315	0.275	0.01	1.25367e-132	Endothelial cells 1	TRIL
5.01927e-136	0.849351	0.67	0.12	9.1416e-132	Endothelial cells 1	TIMP2
5.33121e-136	0.55064	0.272	0.01	9.70974e-132	Endothelial cells 1	NID2
6.49119e-136	0.591649	0.299	0.014	1.18224e-131	Endothelial cells 1	MAGI1
2.20493e-134	0.874688	0.41	0.038	4.01583e-130	Endothelial cells 1	NRP2
3.98761e-134	1.51258	0.957	0.554	7.26263e-130	Endothelial cells 1	NEAT1
6.35608e-134	1.1664	0.367	0.029	1.15763e-129	Endothelial cells 1	STC1
1.73979e-133	0.768364	0.485	0.058	3.16869e-129	Endothelial cells 1	YES1
1.56907e-132	0.640568	0.306	0.017	2.85775e-128	Endothelial cells 1	PLEKHG1
1.90883e-132	0.887576	0.515	0.071	3.47655e-128	Endothelial cells 1	ITPRIP
2.01725e-132	0.702424	0.46	0.05	3.67401e-128	Endothelial cells 1	FXYD6
5.38672e-132	0.903255	0.571	0.088	9.81084e-128	Endothelial cells 1	DUSP6
7.42687e-132	0.660908	0.296	0.015	1.35266e-127	Endothelial cells 1	EPHB4
1.58275e-131	0.732725	0.392	0.035	2.88266e-127	Endothelial cells 1	GFOD2
1.85623e-131	0.800194	0.404	0.039	3.38075e-127	Endothelial cells 1	SEMA4C
3.69137e-131	0.668779	0.392	0.035	6.7231e-127	Endothelial cells 1	CTTNBP2NL
7.51924e-131	0.769082	0.481	0.059	1.36948e-126	Endothelial cells 1	SERPINH1
9.52796e-131	0.822984	0.593	0.094	1.73533e-126	Endothelial cells 1	S100A16
1.79815e-130	0.731358	0.423	0.043	3.27497e-126	Endothelial cells 1	CDC42BPA
8.78524e-130	0.835284	0.491	0.066	1.60005e-125	Endothelial cells 1	KIAA0355
2.39739e-129	0.523564	0.265	0.01	4.36637e-125	Endothelial cells 1	ARHGAP23
2.79884e-129	0.734319	0.509	0.064	5.09752e-125	Endothelial cells 1	TINAGL1
3.48366e-129	0.590873	0.321	0.02	6.34479e-125	Endothelial cells 1	OLFML2A
1.06198e-128	0.823358	0.58	0.097	1.93418e-124	Endothelial cells 1	GNAQ
1.45589e-128	0.595201	0.265	0.011	2.65161e-124	Endothelial cells 1	KALRN
1.60218e-127	1.22731	0.815	0.257	2.91805e-123	Endothelial cells 1	SERPINB6
2.40778e-127	0.5543	0.265	0.011	4.38529e-123	Endothelial cells 1	GPIHBP1
1.44682e-126	0.926917	0.824	0.217	2.63509e-122	Endothelial cells 1	MGP
2.01298e-126	0.606949	0.262	0.011	3.66624e-122	Endothelial cells 1	MATN2
5.08054e-126	0.991892	0.725	0.165	9.25318e-122	Endothelial cells 1	MARCKSL1
1.21649e-125	0.640487	0.429	0.047	2.21559e-121	Endothelial cells 1	GNA11
1.98925e-125	0.584137	0.293	0.016	3.62303e-121	Endothelial cells 1	AMOTL1
2.68516e-125	0.773057	0.546	0.085	4.89048e-121	Endothelial cells 1	PINK1
7.03126e-125	0.752507	0.414	0.043	1.2806e-120	Endothelial cells 1	PKP4
1.17807e-123	0.710646	0.364	0.032	2.14562e-119	Endothelial cells 1	CMTM8
6.46106e-123	0.539561	0.296	0.017	1.17675e-118	Endothelial cells 1	CDC42EP5
2.4761e-122	1.596	0.846	0.33	4.50972e-118	Endothelial cells 1	IVNS1ABP
3.77999e-122	0.708731	0.398	0.04	6.88449e-118	Endothelial cells 1	SASH1
1.91878e-121	0.633521	0.361	0.031	3.49468e-117	Endothelial cells 1	RBP1
5.14326e-121	0.658655	0.33	0.025	9.36741e-117	Endothelial cells 1	APBB2
2.41167e-120	1.01183	0.759	0.206	4.39238e-116	Endothelial cells 1	CTNNB1
2.46197e-120	0.503839	0.281	0.015	4.48399e-116	Endothelial cells 1	TANC1
2.5609e-120	0.716864	0.327	0.025	4.66416e-116	Endothelial cells 1	MCF2L
3.24719e-120	0.691344	0.377	0.036	5.91411e-116	Endothelial cells 1	PTPRM
6.44171e-120	0.996144	0.5	0.073	1.17323e-115	Endothelial cells 1	HES4
6.56148e-120	0.577688	0.299	0.019	1.19504e-115	Endothelial cells 1	JAM3
3.83296e-119	0.889601	0.519	0.082	6.98097e-115	Endothelial cells 1	OSBPL1A
4.63915e-119	0.645291	0.269	0.013	8.44928e-115	Endothelial cells 1	FCN2
9.70924e-119	0.865909	0.71	0.167	1.76834e-114	Endothelial cells 1	RDX
1.48708e-118	0.532423	0.265	0.013	2.70842e-114	Endothelial cells 1	FAM110D
1.68905e-118	0.542385	0.272	0.014	3.07627e-114	Endothelial cells 1	GPRC5B
1.80191e-118	0.752601	0.441	0.056	3.28182e-114	Endothelial cells 1	FCHO2
1.74145e-117	0.721902	0.515	0.078	3.17171e-113	Endothelial cells 1	EPHX1
2.04501e-117	0.950948	0.694	0.168	3.72457e-113	Endothelial cells 1	NCOA7
2.60747e-117	0.822819	0.54	0.09	4.74899e-113	Endothelial cells 1	ZEB1
4.17943e-117	1.02428	0.633	0.129	7.612e-113	Endothelial cells 1	PRSS23
6.17549e-117	0.592066	0.296	0.019	1.12474e-112	Endothelial cells 1	JAM2
3.41641e-116	0.824562	0.556	0.097	6.2223e-112	Endothelial cells 1	SWAP70
2.25351e-115	0.989797	0.633	0.135	4.10432e-111	Endothelial cells 1	GBP4
7.04314e-115	0.656806	0.327	0.026	1.28277e-110	Endothelial cells 1	RAI14
8.41885e-115	0.593416	0.272	0.015	1.53333e-110	Endothelial cells 1	FAM107A
1.92205e-114	0.61043	0.358	0.034	3.50063e-110	Endothelial cells 1	PDE8A
2.85914e-114	0.783074	0.488	0.075	5.20734e-110	Endothelial cells 1	PEA15
5.46771e-114	1.11142	0.608	0.129	9.95834e-110	Endothelial cells 1	XAF1
7.95617e-114	0.630705	0.315	0.025	1.44906e-109	Endothelial cells 1	RHOU
1.09592e-113	0.810525	0.512	0.081	1.99601e-109	Endothelial cells 1	COL18A1
[truncated: 4,320 more rows]
